# Supplementary material for: Genomic structure in Europeans dating back at least 36,200 years
Source: HighWire-hosted journal article supplement (doi:10.1126/science.aaa0114), 2014-11-07
Supplement: Seguin-Orlando.SM.pdf [file Seguin-Orlando.SM.pdf]

## Supplementary Materials for

### **Genomic structure in Europeans dating back at least 36,200 years**

Andaine Seguin-Orlando, Thorfinn S. Korneliussen, Martin Sikora,  
Anna-Sapfo Malaspinas, Andrea Manica, Ida Moltke, Anders Albrechtsen, Amy Ko,  
Ashot Margaryan, Vyacheslav Moiseyev, Ted Goebel, Michael Westaway,  
David Lambert, Valeri Khartanovich, Jeffrey D. Wall, Philip R. Nigst, Robert A. Foley,  
Marta Mirazon Lahr,\* Rasmus Nielsen,\* Ludovic Orlando, Eske Willerslev\*

\*Corresponding author. E-mail: ewillerslev@snm.ku.dk (E.W.);  
rasmus\_nielsen@berkeley.edu (R.N.); mbml1@cam.ac.uk (M.M.L.)

Published 6 November 2014 on *Science Express*  
DOI: 10.1126/science.aaa0114

#### **This PDF file includes:**

Materials and Methods  
Supplementary Text  
Figs. S1 to S26  
Tables S1 to S18  
References

## **S1: Archaeological context and description of Kostenki 14**

### **The Kostenki-Borshchevo localities**

The village of Kostenki and its neighbouring archaeological sites (Kostenki and Borshchevo) are located on the west bank of the Middle Don River, Russia (51°24' N, 39°02' E), c. 40 km south of the city of Voronezh (Fig. 1A). The first archaeological site at Kostenki-Borshchevo (K1) was discovered in 1879, and the area has been the focus of archaeological research ever since. To date, twenty-one Upper Paleolithic open-air sites have been studied at Kostenki, and another five are known from Borshchevo (46). The sites are found stratified in fill of two main river terraces at 10-15 m and 15-20 m along the main river channel, as well as in the smaller ravines and gullies that drain the surrounding uplands (47, 48) (Fig. S1). The local Kostenki-Borshchevo stratigraphic sequence can be broadly described (following (48–53) as consisting of six main units (in stratigraphic sequence from bottom to top):

1. Chalky loam deposits (52), sometimes also described as upper alluvium interstratified with coarse slope deposits (54);
2. Lower Humic Complex/Bed (LHB): stratified loamy deposits with several humic ‘horizons’;
3. Whitish Loam (WL): homogenous whitish loam with some sub-horizontal lamination; it can include in its lower part, lenses of *in situ* or re-worked volcanic ash (Campanian Ignimbrite (CI) Y5 tephra); it forms a marker horizon that separates the Upper and Lower Humic Beds at all sites on the second terrace in the Kostenki-Borshchevo region (50);
4. Upper Humic Complex/Bed (UHB): consists of several humic ‘horizons’ separated by yellowish chalky loam;
5. Cover Loam (CL): a loess-like loam, including several humified horizons in some sites;
6. Modern chernozem: black, highly humic soil, with abundant bioturbation/burrows.

The Y5 CI tephra horizon (known as the “Paleolithic Pompeii”) is found underlying the UHB in the WL at several of the sixteen sites preserved on the second terrace (K1, 2, 6, 7, 8, 9, 10, 11, 12, 13, 14, 15, 16, 17, 18 and B5 (50, 55). This ash layer derives from the CI eruption at Campi Flegrei in Italy, independently dated to c. 39,300 calendar years ago (cal BP) (56–58), and represents a chronostratigraphic marker across parts of southern and eastern Europe as well as southwestern Asia. At Kostenki-Borshchevo, the sediments above the alluvium contain a long sequence of archeological layers of early to late Upper Paleolithic age, dating to > 42,000 to c. 14,000 cal BP (55, 59), stratified above and below the CI Y5 tephra. Most of the archeological layers represent primary buried horizons, and they include features, artifacts and fauna (49, 50, 60). The sites on the second terrace preserve early and mid-Upper Paleolithic assemblages above and below the CI Y5 tephra, in the Lower and Upper Humic Beds, including assemblages attributed to a local ‘Initial Upper Paleolithic’ tradition, the Aurignacian, the Gravettian,

and the local Gorodsovian (61). The Cover Loam (including the Gmelin Soil) is archaeologically extremely rich, including Eastern Gravettian artifacts and the famous large structure of Kostenki 1-Layer 1, dated to *c.* 29,000 cal BP (59), and the Epi-Gravettian features made of mammoth bones at Kostenki 11-Layer 1a, dating to between 19,000 and 14,000 cal BP (62, 63). Eight sites (K3, 4, 19, 21 and B1-4) are found in the soil and younger loess deposits of the first terrace (48) and preserve evidence of middle and late Upper Paleolithic occupations (64).

The Kostenki-Borshchevo sites were used recurrently for over 30,000 years, partly because of the presence of natural springs that attracted animals and people to the area. With their many features, they offer unique insights on the use of the landscape and the exploitation of the large mammals of the steppe-tundra from the earliest phases of the Upper Paleolithic onwards. In particular, the sites of K1, K12, K14 and K15 preserve concentrations of animal bones (horse in K14 and K15, reindeer in K12, mammoth in K1) that clearly indicate kill-butchery events (65). Together with the extensive, well-stratified chronological sequence covering all phases of the Upper Paleolithic, as well as the transition through the Last Glacial Maximum, the Kostenki-Borshchevo locality represents one of the key sources of information about the Upper Paleolithic of Eurasia and the Pleistocene modern human occupation of Eastern Europe.

The Kostenki-Borshchevo sites were used recurrently for over 30,000 years, partly because of the presence of natural springs that attracted animals and people to the area. With their many features, they offer unique insights on the use of the landscape and the exploitation of the large mammals of the steppe-tundra from the earliest phases of the Upper Paleolithic onwards. In particular, the sites of K1, K12, K14 and K15 preserve concentrations of animal bones (horse in K14 and K15, reindeer in K12, mammoth in K1) that clearly indicate kill-butchery events (65). Together with the extensive, well-stratified chronological sequence covering all phases of the Upper Paleolithic, as well as the transition through the Last Glacial Maximum, the Kostenki-Borshchevo locality represents one of the key sources of information about the Upper Paleolithic of Eurasia and the Pleistocene modern human occupation of Eastern Europe.

### **The site of Kostenki 14**

The site of Kostenki 14 (K14), also called Markina Gora, is located on a promontory on the south flank of the Pokrosvskii Ravine (51, 63), where the sites K1, K12 and K16 are also found. K14 was discovered by P.P. Efimenko in 1928, who worked on the upper archaeological layers of the site; in 1953, Rogachev's excavations revealed the early Upper Paleolithic layers (51, 63). The site, which is extensive and covers hundreds of meters of sediments along the ravine, has been excavated since the 1950s through a set of trenches (Fig. S2). These can be separated into a western area (where most of the old excavations have taken place) and an eastern area of the post-1998 trench from the work of Sinitsyn and colleagues (51). Four cultural layers have been identified (Fig. S3), although because of the sloping deposition of sediments, these are not all equally visible at different parts of the site. Cultural Layer I (CL I), in the Cover Loam, dates to 27,600 – 26,500 cal BP (66), although this might be a minimum age (52); CL II and CL III are found in the Upper Humic Bed, above the CI Y5 tephra and are dated to 33,600-31,500

cal BP and 35,300-33,200 cal BP, respectively(52, 67); CL IV is in the Lower Humic Bed (LHB) below the CI Y5 ash deposit and dates to 32,800-31,800 cal BP (46). On the eastern slope within the LHB two horizons, named CL IVa and CL IVb, have been documented(51, 52, 67).

The oldest archaeological layer in the eastern part of the site, CL IVb, overlies the so-called 'Horizon of Hearths' (burnt reddish loam) and is buried on the sloping margins of a paleo-gully (67). CL IVb has been dated by 14C to 42,200 - 39,900 cal BP (52), although this might represent a minimum age for the assemblage. The underlying 'Horizon of Hearths' has been dated by 14C to 42,400 - 41,000 cal BP (52) and by OSL to 47,800 - 40,400 cal BP (48). A large number of lithic artifacts of typical Upper Paleolithic character (68) were recovered from CL IVb – based on the production of blades obtained unipolarly, including end scrapers, burins, splintered pieces, bifacial-oval tools, and a substantial bone and antler tool-kit (67, 69). The assemblage includes the head of a female figurine made on a mammoth tusk, and a pendant made on a shell of a *Columbellidae* gastropod, presently restricted to the Mediterranean, and suggesting long-distance contacts to the south. A human tooth, identified as modern (68) was also found in CL IVb.

Only a few lithic artifacts and faunal remains represent the Cultural Layer in the Fossil Soil (FS), dated by 14C to a minimum of 40,800 - 37,500 cal BP. The Cultural Layer IVa ("Horse Horizon"), also below the CI Y5 tephra and dated by 14C to 39,100 - 36,000 cal BP (52), preserves the remains of over fifty horses. These were found mostly broken, although some retained the original anatomical position, and given the extensive evidence of cut-marks, are suggestive of a preserved kill-butcher event (49, 65).

In the western part of the site, CL IV is a single layer located in the LHB, where early Upper Paleolithic artifacts (unipolar blades, end scrapers, burins, and retouched flakes and blades) and bone tools (an awl made from a horse phalange and fragments of rods with various cross-sections) were found (51).

Associated with the volcanic ash deposits, an Aurignacian layer (Cultural Layer in the Volcanic Ash – LVA) was documented in the eastern area of the K14 site. The finds include personal ornaments, abundant bladelets and tools like end scrapers (68).

CL III is a small assemblage including organic and lithic industries. The bone industry includes fragments of a rod with sub-rectangular cross-section and beads made on the long bones of birds. The lithic assemblage of CL III includes blades and broad end scrapers (51) and is undiagnostic in terms of specific affinities to known traditions.

The overlying CL II is a very rich assemblage with abundant organic tools as well as a huge lithic collection. The lithic technology is a flake-dominated one, and typical 'Upper Paleolithic' blades are missing. Various 'Middle Paleolithic' tool types (side scrapers, points, and knives) are present in the assemblage, which is currently assigned to the local 'Gorodsovian'. CL II is well-known for its bone tools, decorated bones and personal ornaments. Among them are 'shovels' made from mammoth long bones (51). The uppermost layer, CL I, consists of a large assemblage of mammoth bones and lithics attributed to the 'Kostenki-Avdeevo' culture (51).

The archeological remains include animal bones, features (such as hearths), ornaments, mobiliary art, as well as bone and stone artifacts, briefly described below. They also include one of the earliest modern human skeletons known from outside of Africa.



## **The Upper Paleolithic assemblages of Kostenki 14**

The Kostenki sites preserve some of the most extensive Paleolithic records in Eastern Europe, but also show a considerable technological diversity. The different localities represent overlapping parts of a sequence extending from the very beginning of the Upper Paleolithic to its end in the region (>40,000 to 14,000 cal BP), but also indicate considerable pene-contemporary variation.

As mentioned in section S2 (*'The archaeological context of Upper Paleolithic ancient genomes'*), the early phases of the western Eurasian Upper Paleolithic (UP) are spatial and technologically complex. Three main groups of industries have been identified within the first Upper Paleolithic assemblages: the Initial Upper Paleolithic (IUP), the Aurignacian Complex (AC), and a number of industries known as 'transitional industries' or of very local character and/or undiagnostic features (e.g., (70, 71) and references therein). The latter ones are partly of unclear Neandertal or modern human association ((72) and references therein). Following Sinitsyn (46, 61), a local 'Initial Upper Palaeolithic' (IUP), an 'Early Upper Palaeolithic' (EUP) and a 'Mid-Upper Palaeolithic' (MUP) have been identified in the Kostenki-Borshchevo region. The 'IUP' is currently thought to fall into the chronological window > 40,000 cal BP and is found below the CI Y5 tephra deposits in the Lower Humic Bed (LHB). Archaeological assemblages belonging to this 'IUP' cluster are classified into two groups - those described as Spitsyanean, and the assemblage of K14-CL IVb. In the case of these two industries, which have only been described in the Kostenki-Borshchevo region and nowhere else, the label 'IUP' is largely a chronological attribution. It should be noted here that these Kostenki 'IUP' assemblages are quite different from the IUP techno-complex defined by (73) in terms of lithic technology, although further studies are needed to more precisely define these differences. The Kostenki IUP is a local description, whereas the formally defined IUP used more broadly is posited as representing a dispersal by modern humans into Europe (71, 74–78),

The EUP according to (61) is found within the chronological window between 40,000 and 34,000 cal BP and occurs below as well as above the CI Y5 tephra. Archeological assemblages within the EUP are attributed to the Aurignacian and the Streletskian traditions. While the Aurignacian is well known in most of western Eurasia, the Streletskian is a local industry, known from several sites in the Kostenki-Borshchevo locality and other regional localities. Within the schema of temporal phases of (61), the MUP dates to two separate time windows – first, between 34,000 and 30,000 cal BP, with assemblages attributed to the Gravettian and the Gorodsovian, and second, between 30,000 and 23,700 cal BP, with a range of localized traditions, including the evolved Gravettian.

In general, the Kostenki-Borshchevo region shows substantial variability in lithic industries within each phase. The co-existence of several UP techno-complexes is unique to Kostenki; some of these techno-complexes are not known outside the Kostenki-Borshchevo region (e.g., the Gorodsovian), while others are recorded all over western Eurasia (e.g., the Aurignacian). In terms of human behavior, the variability in material

culture production is poorly understood, as the meaning of these taxonomic units is unclear. It has been suggested by some (e.g., (50, 70) that the Gorodsovian could represent a functional facies of the contemporary Gravettian.

The spatio-temporal diversity of the Kostenki-Borshchevo Upper Paleolithic sequence illustrates the complex demography and mobility of early modern human populations in Eurasia, as well as preserving unique evidence of the recurrent use of particularly rich localities in the landscape of the northern plains, which may have acted as regional foci of population ranges at the time.

### **The Markina Gora skeleton**

The skeleton from Kostenki 14 was discovered in 1954 by A.N. Rogachev in a trench on the western portion of the site. The skeleton, of a relatively short man (1.60 m) aged 20-25 years old (79), has a robust skull, with strongly developed supraorbital tori, a deep infraglabellar notch, and short face (Fig. S4). The skeleton was found in a deeply flexed position on its left side with the face to the north and the hands by the face (Fig. S5). The burial pit was characterized by steep walls and an oval shape, about 99 x 39 cm (50). Its long axis was East-West oriented. The skeleton was found at its base and associated with dark red pigment (especially around the skull). The only finds with the skeleton are a few lithic flakes and animal bones. Their presence could be causally linked to the burial event or be the result of rodent activity. Based on this and the non-diagnostic nature of the flakes, no direct association with a particular Paleolithic archeological tradition at the site is possible.

The burial pit's mouth underlies and is sealed by Cultural Layer III; the pit cuts through the CI Y5 ash layer and its bottom cuts into the top of the Lower Humic Bed. Therefore, the human remains can be stratigraphically placed as younger than Cultural Layer IVa, younger than the CI Y5 volcanic ash horizon, and older than Cultural Layer III. The skeleton has been directly dated to  $33,250 \pm 500$  radiocarbon years before present (14C BP) (25) which is 38,684 - 36,262 cal BP (Fig. S6), and is thus consistent with its stratigraphic position originating above the CI Y5 tephra dated to c. 39,300 cal BP (56). The close proximity in age of the skeleton and the tephra containing artifacts attributed to the Aurignacian in the eastern part of the site (68) has led to the association between the two. However, CL III, above the skeleton, contains a more blade-based industry generally assigned to the MUP, with possible affinities with the overlying Gorodsovian (CL II). Given the diversity and stratigraphic complexity of the lithic material preserved in the early horizons at Kostenki 14, a general 'Early Upper Paleolithic/EUP' archeological context for the Markina Gora skeleton is used here.

## **S2: The archaeological context of Upper Paleolithic ancient genomes**

The context in which hominin ancient genomes should be assessed is that of human paleontology and Paleolithic archeology. The former is relatively scarce, making archeology the best indicator of past population parameters. However, as one of the main aims of current ancient genomics is to identify biological and geographical lineages, linkages to archeology are constrained by the fact that these data are not necessarily direct or simple indicators of prehistoric population distributions, contact, cultural affinities and isolation.

The relevant Eurasian Paleolithic entities – i.e. those likely to inform about Neandertals, Denisovans, other archaic populations and modern humans in Eurasia in the last 100,000 years are the Middle and Upper Paleolithic. Late Eurasian Middle Paleolithic (MP) sites are associated with Neandertals. Defined by an overall particular suite of behaviors, the MP ranges in age from over 200,000 to *c.* 40,000 cal BP (80–82), although the localised late survival of Neandertal groups until 30,000 cal BP has been reported (e.g., (83)). The Upper Paleolithic (UP) is known from *c.* 50,000 cal BP in southwest Asia and from *c.* 48,000 cal BP in Europe(71, 75, 76, 78, 84–87), although in some parts of Europe and Asia it does not become predominant until after 40,000 cal BP. The Upper Paleolithic is considered to record the modern human colonization of southwest Asia, Europe and northern Asia (although direct skeletal associations are few(72) and references therein). The transition between the two can be sharp (particularly in western Europe), but less straightforward in other places, and the presence/absence of Upper Paleolithic technologies is not necessarily a marker of modern or archaic hominins (42). It is, however, the units within each of these that provide the detailed context to which K14 and other ancient genomes discussed here genomes relate.

For tracking the dispersals of modern humans in Eurasia, the characteristics of the Upper Paleolithic are the main source of information. Terminology for the chronologically overlapping but technologically distinct parts of the first lithic assemblages identified as UP is not universal. For the purposes of the brief summary here we divide the Upper Paleolithic into three informal units that are essentially chronological – early, middle and late.

The Early Upper Paleolithic (EUP) covers the period from *c.* 50,000 cal BP to around 30,000 cal BP and encompasses a set of industries that are technologically variable. We describe here the archeological entities involved, largely defined on the basis of lithic technology, and which are relevant to the associations of the K14 skeleton. In addition to these are what have been referred to as ‘Transitional Industries’ (e.g., Châtelperronian, Szeletian, Uluzzian) (72). The position of these industries in relation to the Middle and Upper Paleolithic transition has been extensively debated, and their association with Neandertal remains in some cases (e.g. Châtelperronian) and possibly modern humans in others (e.g. Uluzzian, Lincombian) complicate interpretations even more. As these are not found at Kostenki-Borshchevo, they will not be discussed further.

What is probably the earliest of the Western Eurasian EUP is referred to as the 'Initial Upper Paleolithic' (IUP), defined technologically as a combination of Levallois production with prismatic blade elements (73). Regional variants exist, for example the Emiran in southwest Asia (88), the Bohunician in Central Europe (84), and a Siberian version known from the Altai Mountains and Baikal region (from the sites of Kara-Bom, Makarovo-4 and Varvarina Gora, for example; (89, 90). The earliest dates for the 'IUP' may be older than 50,000 cal BP in southwest Asia (Boker Tatchit, (88)), 49,000-48,000 cal BP or 47,500 cal BP in Europe [depending on whether they pre-date (71) or coincide (78, 85) with the Greenland Interstadial 12 at Bohunice], and as early as 45,000 cal BP in Siberia (89, 91). Despite these very early occurrences, most of the dates center on the period 45,000 - 40,000 cal BP (92); there is no evidence for its persistence beyond 35,000 cal BP. The industry from Kostenki 14 CL IVb (underlying the skeleton and dated to 42,200 - 39,900 cal BP, (52)) has been referred to as IUP (61) but using a different and broader definition than that of Kuhn and colleagues (73).

The key elements of the Western Eurasian 'IUP' are its very extensive geographical distribution (southwest Asia, southeastern and eastern Europe, and Central Asia), mixed technological status (i.e., persistence of Middle Paleolithic aspects in the technology), its early age and – at some sites - prolonged existence (>10,000 years). This prolonged existence might also be an artefact of dating inaccuracies. The 'IUP' has been proposed as the signal of the earliest modern human expansion into Europe and northern Asia (71, 74–78, 93). Nevertheless, the archeological record for the transition between the Middle and Upper Paleolithic is not clear-cut, revealing both geographical and spatial variation in the extent to which Upper Paleolithic elements become incorporated in lithic assemblages associated with late Neandertals (as seen for example in the Châtelperronian), or to which Middle Paleolithic aspects of the technology persist at early modern human sites (as seen for example in the 'IUP' sites).

A second element of the Western Eurasian EUP is what has been referred to as the 'Aurignacian Complex' *sensu lato*. However, the linkage between the Aurignacian *sensu stricto* and the other industries implied by the shared name is not accepted by all or fully demonstrated. The Ahmarian-Proto-Aurignacian variant (APA) is characterised by a greater dependence upon large bladelet technology than found in the 'IUP' (but lacking the specific markers of the Early Aurignacian), and includes industries like the Ahmarian from the Levant and Anatolia (94), the Kozarnikan from southeastern Europe (95), and the Archaic or Proto-Aurignacian from southern Europe (96). The APA ranges in date from c. 47,000 to 35,000 cal BP (72, 86, 94, 97, 98). These technological entities are strongly Mediterranean in Europe, with little evidence of an existence north of the Alps, but this partly depends on whether the term is broadened to include a greater range of industries. APA assemblages have also been identified as far east as the Zagros, with affinities to the Kozarnikan (99, 100).

The Aurignacian is the major, widespread EUP techno-complex of Western Eurasia. It is homogenous and unified technologically and culturally, and has been proposed as an ethnically-based entity (101). It is characterized by split-based bone points, carinated end scrapers, and retouched bladelets, and has an associated complex of mobile art and

personal ornaments. The earliest Aurignacian is found at Willendorf II dated to 43,500 cal BP (87) the youngest *c.* 32,000 cal BP (102–106). The Aurignacian is a western Eurasian phenomenon, occurring in western, central and eastern Europe, as well as southwest Asia, and it is found in both the warmer and colder parts of the continent. Kostenki is probably one of the most easterly occurrences of the Aurignacian, and the K14 skeleton occurs in a pit cut through an ephemeral, ashy layer in which Aurignacian lithics were identified in the eastern part of the site (61).

In Northern and Eastern Asia the emergence of the Upper Paleolithic is not so well-known; however, what we do know suggests a connection with parts of the Western Eurasian EUP – the IUP and the APA techno-complexes from southwest Asia and Kostenki (93, 107); but see (92)). Earliest regional cases of the northern and eastern Asian EUP include Kara-Bom in the Altai (49,000 - 45,000 cal BP), Makarovo-4 in the Cis-Baikal (>43,000 cal BP), Varvarina Gora and Kamenka in the Trans-Baikal (>40,000 cal BP), Tolbor 4 in north-central Mongolia (possibly >44,000 cal BP), and Shuidonggou in north China (43,000 - 40,000 cal BP) (89, 91, 108–112). Lithic industries from these sites center on production of blades from parallel, “flat-faced” blade cores, a Levallois-like technology albeit on simply prepared cores with smooth platforms (90, 92, 113–115). Like the EUP in western Eurasia, the lithic tool-kit is composed of distinctive endscrapers, burins, pointed blades with invasive ventral retouch, and occasional bifaces, as well as side scrapers, notches and denticulates (113). Many of these sites also contain bone, antler and ivory tools, ornaments including ostrich-eggshell pendants, ochre concentrations, occasional zoomorphic statuettes, and possibly a musical flute (116–118). These features are obviously distinctive from the region’s earlier Middle Paleolithic, and together they indicate the presence of a well-established EUP tradition across the vast steppes of inner Asia 45,000 - 35,000 cal BP. Whether modern or archaic humans created this record cannot be discerned at present, because no diagnostic human remains have been reported from any inner Asian EUP site, and the two earliest cases of supposed modern humans from Siberia (the Baigara talus, >47,000 cal BP (119) and the Ust’-Ishim femur, 45,000 cal BP (120)) were in re-deposited contexts devoid of artifacts. Nonetheless, the Kostenki genomic analysis reported here implies the existence of a widespread western Eurasian modern human population that extended eastward to Lake Baikal during MIS 3, and the inner Asian EUP may represent the archeological manifestation of that population.

The key elements of the period from about 50,000 to 32,000 cal BP (EUP) are that there is evidence for different Upper Paleolithic traditions, with quite distinctive distributions but overlapping in time. There is also evidence to suggest a considerable difference between Eastern and Western Eurasia, and a degree of convergence in technological innovations (e.g., (121)). Views differ considerably as to whether the patterns of similarities and differences among various industries that can be observed in the early phases of the Upper Paleolithic represent population dynamics, or local *in situ* and variable, convergent, adaptive change among modern human groups at the time. The homogeneity of the Aurignacian may be the one case indicative of cultural contact across a large area.

By 32,000 cal BP, there is a new form of technology, and a new widespread tradition, the Gravettian, part of the middle Upper Paleolithic (MUP). This is, like the Aurignacian, highly uniform, characterized by blades and bladelets, steeply backed, and often associated with a distinctive set of figurines. The Gravettian is widespread, from western Europe to Russia, with some indications of extending into Siberia (Mal'ta), and suggestions that it can be divided into an Eastern and Western form. The ancient genome extracted from the Ma'lta boy indicates ancestry to both Europeans and Native Americans, the latter not shared by later European Mesolithic groups.

The period of the Gravettian coincides with a major deterioration in climate that leads to the Last Glacial Maximum (LGM, 25,000 – 15,000 cal BP, with a peak at 20,000 - 18,000 cal BP). Archaeologically, the LGM *sensu lato* is associated with depopulation of northern latitudes and demographic fragmentation (Lahr & Foley 2003), with sites becoming scarce, and local traditions developing (e.g. the West European Solutrean)(122).

In Siberia, MUP techno-complexes replace those of the EUP around 34,000 cal BP, but there is much variation in lithic industries from then until the LGM. Considering only well-dated sites in the Yenisei and Baikal regions (e.g., (117, 123, 124)), bladelet technologies become much more common, with full-blown microblade inset technologies appearing just before or after the LGM. This period of climatic deterioration paradoxically is often referred to as the “Golden Age” of the Upper Paleolithic in the area, because many of Siberia’s MUP sites contain incredibly rich inventories of hearths and dwelling features, bone tools, items of personal adornment, and even small female statuettes, or “Venuses”, harkening again a connection across the mammoth-steppe to western Eurasia. The Mal'ta site represents the “type site” for this phase of the Upper Paleolithic, and for decades archeologists and biological anthropologists have hypothesized a link to the Gravettian World far to the west (125–127). Whether the Kostenki-Mal'ta connection is rooted in an eastward expansion of Gravettian-like cultures, or earlier EUP cultures (as argued above), cannot be determined without genomic data from a northern and northeastern Asian EUP individual.

From 15,000 cal BP, climatic conditions improve substantially, although not consistently, as there is a short period of low temperatures between 12,800 - 11,500 cal BP known as the Younger Dryas. The post-LGM archeological record (the Late Upper Palaeolithic (LUP)) demonstrates the re-population of Europe (128, 129) presumably from southern refugia, such as those proposed in Spain, Italy, southeast Europe and western Asia. The western Eurasian postglacial archeological record is normally divided into the late Upper Paleolithic or Epi-Paleolithic, which sees a large number of local traditions develop (Ahrensburgian, Hamburgian, Epi-Gravettian, Magdalenian, etc.), and the Mesolithic (after 10,000 cal BP), the latter being early Holocene cultural entities (e.g., Azilian, Maglemosian, Tardenoisian). These have generally been considered to represent population expansions within Europe, in contrast to the subsequent expansion of farmers from southwest Asia (Neolithic). The ancient genomes from La Braña (Spain), Loschbour (Luxembourg), and Ajvide and Motala (Sweden) are those of Mesolithic hunter-gatherers.

The main aspects of the end of the Pleistocene and the Holocene are the impact of the LGM, and the re-growth and expansion of populations as the climate warmed after 15,000 cal BP, producing an entirely new configuration of populations prior to the arrival of farmers in Europe from the Middle East and their subsequent expansion eastwards. Post-glacial hunter-gatherer populations of Europe expand from glacial refugia, and their distribution, demography and density across Eurasia would have varied considerably, producing very different interactions and genetic outcomes in different areas (*130*). In comparative terms, it is likely that the level of depopulation was higher in Western Europe than in Asia, and continuity was greater in Asia, but it should be noted that the latter is vast by comparison, and less well researched.

### **S3: Samples and laboratory methodologies applied**

#### **Samples**

The K14 sample used in this study was obtained from the **left tibia (dorsal side of the shaft)**. Note that the tibia was washed before sampling. As described in S1, the skeleton has been directly dated to 38,684 - 36,262 cal BP. According to the complete mitochondrial sequence of the tibia that has been characterized in previous ancient DNA analyses, the K14 individual belonged to mitochondrial haplogroup U2 (*131*). Two other samples, K1 and K15, were also analyzed but endogenous DNA contents and levels of contamination by modern humans were found incompatible with the characterization of the whole genome sequence by shotgun sequencing.

#### **DNA extraction**

All pre-PCR steps were conducted at the Centre for GeoGenetics, University of Copenhagen, Denmark, in state-of-the-art ancient DNA facilities dedicated to the analysis of ancient hominin remains, and separated from any building where fresh DNA or post-PCR DNA is processed. Each extraction session included a mock extraction blank where no bone powder is added to the extraction reagents.

We extracted 89 to 260 mg of bone powder per extraction session, using either a microdismembrator or low speed drill (Table S1). We first followed the extraction procedure described in (*132*), which is based on DNA binding to silica pellets in solution. We also performed extraction following the procedure described by Dabney and colleagues (*133*), which is tailored to ultra-short DNA fragments and performs DNA purification on MinElute (Qiagen) silica-columns (*133*).

When using silica pellets, we performed a pre-digestion of the sample by incubating in 5 ml digestion buffer (0.45 M EDTA, 0.25mg/ml proteinase K, 0.5% N-laurylsarcosyl) at 37°C for 30 min or 4h. After spinning 2 min at 2,000 rpm, the supernatant, representing the first fraction, was transferred into a new falcon tube. The remaining pellet was further digested for 24h at 37°C in 5 ml fresh digestion buffer. After spinning 2 min at 2,000 rpm we kept the supernatant, which represented the second fraction. Both first and second fractions were incubated with 50 µl freshly prepared silica pellets and 20 ml of binding buffer (5M Guanidinium thiocyanate, 50 mM Tris, 25 mM NaCl, 15 mM EDTA, 0.8 % TritonX-100, pH 4.0-5.0) for 3h at room temperature. The supernatant was discarded and pellets were washed twice with 1 ml of fresh 80% ethanol before eluting the DNA in 120-130 µl EB incubated 30 min at 37°C.

For the silica column-based approach (*30*), we pre-digested the sample in 1mL extraction buffer (0.45M EDTA, 0.25mg/mL proteinase K) for 1h at 37°C. After centrifugation for 2 min at 16,000g, we discarded the supernatant and incubated the pellet for 36 h at 37°C in 1mL of fresh extraction buffer. After centrifugation for 2 min at



13,000 rpm, we transferred the supernatant mixed with 13 mL of binding buffer (5M guanidine hydrochloride, 40% isopropanol, 0.05% Tween 20, 90 mM sodium acetate) on a Zymo-Spin V reservoir (Zymo Research) fitted on a MinElute column (Qiagen). The reservoir-MinElute device was centrifuged at 3,000 rpm for a total of up to 8 min. The MinElute column was then placed on a collection tube and centrifuged at 6,000 g for 1 min. The column was washed twice with 750 µl PE and dry-spin at 13,000 rpm. The DNA was eluted twice in 28 or 35 µl EB after 10 min incubation at 37°C.

All extracts were stored at -20°C in siliconized tubes. Each of the following steps (methylated DNA enrichment, USER treatment, library building and library PCR enrichment) was accompanied by a negative control where the sample is replaced by EB buffer, until the library-building step. Interestingly, DNA libraries constructed on USER-treated extracts generated following in-solution DNA purification showed higher variance in endogenous DNA content (average = 0.820%, range = 0.117-8.029%) than those constructed on USER-treated extracts obtained following purification on silica-columns (average = 0.308%, range = 0.296-0.485%).

### **Methylated DNA enrichment**

It has been recently shown that methylated cytosines can survive after death and be characterized either directly (134, 135) or indirectly by exploiting patterns of post-mortem DNA degradation (136, 137). Methylated cytosines can be used as targets for enriching DNA extracts in DNA fragments of vertebrate origin, and therefore preferentially get access DNA material of human origin. Microbial DNA indeed often dominates ancient DNA extracts, but generally do not show high-densities of 5methyl-cytosines (<sup>5m</sup>C) at CpG sites in contrast to human DNA. Therefore, we attempted to enrich a fraction of our DNA extracts for <sup>5m</sup>CpG sites using the EpiMark Methylated DNA Enrichment kit (NEB, reference E2600) following the manufacturer's instructions, except for the slight modifications described below. A total of 50 µl of DNA extract was incubated for 20 min at room temperature with 10 µl of pre-bound MBD2-Fc to Protein A Magnetic Beads, in a total volume of 100 µl 1X Bind/Wash Buffer. Beads were concentrated using a magnetic rack and the supernatant, containing the un-methylated DNA fraction, was discarded. Beads were washed twice with 950 µl of a 0.4M KCl solution and methylated DNA was eluted in 150 µl of 1M KCl, after 5 min incubation at room temperature on a rotor. Samples were purified on a MinElute column and eluted in 32.5 µl EB after 15 min incubation at 37°C, and further processed for USER treatment.

### **USER treatment**

We removed the most frequent *post-mortem* DNA damage from 11 out of the 13 DNA extracts (previously enriched or not for methylated DNA), namely cytosines that have been deaminated into uracils, following incubation with Uracil DNA glycosylase and DNA glycosylase-Lyase Endonuclease VIII, as proposed in (137). More specifically, a volume of 32.5 µl of the ancient DNA extract was incubated with 10 µl of USER enzyme mix (1U/ µl, NEB reference M5505) for 3h at 37°C. If not processed

immediately for sequencing library building, the repaired DNA solution was stored at +4°C for no more than 16h.

### **Library building and sequencing**

Illumina sequencing libraries were built following a protocol described in (138) and based on an end-repair step of 21.25 µl of the DNA solution, a ligation step with 12.5 pmol blunt-ended adapters (139) and an adapter fill-in step. We used the NEBNext DNA Library Prep Master Mix Set for 454 (NEB reference E6070) without the ssDNA isolation module. Libraries were enriched and indexed by performing 8 to 14 PCR cycles in 50 µl reactions using 5U of the AmpliTaq Gold DNA polymerase (Life Technologies) as described in (140). After purification on MinElute columns and elution in 20 µl EB following 15 min incubation at 37°C, library concentration and size were checked on a Bioanalyzer 2100 High-Sensitivity Assay (Agilent). Whenever concentrations were not directly compatible with Illumina sequencing, the purified PCR product was re-amplified in four parallel 50 µl reactions for 6 or 8 additional cycles, before being pooled, purified and checked on the Bioanalyzer again.

Final libraries were pooled with non-human indexed samples and sequenced 100SR or Rapid 75PE at the Danish National High-Throughput DNA Sequencing Centre, University of Copenhagen, Denmark, on a HiSeq 2500 (Illumina).

#### S4: Read processing and mapping

Illumina reads were processed and aligned to the human reference genome hg19 available from the UCSC genome browser (<http://hgdownload.cse.ucsc.edu/goldenPath/hg19/chromosomes/>) using the PALEOMIX pipeline (*141*) with default parameters, except for the minimal mapping quality threshold, which was set to 30, and seeding, which was disabled. PALEOMIX implements in an automatic manner all the analyses described in (*132, 142*), which enabled previous characterizations of ancient and modern genomes. Briefly, Illumina sequencing reads were trimmed for adapter sequences using AdapterRemoval (*143*). When overlapping for at least 11 nucleotides and with a maximal edit distance of 1, paired-end reads were collapsed and base quality-scores at overlapping positions were recalculated using the quality scores of both reads at each overlapping position (*132*). Collapsed reads were further treated as single-end reads. Trimmed reads and collapsed reads were aligned against hg19 using bwa version 0.5.9-r26-dev (*144*), filtered for duplicates and re-aligned around indels using GATK (*145*). Uncollapsed read pairs were filtered from the final BAM alignment file, as this fraction corresponds to relatively long templates and is therefore likely to be enriched in contaminating templates of modern origin. We repeated the full procedure to generate read alignments against the revised Cambridge reference mitochondrial sequence (rCRS, Accession Nb. = NC\_012920). Summary statistics, including the total number of Single End (SE) and Paired-End (PE) reads generated, endogenous DNA content per library (the fraction of high-quality hits mapping uniquely against the reference genomes considered), and the contribution of each library to the final coverage estimate, were directly obtained from PALEOMIX (Table S2).

The existence of nucleotide mis-incorporation and DNA fragmentation patterns, which represent the signature of post-mortem degradation reactions (*33*) was investigated using alignment BAM files and mapDamage2 (*146*) DNA libraries that were not USER-treated showed a progressive decline of C→T substitution rates from read starts, mirrored by a progressive increase of G→A substitution rates towards read ends (Fig. S7). Additionally, genomic positions preceding read start coordinates were found to be enriched in purines, particularly in Guanine residues. Genomic positions following read end coordinates were found to be enriched in pyrimidines, particularly in Cytosine residues. This is in agreement with previous reports, suggesting depurination as the main driver for post-mortem DNA degradation. Read alignments from USER-treated DNA libraries showed C→T and G→A mis-incorporations restricted mostly to read-starts and read-ends (Fig. S8), in line with previous observations suggesting low base excision performance for bases located at the very ends of ancient DNA molecules (*139*). The base composition of the genomic coordinate preceding read-starts was enriched in cytosine residues, as expected from the enzymatic fragmentation performed, which takes place 3' of uracil residues. Overall, this indicates that USER treatment significantly reduced the level of nucleotide-misincorporations resulting from post-mortem DNA decay.

## **S5: Mitochondrial DNA analyses**

We used high-quality hits against the rCRS mitochondrial genome to reconstruct the mitochondrial sequence of the K14 individual. Briefly, we generated a VCF file to identify sequence variants using samtools and bcftools (*147*), and called a final mitochondrial consensus sequence based on a majority rule and requiring a minimal depth-of-coverage of 3. The mitochondrial sequence was identical to the one previously reported by Krause and colleagues (*33*), thus providing independent replication of our results and supporting the authenticity of the data generated. We then mapped all sequence reads against the K14 mitochondrial sequence using PALEOMIX and the methods described above. This provided one of the two input files for contamMix (version 1.0-10). This software was kindly provided by Dr. Philip Johnson and implements the procedure described by Fu and colleagues (*148*) to estimate the level of DNA contamination based on mitochondrial read alignments, assuming that the data consists of a mixture of endogenous sequence reads and contaminants. The second input file used by contamMix consists of an alignment of 311 whole mitochondrial genomes described in (*33*) appended with the K14 sequence. Contamination levels were estimated using 4 MCMC chains of 50,000 iterations each. Contamination levels estimated on libraries showing less than 100 mitochondrial hits should be disregarded, as not enough information was available to achieve proper estimates. The contamination level of the 8 libraries that were chosen for downstream analysis are shown in (Table S3).

## **S6: Error and X-based contamination estimation**

The error rate was estimated by using a method similar to (149). This method is based on the assumption that the number of derived alleles is the same for all individuals. By comparing the sample of interest and a ‘high quality’ sequenced individual to an outgroup (the chimpanzee), the number of derived alleles can be assessed. The excess of derived alleles in the sample of interest can then roughly be interpreted as relative error rates. For a high quality sample we used an individual from the 1000 genomes project (NA12778.mapped.ILLUMINA.bwa.CEU.low\_coverage.20130415.bam). After removing reads with a mapping quality below 35 and base quality below 35, a single base was sampled for each position of the high quality genome. We estimated both the type specific error rates and the overall error rates (Fig. S9) for all USER libraries. For this analysis we discarded reads with a mapping quality below 30 and bases with a quality score below 20 (0.1% and 1% error rate respectively). The method is described in details in the supplementary of (132), and is implemented in the software ANGSD.

From Fig. S8 we observe that the USER treatment still has increased error rates for the first base pairs in each end. We therefore applied our error estimation by discarding the first 1 to 5 base pairs from each end (Fig. S10). Which shows decreasingly lower error rates and we therefore used the five base pair trimmed version of the data in all subsequent analysis. We also estimated the type specific error rates for all ancient samples (Fig. S11) and the overall error rates (Fig. S12). The analysis was performed using the software ANGSD.

## **X chromosome-based DNA contamination estimation**

We estimated contamination of the Kostenki sample using the method described in (150). This method works for chromosomes that exist in one copy for which we would expect to observe a single base for all sites. Hence for male human samples, like the Kostenki sample, it can be applied to the X chromosome. If multiple different base types are observed at a site, it is interpreted as either the result of sequencing errors or contamination. However, note that human contamination can only cause base discordance at polymorphic sites, whereas it can be assumed that sequencing errors lead to the same discordance rate in polymorphic sites as in their neighboring non-polymorphic sites. For this reason, presence of human contamination will cause an excess base discordance in polymorphic sites compared to their neighboring non-polymorphic sites. The estimation method we used for our analyses takes advantage of this logic: it estimates the extent of contamination based on a comparison of base discordance in a set of known polymorphic sites on the X chromosome to the base discordance rates in the 8 nearest sites to each of polymorphic sites; 4 sites to each side. For more details about the method see the supplementary of (150).

The set of known polymorphic sites used in our analyses was identified using 60 unrelated CEPH individuals from the HapMap phase II release 27 data (151). The set was pruned such that no polymorphic sites were less than 10 bases apart. Allele frequencies were also estimated in these individuals.

Before performing the analyses the following filtering was applied to the Kostenki sample:

- The X chromosome was trimmed to remove the regions that are homologous with the Y chromosome (first and last 5Mb).
- The sites were then filtered based on mappability (100mer), so that no region will map to another region of the genome with an identity above 98%
- Reads with a mapping quality score of less than 30 and bases with a base quality score less than 20 were removed.
- Sites with a read depth of less than 2 or above 40 were removed

The analyses were performed using ANGSD and gave contamination estimates of 2.0% when using all reads (Method 1) and when sampling a single read for each site (Method 2), respectively (Table S4).

Contamination was also estimated for the samples Loschbour, Motala2, Motala 3, Motala6, Motala9 and Motala12 (Table S5) using the same approach. It was not possible to do so for the samples LBK, Motala1 and Motala4, because they are females. Based on (1) the endogenous content (Table S2), (2) the error rates per library (Fig. S9), the contamination estimates from both the X-based and the mitochondrial analysis we choose eight libraries for downstream analyses.

### **S7: Y chromosome analysis**

We used three publically available datasets (152–154), to infer the chromosome Y haplogroup for K14 (Fig. S13, Table S6). Each dataset consists of a table of SNPs that are phylogenetically informative for a particular haplogroup (hg). For each SNP in the datasets, we then determined whether K14 carries the derived allele by selecting the most frequently occurring base from all covering reads, discarding reads with a mapping quality score below 30 and a base quality score below 30.

For the data from (152) and (153), the informative SNPs are mutations on the branches of the phylogenetic tree relating the individuals sequenced in the respective studies. They therefore do not necessarily reflect diagnostic mutations for a particular haplogroup defined in ISOGG. Nevertheless, they allow us to determine the likely branching point of K14 simply by counting how often K14 matches the derived allele at each branch in the tree. Results for both of these datasets clearly show that K14 carries the derived alleles for all SNPs on branches ancestral to hg C, but ancestral alleles for the branches leading to more derived haplogroups (Fig. S13). Furthermore, K14 carries the derived allele for four hg C mutations in ISOGG (P255, V183, V199, V232) (Table S6). The MHG

individual from La Braña (22) carries the same derived mutations, suggesting that both are members of a closely related lineage within hg C.

## **S8: Array genotype and whole genome reference data**

### **Array genotype data:**

We included as reference dataset the HGDP data (155) and several other datasets (127, 156–162) that were publicly available from the Estonian Biocenter for download (<http://evolbio.ut.ee>). We restricted all analyses to populations that had at least 3 individuals. This joint dataset had 2061 individuals from 167 contemporary human populations, and, when combined, gave rise to 514,968 SNP sites.

### **Whole genomes:**

For the modern genomes, we used the VCF files (called genotypes) from two studies (34, 127).

For the ancient genomes we combined data from (127, 163–165), i.e., data for the following individuals: MA1, Lorschbour, La Brana, Motala, Ajv58, Gok2, Iceman, Stuttgart.

When analyzing the whole genomes jointly, we discarded sites that were invariant in the high depth genomes.

### **Merged genotype and whole genome data:**

For both array and whole genome datasets, we merged all ancient genomes with the genotype data by using SAMtools (147) and by sampling a random read for each ancient sample for each SNP position, discarding reads with a mapping quality score below 30 and a base quality score below 30, as well as alleles that did not match either of the observed alleles in the reference datasets.

These datasets were used for model-based clustering analyses (SOM section S10), Principal Component Analyses (SOM S11), the calculation of  $D$ -statistics,  $f_3$ - and  $f_4$  statistics (SOM section S9), TreeMix (SOM section S12), as well as for identifying genomic blocks of archaic hominin origin. (SOM section S13).



### S9: Analysis of shared ancestry between K14 and modern populations with $f_3$ , $f_4$ and $D$ statistics

#### “outgroup” $f_3$ and $D$ -statistics reveal that K14 is most closely related to Northern Europeans

We computed an ‘outgroup  $f_3$ -statistic’ to obtain a statistic that is informative of the genetic relatedness between a particular sample and each modern population in a reference set. A positive deviation from zero is a function of the shared genetic history of two populations  $A$  and  $B$  in their unrooted history with the outgroup  $O$ . We used the estimator suggested by (36)

$$f_3(O; A, B) = \frac{\sum[(k_O - k_A)(k_O - k_B) - \hat{h}_O/n_O]}{\sum 2\hat{h}_O}$$

where

$$\hat{h}_O = \frac{k_O(n_O - k_O)}{n_O(n_O - 1)}$$

and  $k_O$  is the count of allele 1 (arbitrarily chosen) in the outgroup,  $k_A$  and  $k_B$  are the counts in populations  $A$  and  $B$ , and  $n_O$  is the total number of alleles in the outgroup at a particular SNP, summed over all SNPs. Standard errors for the  $f_3$  estimates were computed with a jackknife approach using blocks of 5Mb as suggested in (36).

We computed this statistic with the K14 individual as population  $A$ , one of 167 contemporary populations as  $B$  and an African population, Mbuti Pygmy as  $O$ . Europeans (Fig. 1C;1D), and in particular Northern Europeans, show the greatest affinity to K14, with a lesser degree of affinity in Central Asians (Fig. S14). When K14 is directly compared to other ancient individuals, using  $f_3$ (Mbuti Pygmy; K14, Ancient), MHGs (Loschbour, La Braña) had the highest affinity to K14, suggesting shared ancestry of these ancient individuals with K14 (Fig S14). We also repeated the “outgroup”  $f_3$  analysis for each ancient individual. Overall, the patterns of shared ancestry for K14 are similar to those observed for MHGs (La Brana, Ajv58, Loschbour) and MA1 (Fig. S15), except for the latter’s additional strong genetic affinity with Native Americans, which is unique to that genome.

We further explored the relationship between K14 and contemporary populations by computing  $D$ -statistics (36),

$$D(A, B; X, Y) = \frac{\sum[(p_A - p_B)(p_X - p_Y)]}{\sum(p_A + p_B - 2p_A p_B)(p_X + p_Y - 2p_X p_Y)}$$

where  $p_A$ ,  $p_B$ ,  $p_X$ , and  $p_Y$  are the frequencies of allele 1 (arbitrarily chosen from the two alleles present) in populations  $A$ ,  $B$ ,  $X$ , and  $Y$ , summed over all SNPs. Standard errors

for the  $D$  estimates were jackknifed over 5Mb blocks. Comparisons involving multiple ancient genomes were restricted to transversion polymorphisms.

We computed this statistic with Mbuti Pygmy as  $A$ , K14 as  $B$ , and all possible pairs of contemporary populations as  $X$  and  $Y$ . This analysis confirmed K14 to be significantly closer to Europeans than populations from other geographic regions (e.g.,  $Z = 12.1$ , (Han, Lithuanians); Table S7), in all datasets (Table S7-S9). Within Europe, Northern Europeans also appear significantly closer to K14 than southern Europeans ( $Z = 6.7$ , (Sardinians, Lithuanians)) (Tables S7; Fig. S16).

***f-statistics results are robust to contamination from modern humans***

We used two complementary approaches to confirm that the key results described above are robust to contamination from modern DNA. First, we repeated the “outgroup”  $f_3$  analysis on a dataset filtered for reads of likely ancient origin using PMDTools (166). The model implemented in PMDTools relies on post-mortem DNA damage substitutions (C>T / G>A) to calculate a score for the likelihood of a read to originate from an ancient DNA molecule. Since the K14 libraries were treated with USER to reduce the level of nucleotide misincorporations, we used an untrimmed BAM file to maximize the amount of data available for this analysis. Filtering reads with PMD scores  $> 3$ , we obtain 49,050 SNPs for the merge with the reference dataset, corresponding to a  $\sim 10$  fold reduction compared to the full dataset. Despite this significant reduction, we find that “outgroup”  $f_3$  scores for the filtered BAM are highly correlated with the full dataset for all test populations. The only exception is specific to the Iceman, which appears slightly off the slope formed by the other populations (Fig. S17).

Second, we calculated contamination-corrected  $D$ -statistics of the form  $D(\text{Mbuti Pygmy}, \text{K14}; \text{Sardinians}, \text{Lithuanians})$  following (127). Assuming that the contamination originated from an individual with Russian ancestry, we estimated  $D_{\text{corrected}}$  as

$$D_{\text{corrected}} = \frac{D_{\text{K14}} - cD_{\text{Russian}}}{1 - c}$$

where  $c$  is the rate of contamination,  $D_{\text{K14}}$  is the statistic obtained with K14, and  $D_{\text{Russian}}$  is the statistic obtained using a randomly sampled individual from the Russian population instead of K14. Fig. S18 shows the result for  $D_{\text{corrected}}$  for contamination rates up to 0.5, demonstrating that even substantially higher rates than the one observed have only marginal effects on the value of the statistic. Intuitively, the reason for the negligible effect is that the value of  $D_{\text{Russian}}$  (0.019) is not much greater than  $D_{\text{K14}}$  (0.011), which means that large values of  $c$  are necessary to cancel out the signal of  $D_{\text{K14}}$ .

***Contemporary non-Africans are closer to MHGs and MA1 than K14.***

We calculated  $D$ -statistics of the form  $D(\text{Mbuti Pygmy}, \text{Modern}; \text{Ancient}, \text{K14})$ , to test whether K14 and an ancient individual form a clade with respect to a modern population. We find that all contemporary non-Africans, except Australo-Melanesians, are closer to either Mal'ta (MA1) or MHGs than to K14, whereas they are equally distant to NEOL and K14 (Fig. S19; Tables S10-S11). A parsimonious explanation would be

gene flow from a previously suggested “basal Eurasian” lineage associated with Neolithic farmers into K14, consistent with results from the model-based clustering (SOM S10).

#### **$f_4$ and “admixture $f_3$ ” statistics show HG ancestry in Siberians from Yenisei basin**

We used  $f_4$  statistics of the form  $f_4(\text{Sardinian}, \text{Ancient}; \text{Modern}, \text{Papuan})$  to measure whether a modern population shares more alleles with contemporary Europeans or an ancient genome. We find that all Siberian and East Asians are equally distant from western MHGs (Fig. 3D, Table S12), supporting the postulated early split between East Asians and western Eurasians. In contrast to MHGs and MA1, many Siberian populations are genetically closer to contemporary Europeans (Sardinians) than to K14 ( $3.1 < |Z| < 9.9$ ), particularly those from the Yenisei and Ob’ basins (e.g. Shors,  $Z = 8.0$ ) (Table S12). Furthermore, these populations derive parts of their ancestry from a European “hunter-gatherer” (HG) component inferred in the ADMIXTURE analysis (Fig. S20), with populations showing higher “HG” ancestry proportion also being closer to contemporary Europeans using the  $f_4$  statistic (Spearman  $\rho = 0.96$ ,  $p = 3.0 \times 10^{-18}$ , Table S13).

To formally test for admixture in the modern Siberian populations, we calculated “admixture”  $f_3$  statistics of the form  $f_3(\text{Test}; A, B)$  as described above (replacing the outgroup with the test population). A significantly negative value of this statistic is evidence for admixture in the test population related to two source populations A and B. We calculated the statistic for all pairs of source populations A and B, which also allows to infer which pair of populations are the best proxies for the mixing populations, i.e. which pair shows the lowest value of  $f_3$  (163).

For populations from the Yenisei and Ob basins, we find significant evidence for admixture with a variety of Siberian and European source populations (Table S14). The best pair of source populations (i.e., the most negative  $f_3$  statistic) involves Swedish MHGs (Motala, Ajev58) and Evens (a northeast Siberian population) (e.g.  $f_3(\text{Shors}; \text{Evens}, \text{Motala}) = -0.012$ ,  $Z = -9.1$ ). Altogether, these results suggest that contemporary Siberian populations from the Yenisei basin derive part of their gene pool from a Eurasian HG population that shares ancestry with K14, but is more closely related to Scandinavian MHGs than to either MA1 or western European MHGs, indicating gene flow between their ancestors and Scandinavian Europe after K14 but prior to the Mesolithic ( $36.3 > x > 7$  ka BP).

#### **$f_4$ – ratio statistics for Neandertal ancestry**

$f_4$  – ratio statistics were used as previously described by (34) to obtain estimates of Neandertal ancestry for all individuals (Table S15-S16), using Mbuti Pygmies as an African population without Neanderthal admixture. We estimate  $< 2\%$  of Neandertal ancestry for most individuals, as previously reported (167). However, we found slightly elevated levels both in La Braña and K14, with an estimated  $2.4 \pm 0.4\%$  in K14 (see also Fig. 4A). We then restricted this analysis to genomic regions without evidence for Neandertal introgressed haplotypes in modern humans, following the coordinates of

archaic tracts identified in (168) – labeled *akey* in Table S17-S18 - and (167) – labeled *reich* in the Table S17-S18 - and found 0% estimated ancestry for most individuals. For K14 we still detected  $0.9 \pm 0.4\%$  Neandertal ancestry. Our interpretation is that this is the result if the presence of longer introgressed haplotypes in K14, due to its closer temporal proximity to the admixture event (see SOM S13).

## **S10: Model based clustering of K14 and other ancient individuals**

### **Methods**

We used a maximum likelihood based approach (ADMIXTURE, (169)) to reveal the relationships of K14 and other ancient genomes to modern human genetic diversity in Eurasia and the Americas (see section SOM8 for a description of data processing and data sources). We ran ADMIXTURE assuming 2 to 15 source populations ( $K=2$  to  $K=15$ ) with 10 replicates each using only the data from contemporary populations. The best of each set of 10 runs, based on the Log-likelihood estimates, is plotted in Fig. S20. Ancient individuals, including K14, were not included in the runs; the cluster membership proportions for these individuals were inferred afterwards using their genotypes and the ancestral allele frequencies for each cluster (see (170) for details).

### **K14 has four major components, two predominant in contemporary Europeans and two in contemporary Asians**

At  $K = 9$ , K14 comprises four major components (Fig. 1B). The largest component belongs to the same ancestral cluster that is predominant in contemporary Eastern Europeans as well as all European MHGs. However, K14 also includes a sizeable component that characterizes contemporary Middle Eastern populations and Neolithic ancient genomes (Gok2, Iceman, Stuttgart), as well as two Asian components, one predominant in contemporary Central Asians and one in Southern Asians, analogous to the ones seen in MA1 (Fig. S20).

## **S11: Principal Component Analysis**

### **Methods**

Principal Component Analysis (PCA) was used to place K14 in the range of present-day and past human diversity. For each ancient genome, we randomly selected one read at positions that overlapped with SNPs present in the modern reference panel. We then randomly sampled a single haploid genotype from each modern individual to prepare a final matrix including only haploid genotype data across all individuals. For each ancient genome, Principal Component Analysis (PCA) was performed on the matrix of haploid genotypes for all SNPs with data in the ancient individual, using the R function `svd`. These individual PCAs were then combined using procrustes transformation, as implemented in the R package `vegan` (<http://cran.r-project.org/web/packages/vegan/index.html>). PCA plots were generated using R 3.0.2 (R Development Core Team 2011) and projections on the first 2 components are provided in Fig. S21-S23.

### **Results**

We found that MHGs and Neolithic farmers cluster with Northern and Southern Europeans respectively, while the UP MA1 fell outside contemporary variation towards Native Americans, as previously described (127). K14 was also found to fall outside the range of contemporary European variation, but was distinct from MA1, clustering most closely with Central Asian populations. (Fig. S21-S23)

## **S12: Treemix**

### **Methods**

Admixture graphs for the whole genome datasets were inferred using TreeMix (171). We ran TreeMix considering up to 10 migration edges, choosing the best out of 5 replicates for each edge, and without sample size correction (-noss option). The block size for the estimation of the covariance matrix was 1000 SNPs. We forced two migration edges following the results from (127, 149), describing gene flow from MA1 into Native Americans and from Denisovans into Papuans (options -cor\_mig and -climb). TreeMix output was plotted with the TreeMix R functions and the total fraction of the variance explained by each model was estimated using the get\_f() R function. This ranged from 99.64% (m=2) to 99.85% (m=10).

### **Results**

The tree topology resulting from TreeMix, including all ancient humans previously characterized at the genome level, places K14 basal to a pan-Eurasian group in the Prufer et al dataset, but as a sister group to MA1 in the (127) (Fig. S24-S25). For 4 migration edges and above, TreeMix identifies gene flow between Swedish / Western MHG and MA1, supporting genetic affinities between both groups, in line with previous reports (20) and our own analyses. Additionally, K14 showed evidence of gene flow into the ancestral node of the two Neandertal genomes currently available. This most likely reflects the presence of longer Neandertal tract identified in the K14 genome (SOM S13). For 6 migration edges and above, K14 grouped together with MA1, still occupying a basal position with respect to the modern populations listed above and all ancient human genomes. We note however that those results should be treated with caution, since we have not investigated thoroughly the effect of using genomes with heterogenous and high error rates (SOM S6). Furthermore, the variance explained is already high with the two forced migrations, and multiple population pairs are exhibiting increased residuals, which could indicate possible overfitting for the remaining migration edges.

### **S13: Archaic hominin genomic tracts**

Genomic tracts from archaic hominin origin (Denisova, Altai Neandertal) were identified scanning ancient human genomes for runs of consecutive archaic alleles, restricting to sites where all African individuals present in our reference panel were homozygous ancestral. We furthermore required that the respective other archaic hominin was also homozygous ancestral, in order to minimize false positive tracts due to shared ancestry of Neandertal and Denisova. To ensure results are comparable between ancient and modern genomes, we randomly sampled a single allele at each site for each diploid modern genome. Archaic tracts were defined as runs of archaic alleles, allowing a maximum gap size of 100 kb between consecutive alleles. Furthermore, to allow for missing archaic alleles due to lack of read coverage or randomly sampling the ancestral allele at heterozygote genotypes, we allowed up to 13 ancestral alleles between consecutive archaic alleles (corresponding to a binomial sampling probability of  $< 10^{-4}$ ) (Fig. S26).



## S14: Testing for additional archaic introgression

A qualitative assessment of the low-coverage Kostenki genome suggests there are short (1-100 Kb) regions where the Kostenki 14 (K14) genome falls outside the range of contemporary human genetic variation. One potential explanation for this observation is prior admixture between an unknown (and unsampled) archaic human population and the ancestors of K14. To test this possibility, we sampled a randomly chosen read for each location where K14 had coverage. We then tabulated a list of all locations where the K14 allele did not match the human reference sequence (hg19). We then filtered out all locations where either hg19 or the ancestral allele had missing data, sites where the ancestral allele did not match either the K14 allele or the hg19 allele, and locations that contained SNPs in a panel of 42 unrelated high-coverage modern human genomes sequenced by Complete Genomics (<http://www.completegenomics.com/public-data>). This resulted in a list of 1.47 million potential K14-specific SNPs. The sites on this list could arise from four main causes:

1. Sequencing errors in the K14 reads
2. Errors caused by postmortem DNA modifications in the K14 reads
3. True private polymorphisms under a model without ancient admixture
4. Private polymorphisms due to introgression from a diverged archaic human population (i.e., ancient admixture)

While Illumina sequencing errors are known to correlate with local sequence content (172, 173) as a first-order approximation they are randomly distributed across the genome (see also below). Similarly, we know something about errors due to post-mortem DNA damage (31) but these too are roughly randomly distributed across the genome since each individual read is short.

To assess how K14-specific polymorphisms would be distributed under different demographic models, we modified a standard coalescent simulator (174) to allow for sampling of ancient and modern DNA sequences. We then ran simulations to quantify the correlation in locations of Kostenki-specific mutations under a simple demographic null model. In general, we found that beyond a scale of ~1 Kb, the locations of these mutations were essentially uncorrelated. In contrast, under models that included ancient admixture between modern humans and a diverged archaic human population, simulations produced clusters of K14-specific mutations, with the size of the clusters inversely related to the time of admixture. We then scanned the genome for short regions with elevated numbers of K14-specific mutations.

We partitioned the genome into non-overlapping 1 Kb windows and tabulated the number of K14-specific mutations for each window. We then tabulated all regions that were 5 Kb or longer that contained an average of 6 Kostenki-specific mutations or more per Kb. This led to the identification of 161 candidate regions (excluding the MHC), with an average length of 10.4 Kb. To assess the approximate significance of these regions, we repeatedly permuted the counts of the number of K14-specific mutations

across windows and tabulated how frequent it was to obtain regions that satisfied the criteria described above. We conservatively excluded windows with no K14-specific SNPs from these permutations to account for the uneven distribution of sites with no K14 sample coverage across the genome. In all, genome-wide simulations produced an average of 18.4 regions (average length 6.8 Kb) that fit the test criteria.

Finally, to further test whether our initial assumption that sequencing errors are randomly distributed across the genome, we compared the coordinates of our 161 candidate regions with a list of ~400,000 genomic locations where duplicate Illumina whole-genome sequence data from the same individual had discrepant genotype calls (without standard filters and with a genotype quality cutoff of  $GQ \geq 20$ ; cf. (175)). We filtered out all candidate regions that contained one or more of these discrepant genotype calls. 121 regions failed this filter, with each containing an average of 97 discrepant genotype calls (null expectation of random locations for these Illumina sequencing errors would lead to ~1.2 per region). This left 40 candidates for ancient introgression, with an average length of 6.0 Kb. Given the uncertainty in our assumptions regarding the baseline distributions of sequencing errors and post-mortem DNA damage, and the small size of the identified regions, we do not believe these observations are necessarily inconsistent with a null model of no admixture.

We conclude that any introgression with an unsampled archaic human population, while theoretically possible, has left a negligible trace in the sampled K14 genome.

### S15: Estimating Neandertal admixture time

We used a new Hidden Markov Model (HMM) method to estimate admixture times and admixture proportions using maximum likelihood (ML). This method will be described in detail in a forthcoming paper, together with extensive simulations evaluating the method. Here we provide a brief summary of the method:

The method is similar to previous methods (176, 177), but differ from these in several important aspects as detailed below. The HMM has two states,  $S_N$  and  $S_H$ , representing segments of the haploid genome of Neandertal and human origin, respectively. The objective is to estimate parameters of this two-state HMM and to use subsequent posterior decoding to infer admixture tracts. In contrast to some previous methods (167), the emission probabilities are not estimated using simulated training data, but are instead estimated directly from observed data. The algorithm therefore has two steps. In the first step emission probabilities are estimated from the 1000 Genomes Project (178). We consider only two possible type of emissions: (A) Sites variable in humans (phased 1000 Genomes v.2) in which the focal haplotype has a derived allele as determined by the 4-way EPO alignments, in which Neandertals contain at least one derived allele as well, and in which all reference African populations are invariant ancestral. (B) Variable sites (including Neandertals) that do not fulfill the conditions in (A). Invariable sites and sites that do not have information to determine if condition (A) is true are considered missing data. The HMM is then applied to these data, after removing sites in linkage disequilibrium, by multiplication of the likelihood function among individuals, using transition probabilities given by (179). The likelihood function is calculated using standard algorithms and optimized using the BFGS algorithm in (180). Notice that individuals may not be independent, they may share the same tracts. However, the estimator should still perform well as a composite likelihood estimator for obtaining point estimates. Using this method we obtain emission probabilities of 0.0155 and 6.67e-9 for observations of type A when in the Neandertal and human state, respectively.

The second step is then to estimate transition probabilities in K14 using maximum likelihood (ML) on the same set of sites as those used for estimating emission probabilities. The transition probability estimates directly provide ML estimates of the admixture proportion and the time of admixture in number of generations (by the invariance principle of maximum likelihood). In particular, the rate of transition from  $S_N$  to  $S_H$ ,  $a_{NH}$ , can be converted to an estimate of the admixture time using the following equation:

$$a_{NH} = m(t-1) \text{ per Morgan,}$$

where  $m$  is the admixture proportion, and  $t$  is the admixture time in generations (179). There is an implicit assumption here of an exponential distribution of admixture tract lengths; an assumption that is not quite true but which should work reasonably well for the levels of divergence and admixture considered here (see (181) for a discussion of this issue). To enable application to the low-coverage, unphased aDNA, we consider a modified state space in which we only use at most one read for the K14 individual for each position. When more than one read is available for a position, we sample one uniformly at random. As a first approximation, we then assume that K14 is not homozygous for a Neandertal segment any place in the genome. The state space is then

reinterpreted as having two states: a state in which K14 is heterozygous for a Neandertal haplotype ( $S_N^*$ ) and a state in which both alleles in K14 are of human origin ( $S_H^*$ ). The emission probability for state  $S_H^*$  is then identical to the previously described emission probability for  $S_N$ . However, for state  $S_N^*$ , the emission probabilities are obtained as a 50:50 mixture between those of  $S_N$  and  $S_H$  in the previous analysis. Sites that are invariable in the 1000G data are considered missing data. This largely eliminates the effect of errors, and also eliminates the effect of unique mutations on the K14 lineage, ensuring that the previously estimated emission probabilities are applicable to the K14 individual. Using these methods we obtained an estimate of the admixture time of approx. 16,600 years before the sample was deposited, using a generation time of 29 years and a recombination rate of  $1.26 \times 10^{-8}$  bp/generation. The estimate for the age of the Neandertal admixture time is then approx. 54k years.

## References

46. M. V. Anikovitch, V. V. Popov, N. I. Platonova, *\emph{Paleolit Kostënkovsko-Borshchëvskogo Raiona v Kontekste Verkhnego Paleolita Evropy* [*\emph{Paleolithic of the Kostenki-Boroshchevo Region in the Context of the Upper Paleolithic of Europe}*] (Izdatel'stvo "Nestor-Istoriia," Sankt-Peterburg, 2008).
47. J. F. Hoffecker, M. V. Anikovitch, Kostenki: Geography and Culture. *Encycl. Glob. Archaeol.*, 4319–4323 (2014).
48. V. T. Holliday, J. F. Hoffecker, P. Goldberg, Geoarchaeology of the Kostenki–Borshchevo Sites, Don River Valley, Russia. *Geoarchaeology*. **22**, 181–228 (2007).
49. A. N. Rogachev, *\emph{The Multilevel Sites of the Kostenki-Borshevo Region on the Don and the Problem of the Development of Culture in the Upper Paleolithic Epoch on the Russian Plain (in Russian).}* (Akademiya Nauk SSSR, Moscow-Leningrad, 1957), *Materials and Researches on the Archaeology of the USSR*.
50. R. G. Klein, *Man and Culture in the Late Pleistocene: A Case Study* (Chandler, San Francisco, 1969).
51. A. A. Sinitsyn, Kostenki 14 (markina gora): Data, problems, and perspectives. *Préhistoire Eur.* **9**, 273–313 (1996).
52. P. Haesaerts, F. Damblon, A. Sinitsyn, *Kostienki 14 (Voronezh, Central Russia): new data on stratigraphy and radiocarbon chronology* (BAR International Series 1240, 2004;  
[http://scholar.google.com/scholar?q=related:BL07o7M2dioJ:scholar.google.com/&hl=en&num=20&as\\_sdt=0,5](http://scholar.google.com/scholar?q=related:BL07o7M2dioJ:scholar.google.com/&hl=en&num=20&as_sdt=0,5)).
53. A. A. Velichko, V. V. Pisareva, S. N. Sedov, A. A. Sinitsyn, S. N. Timireva, paleogeography of kostenki-14 (markina gora). *Archaeol. Ethnol. Anthropol. Eurasia*. **37**, 35–50 (2009).
54. G. I. Lazukov, in *Paleolit Kostenkovsko-Borshchevskogo Raiona na Donu 1879-1979*, N. D. Praslov, A. N. Rogachev, Eds. (Nauka, Leningrad, 1982), pp. 13–37.
55. J. F. Hoffecker *et al.*, From the Bay of Naples to the River Don: the Campanian Ignimbrite eruption and the Middle to Upper Paleolithic transition in Eastern Europe. *J. Hum. Evol.* **55**, 858–870 (2008).
56. B. De Vivo *et al.*, New constraints on the pyroclastic eruptive history of the Campanian volcanic Plain (Italy). *Mineral. Petrol.* **73**, 47–65 (2001).
57. B. Giaccio, I. Hadjas, M. Peresani, F. G. Fedele, R. Isaia, in *When Neanderthals and Modern Humans Met*, N. J. Conard, Ed. (Verlag, Tübingen, 2006).

58. D. M. Pyle *et al.*, Wide dispersal and deposition of distal tephra during the Pleistocene 'Campanian Ignimbrite/Y5' eruption, Italy. *Quat. Sci. Rev.* **25**, 2713–2728 (2006).
59. A. A. Sinitsyn, N. D. Praslov, Y. S. Svezhentsev, L. D. Sulerzhitskii, in *Radiouglerodnaya Khronologiya Paleolita Vostochnoi Evropy i Severnoi Azii. Problemy i Perspektivy*, A. A. Sinitsyn, N. D. Praslov, Eds. (Russian Academy of Sciences, St Petersburg, 1997), pp. 21–66.
60. M. V. Anikovitch, The formation of Upper Paleolithic cultures and anatomically modern humans : The East European perspective. *Anthropologie.* **37**, 115–123 (1999).
61. A. A. Sinitsyn, in *Mitteilungen der Prähistorischen Kommission: Vol. 72. New aspects of the central and eastern european upper palaeolithic - methods, chronology, technology and subsistence*, C. Neugebauer-Maresch, L. R. Owen, Eds. (Österreichische Akademie der Wissenschaften, Vienna, 2010), pp. 27–48.
62. P. P. Efimenko, *Kostenki I* (Akademiya Nauk SSSR, Moscow, 1958).
63. A. N. Rogachev, A. A. Sinitsyn, in *Paleolit Kostenkovsko-Borshchevskogo Raiona na Donu 1879-1979*, N. D. Praslov, A. N. Rogachev, Eds. (Akademiya Nauk SSSR, Leningrad, 1982), pp. 145–162.
64. J. F. Hoffecker, *Desolate Landscapes: Ice-Age Settlement in Eastern Europe* (Rutgers University Press, New Brunswick, 2002;  
<http://books.google.com/books?hl=en&lr=&id=nXuqgInMOXIC&oi=fnd&pg=PR10&dq=Desolate+Landscapes+Ice+Age+settlement+in+Eastern+Europe&ots=UnqhIqMDGH&sig=s-iNIXf0ywYFPoXlm9y9DSTiZsY>).
65. J. F. Hoffecker *et al.*, Evidence for kill-butcher events of early Upper Paleolithic age at Kostenki, Russia. *J. Archaeol. Sci.* **37**, 1073–1089 (2010).
66. A. A. Sinitsyn, J. F. Hoffecker, Radiocarbon dating and chronology of the Early Upper Paleolithic at Kostenki. *Quat. Int.* **152-153**, 164–174 (2006).
67. A. A. Sinitsyn, in *Acts of the XIVth UISPP Congress (Lie`ge, 2001). General Sessions and Posters. Section 6. The Upper Paleolithic*, M. Dewez, P. Noiret, E. Teheux, Eds. (British Archaeological Reports International Series, Oxford, 2004), pp. 181–190.
68. A. A. Sinitsyn, A Palaeolithic “Pompeii” at Kostenki, Russia. *Antiquity.* **77**, 9–214 (2003).
69. A. A. Sinitsyn, in *Mitteilungen der Prähistorischen Kommission: Vol. 72. New aspects of the central and eastern european upper palaeolithic - methods, chronology, technology and subsistence*, C. Neugebauer-Maresch, L. R. Owen, Eds. (Österreichische Akademie der Wissenschaften, Vienna, 2010), pp. 27–48.

70. J. F. Hoffecker, The early upper Paleolithic of eastern Europe reconsidered. *Evol. Anthropol. Issues News Rev.* **20**, 24–39 (2011).
71. P. R. Nigst, *The Early Upper Palaeolithic of the Middle Danube Region* (Leiden University Press, Leiden, 2012; [http://books.google.co.uk/books?id=q-PhuQAACAAJ&dq=intitle:The+Early+Upper+Palaeolithic+of+the+Middle+Danube+region&hl=&cd=1&source=gbs\\_api](http://books.google.co.uk/books?id=q-PhuQAACAAJ&dq=intitle:The+Early+Upper+Palaeolithic+of+the+Middle+Danube+region&hl=&cd=1&source=gbs_api)).
72. J.-J. Hublin, The modern human colonization of western Eurasia: When and where? *Quat. Sci. Rev.* DOI:10.1016/j.quascirev.2014.08.011 (2014) (available at <http://www.sciencedirect.com/science/article/pii/S0277379114003254>).
73. S. L. Kuhn, M. C. Stiner, E. Güleç, Initial Upper Palaeolithic in south-central Turkey and its regional context: a preliminary report. *Antiquity*. **73**, 505–517 (1999).
74. G. B. Tostevin, thesis, Harvard University, Cambridge, Massachusetts (2000).
75. O. Bar-Yosef, in *When Neanderthals and modern humans met*, N. J. Conard, Ed. (Verlag, Tübingen, 2006), pp. 467–482.
76. J. F. Hoffecker, The spread of modern humans in Europe. *Proc. Natl. Acad. Sci. USA*. **106**, 16040–16045 (2009).
77. U. C. Müller *et al.*, The role of climate in the spread of modern humans into Europe. *Quat. Sci. Rev.* **30**, 273–279 (2011).
78. G. B. Tostevin, *Seeing Lithics: A Middle-Range Theory for Testing for Cultural Transmission in the Pleistocene* (Oxbow Books, Oxford, 2012).
79. G. F. Debetz, Paleoanthropological finds at Kostenki. *Sov. Ethnogr.* **1**, 43–53 (1955).
80. P. Mellars, *The Neanderthal Legacy: An Archaeological Perspective from Western Europe*. (Princeton Univ. Press, Princeton, 1996).
81. W. Davies, Palaeoanthropology: The time of the last Neanderthals. *Nature*. **512**, 260–261 (2014).
82. T. Higham *et al.*, The timing and spatiotemporal patterning of Neanderthal disappearance. *Nature*. **512**, 306–309 (2014).
83. C. Finlayson *et al.*, Late survival of Neanderthals at the southernmost extreme of Europe. *Nature*. **443**, 850–853 (2006).
84. G. B. Tostevin, in *More than meets the eye. Studies on Upper Palaeolithic Diversity in the Near East*, A. N. Goring-Morris, A. Belfer-Cohen, Eds. (Oxbow Books, Oxford, 2003), pp. 54–67.

85. D. Richter, G. TOSTEVIN, P. ŠKRDLA, Bohunician technology and thermoluminescence dating of the type locality of Brno-Bohunice (Czech Republic). *J. Hum. Evol.* **55**, 871–885 (2008).
86. C. C. Szmidt, C. Normand, G. S. Burr, G. W. L. Hodgins, S. LaMotta, AMS 14C dating the Protoaurignacian/Early Aurignacian of Isturitz, France. Implications for Neanderthal-modern human interaction and the timing of technical and cultural innovations in Europe. *J. Archaeol. Sci.* **37**, 758–768 (2010).
87. P. R. Nigst *et al.*, Early modern human settlement of Europe north of the Alps occurred 43,500 years ago in a cold steppe-type environment. *Proc. Natl. Acad. Sci. USA* (2014), doi:10.1073/pnas.1412201111.
88. A. E. Marks, *Prehistory and Paleoenvironments in the Central Negev, Israel*. (Southern Methodist University Press, Dallas, 1983).
89. T. Goebel, A. P. Derevianko, V. T. Petrin, Dating the middle-to-upper-paleolithic transition at Kara-Bom. *Curr. Anthropol.* **34**, 452–458 (1993).
90. N. Zwyns, *Laminar technology and the onset of the Upper Paleolithic in the Altai, Siberia* (Leiden University Press, Leiden, 2012).
91. T. Goebel, M. Aksenov, Accelerator radiocarbon dating of the initial Upper Paleolithic in southeast Siberia. *Antiquity*. **69**, 349–357 (1995).
92. S. L. Kuhn, N. Zwyns, Rethinking the initial Upper Paleolithic. *Quat. Int.* **347**, 29–38 (2014).
93. T. Goebel, Anthropology. The missing years for modern humans. *Science*. **315**, 194–196 (2007).
94. N. R. Rebollo *et al.*, New radiocarbon dating of the transition from the Middle to the Upper Paleolithic in Kebara Cave, Israel. *J. Archaeol. Sci.* **38**, 2424–2433 (2011).
95. N. Sirakov *et al.*, Un nouveau faciès lamellaire du début du Paléolithique supérieur dans les Balkans. *Paléorient*, 131–144 (2007).
96. F. Bon, L’Aurignacien entre mer et Océan. Réflexion sur l’unité des phases anciennes de l’Aurignacien dans le sud de la France. *Mém. Société Préhistorique Fr.* **10**, 253 (2002).
97. J.-L. Guadelli *et al.*, in *Les premiers peuplements en Europe. Actes du Colloque international : Données récentes sur les modalités de peuplement et sur le cadre chronostratigraphique, géologique et paléogéographique des industries du Paléolithique ancien et moyen en Europe*, N. Molines, M. H. Moncel, J. L. Monnier, Eds. (Universite de Rennes, Rennes, 2005; <http://halshs.archives-ouvertes.fr/halshs-00136044>), pp. 87–103.



98. K. Douka, C. A. Bergman, R. E. M. Hedges, F. B. Wesselingh, T. F. G. Higham, Chronology of Ksar Akil (Lebanon) and implications for the colonization of Europe by anatomically modern humans. *PLoS One*. **8**, e72931 (2013).
99. M. Otte *et al.*, The Aurignacian in the Zagros region: new research at Yafteh cave, Lorestan, Iran. *Antiquity*. **81**, 82–96 (2007).
100. T. Tsanova *et al.*, Le plus petit dénominateur commun: réflexion sur la variabilité des ensembles lamellaires du Paléolithique supérieur ancien d'Eurasie. Un bilan autour des exemples de Kozarnika (Est des Balkans) et Yafteh (Zagros central). *L'Anthropologie*. **116**, 469–509 (2012).
101. M. Vanhaeren, F. d'Errico, Aurignacian ethno-linguistic geography of Europe revealed by personal ornaments. *J. Archaeol. Sci.* **33**, 1105–1128 (2006).
102. V. Borgia, F. Ranaldo, A. Ronchitelli, U. Wierer, in *À la recherche des identités gravettiennes : actualités, questionnements et perspectives : actes de la table ronde sur le Gravettien en France et dans les pays limitrophes, Aix-en-Provence, 6-8 octobre 2008*, N. Goutas, L. Klaric, D. Pesesse, P. Guillermin, Eds. (Société préhistorique française, Paris, 2011), *Mémoires de la Société préhistorique française* ; 52, pp. 161–174.
103. D. Henry-Gambier, D. Sacchi, La Crouzade V-VI (Aude, France) : un des plus anciens fossiles d'anatomie moderne en Europe occidentale. *Bull. Mém. Société Anthropol. Paris*. **20**, 79–104 (2008).
104. W. Davies, R. E. M. Hedges, Dating a type site: fitting Szeleta cave into its regional chronometric context. *Praehistorische Zeitschrift*. **9-10**, 35–45 (2008).
105. F. V. Ramírez Rozzi *et al.*, Cutmarked human remains bearing Neandertal features and modern human remains associated with the Aurignacian at Les Rois. *J. Anthropol. Sci. Riv. Antropol. JASS Ist. Ital. Antropol.* **87**, 153–185 (2009).
106. E. Alexandrescu, A. Olariu, G. Skog, K. Stenstrom, R. Hellborg, Human fossil bones from the Muierii Cave and the Cioclovina Cave, Romania. *Anthropologie*. **114**, 341–353 (2010).
107. T. Goebel, in *Emergence and Diversity of Modern Human Behavior in Paleolithic Asia*, Y. Kaifu, M. Izuhara, T. Goebel, H. Sato, A. Ono, Eds. (Texas A&M University Press, College Station, 2014), pp. 437–452.
108. F. Li, S. L. Kuhn, X. Gao, F. Chen, Re-examination of the dates of large blade technology in China: A comparison of Shuidonggou Locality 1 and Locality 2. *J. Hum. Evol.* **64**, 161–168 (2013).
109. F. Li *et al.*, The development of Upper Palaeolithic China: new results from the Shuidonggou site. *Antiquity*. **87**, 368–383 (2013).

110. S. Hughes *et al.*, Molecular phylogeny of the extinct giant deer, *Megaloceros giganteus*. *Mol. Phylogenet. Evol.* **40**, 285–291 (2006).
111. S. A. Gladyshev, J. W. Olsen, A. V. Tabarev, Y. V. Kuzmin, Chronology and periodization of Upper Paleolithic sites in Mongolia. *Archaeol. Ethnol. Anthropol. Eurasia.* **3**, 33–40 (2010).
112. C. Morgan *et al.*, Redating Shuidonggou Locality 1 and Implications for the Initial Upper Paleolithic in East Asia. *Radiocarbon.* **56**, 165–179 (2014).
113. F. T. Goebel, The Middle to Upper Paleolithic Transition in Siberia. *Anthropol. Pap. Univ. Alsk.* **26**, 94–113 (2003).
114. P. J. Brantingham, S. L. Kuhn, K. W. Kerry, *The Early Upper Paleolithic beyond Western Europe* (University of California Press, Los Angeles, 2004).
115. O. Bar-Yosef, Y. Wang, Paleolithic Archeology in China. *Annu. Rev. Anthropol.* **41**, 319–335 (2012).
116. I. Buvit, K. Terry, M. Izuho, in *Emergence and Diversity of Modern Human Behavior in Paleolithic Asia*, Y. Kaifu, M. Izuho, T. Goebel, H. Sato, A. Ono, Eds. (Texas A&M University Press, College Station, 2014), pp. 490–505.
117. K. Terry, thesis, Washington State University (2010).
118. Y. Kaifu, *Emergence and Diversity of Modern Human Behavior in Paleolithic Asia* (Texas A&M University Press, 2014; <http://books.google.dk/books?id=88-6oAEACAAJ>).
119. Y. V. Kuzmin, P. A. Kosintsev, D. I. Razhev, G. W. L. Hodgins, The oldest directly-dated human remains in Siberia: AMS 14C age of talus bone from the Baigara locality, West Siberian Plain. *J. Hum. Evol.* **57**, 91–95 (2009).
120. A. Gibbons, Oldest Homo sapiens genome pinpoints neandertal input. *Science.* **343**, 1417 (2014).
121. N. Zwyns, D. Flas, in *Les Aurignaciens*, M. Otte, Ed. (Editions Errance, Paris, 2010), pp. 271–295.
122. W. Davies, P. J. Gollop, in *Neanderthals and Modern Humans in the European Landscape during the Last Glaciation*, T. H. van Andel, W. Davies, Eds. (McDonald Institute for Archaeological Research, Cambridge, 2003), pp. 131–146.
123. K. E. Graf, “The Good, the Bad, and the Ugly”: evaluating the radiocarbon chronology of the middle and late Upper Paleolithic in the Enisei River valley, south-central Siberia. *J. Archaeol. Sci.* **37**, 210–223 (2009).

124. K. E. Graf, Hunter–gatherer dispersals in the mammoth-steppe: technological provisioning and land-use in the Enisei River valley, south-central Siberia. *J. Archaeol. Sci.* **37**, 210–223 (2010).
125. C. G. Turner, Teeth and prehistory in Asia. *Science*. **260**, 88–96 (1989).
126. M. Mussi, J. Cinq-Mars, P. Bolduc, Echoes from the mammoth steppe: the case of the Balzi Rossi. *Univ. Leiden*, 106–124 (2000).
127. M. Raghavan *et al.*, Upper Palaeolithic Siberian genome reveals dual ancestry of Native Americans. *Nature*. **505**, 87–91 (2014).
128. R. A. Housley, C. S. Gamble, M. Street, P. Pettitt, Radiocarbon evidence for the Lateglacial Human Recolonisation of Northern Europe. *Proc. Prehist. Soc.* **63**, 25–54 (1997).
129. C. Gamble, W. Davies, P. Pettitt, M. Richards, Climate change and evolving human diversity in Europe during the last glacial. *Philos. Trans. R. Soc. Lond. B. Biol. Sci.* **359**, 243–254 (2004).
130. M. Mirazon Lahr, R. A. Foley, R. Pinhasi, in *Archaeogenetics: DNA and the population prehistory of Europe*, C. Renfrew, K. Boyle, Eds. (McDonald Institute for Archaeological Research, Cambridge, 2000), pp. 81–88.
131. J. Krause *et al.*, Mitochondrial genomes reveal an explosive radiation of extinct and extant bears near the Miocene-Pliocene boundary. *BMC Evol. Biol.* **8**, 220 (2008).
132. L. Orlando *et al.*, Recalibrating Equus evolution using the genome sequence of an early Middle Pleistocene horse. *Nature*. **499**, 74–78 (2013).
133. J. Dabney *et al.*, Complete mitochondrial genome sequence of a Middle Pleistocene cave bear reconstructed from ultrashort DNA fragments. *Proc. Natl. Acad. Sci.*, 201314445 (2013).
134. B. Llamas *et al.*, High-resolution analysis of cytosine methylation in ancient DNA. *PLoS ONE*. **7**, e30226 (2012).
135. O. Smith *et al.*, Genomic methylation patterns in archaeological barley show demethylation as a time-dependent diagenetic process. *Sci. Rep.* **4** (2014), doi:10.1038/srep05559.
136. D. Gokhman *et al.*, Reconstructing the DNA Methylation Maps of the Neandertal and the Denisovan. *Science*. **344**, 523–527 (2014).
137. A. W. Briggs *et al.*, Removal of deaminated cytosines and detection of in vivo methylation in ancient DNA. *Nucleic Acids Res.*, gkp1163 (2009).

138. A. Seguin-Orlando *et al.*, Ligation bias in illumina next-generation DNA libraries: implications for sequencing ancient genomes. *PloS One*. **8**, e78575 (2013).
139. M. Meyer, M. Kircher, Illumina sequencing library preparation for highly multiplexed target capture and sequencing. *Cold Spring Harb. Protoc.* **2010**, pdb.prot5448 (2010).
140. J. T. Vilstrup *et al.*, Mitochondrial Phylogenomics of Modern and Ancient Equids. *PLoS ONE*. **8**, e55950 (2013).
141. M. Schubert *et al.*, Characterization of ancient and modern genomes by SNP detection and phylogenomic and metagenomic analysis using PALEOMIX. *Nat. Protoc.* **9**, 1056–1082 (2014).
142. M. Schubert *et al.*, Improving ancient DNA read mapping against modern reference genomes. *BMC Genomics*. **13**, 178 (2012).
143. S. Lindgreen, AdapterRemoval: easy cleaning of next-generation sequencing reads. *BMC Res. Notes*. **5**, 337 (2012).
144. H. Li, R. Durbin, Fast and accurate short read alignment with Burrows-Wheeler transform. *Bioinformatics*. **25**, 1754–1760 (2009).
145. A. McKenna *et al.*, The Genome Analysis Toolkit: A MapReduce framework for analyzing next-generation DNA sequencing data. *Genome Res*. **20**, 1297–1303 (2010).
146. H. Jónsson, A. Ginolhac, M. Schubert, P. L. F. Johnson, L. Orlando, mapDamage2.0: fast approximate Bayesian estimates of ancient DNA damage parameters. *Bioinforma. Oxf. Engl.* **29**, 1682–1684 (2013).
147. H. Li *et al.*, The Sequence Alignment/Map format and SAMtools. *Bioinformatics*. **25**, 2078–2079 (2009).
148. Q. Fu *et al.*, A Revised Timescale for Human Evolution Based on Ancient Mitochondrial Genomes. *Curr. Biol.* **23**, 553–559 (2013).
149. D. Reich *et al.*, Genetic history of an archaic hominin group from Denisova Cave in Siberia. *Nature*. **468**, 1053–1060 (2010).
150. M. Rasmussen *et al.*, An Aboriginal Australian Genome Reveals Separate Human Dispersals into Asia. *Science*. **334**, 94–98 (2011).
151. K. A. Frazer *et al.*, A second generation human haplotype map of over 3.1 million SNPs. *Nature*. **449**, 851–861 (2007).
152. P. Francalacci *et al.*, Low-Pass DNA Sequencing of 1200 Sardinians Reconstructs European Y-Chromosome Phylogeny. *Science*. **341**, 565–569 (2013).

153. G. D. Poznik *et al.*, Sequencing Y Chromosomes Resolves Discrepancy in Time to Common Ancestor of Males Versus Females. *Science*. **341**, 562–565 (2013).
154. International Society of Genetic Genealogy. *Int. Soc. Genet. Geneal.* (2014), (available at <http://www.isogg.org> Y-DNA Haplogroup Tree 2014, Version: 9.71).
155. J. Z. Li *et al.*, Worldwide Human Relationships Inferred from Genome-Wide Patterns of Variation. *Science*. **319**, 1100–1104 (2008).
156. J. Di Cristofaro *et al.*, Afghan Hindu Kush: Where Eurasian Sub-Continent Gene Flows Converge. *PLoS ONE*. **8**, e76748 (2013).
157. S. A. Fedorova *et al.*, Autosomal and uniparental portraits of the native populations of Sakha (Yakutia): implications for the peopling of Northeast Eurasia. *BMC Evol. Biol.* **13**, 127 (2013).
158. B. Yunusbayev *et al.*, The Caucasus as an asymmetric semipermeable barrier to ancient human migrations. *Mol. Biol. Evol.*, msr221 (2011).
159. G. Chaubey *et al.*, Population Genetic Structure in Indian Austroasiatic speakers: The Role of Landscape Barriers and Sex-specific Admixture. *Mol. Biol. Evol.*, msq288 (2010).
160. M. Rasmussen *et al.*, Ancient human genome sequence of an extinct Palaeo-Eskimo. *Nature*. **463**, 757–762 (2010).
161. M. Metspalu *et al.*, Shared and unique components of human population structure and genome-wide signals of positive selection in South Asia. *Am. J. Hum. Genet.* **89**, 731–744 (2011).
162. D. M. Behar *et al.*, The genome-wide structure of the Jewish people. *Nature*. **466**, 238–242 (2010).
163. I. Lazaridis *et al.*, Ancient human genomes suggest three ancestral populations for present-day Europeans. *Nature*. **513**, 409–413 (2014).
164. P. Skoglund *et al.*, Genomic diversity and admixture differs for Stone-Age Scandinavian foragers and farmers. *Science*. **344**, 747–750 (2014).
165. A. Keller *et al.*, New insights into the Tyrolean Iceman’s origin and phenotype as inferred by whole-genome sequencing. *Nat. Commun.* **3**, 698 (2012).
166. P. Skoglund *et al.*, Separating endogenous ancient DNA from modern day contamination in a Siberian Neandertal. *Proc. Natl. Acad. Sci.* **111**, 2229–2234 (2014).
167. S. Sankararaman *et al.*, The genomic landscape of Neanderthal ancestry in present-day humans. *Nature*. **507**, 354–357 (2014).

168. B. Vernot, J. M. Akey, Resurrecting Surviving Neandertal Lineages from Modern Human Genomes. *Science*. **343**, 1017–1021 (2014).
169. D. H. Alexander, J. Novembre, K. Lange, Fast model-based estimation of ancestry in unrelated individuals. *Genome Res.* (2009), doi:10.1101/gr.094052.109.
170. M. Sikora *et al.*, Population Genomic Analysis of Ancient and Modern Genomes Yields New Insights into the Genetic Ancestry of the Tyrolean Iceman and the Genetic Structure of Europe. *PLoS Genet.* **10**, e1004353 (2014).
171. J. K. Pickrell, J. K. Pritchard, Inference of Population Splits and Mixtures from Genome-Wide Allele Frequency Data. *PLoS Genet.* **8**, e1002967 (2012).
172. J. C. Dohm, C. Lottaz, T. Borodina, H. Himmelbauer, Substantial biases in ultra-short read data sets from high-throughput DNA sequencing. *Nucleic Acids Res.* **36**, e105 (2008).
173. K. Nakamura *et al.*, Sequence-specific error profile of Illumina sequencers. *Nucleic Acids Res.*, gkr344 (2011).
174. R. R. Hudson, Generating samples under a Wright–Fisher neutral model of genetic variation. *Bioinformatics*. **18**, 337–338 (2002).
175. J. D. Wall *et al.*, Estimating genotype error rates from high-coverage next-generation sequence data. *Genome Res.*, gr.168393.113 (2014).
176. A. L. Price *et al.*, Sensitive Detection of Chromosomal Segments of Distinct Ancestry in Admixed Populations. *PLoS Genet.* **5**, e1000519 (2009).
177. S. Sankararaman, G. Kimmel, E. Halperin, M. I. Jordan, On the inference of ancestries in admixed populations. *Genome Res.* **18**, 668–675 (2008).
178. T. 1000 G. P. Consortium, An integrated map of genetic variation from 1,092 human genomes. *Nature*. **491**, 56–65 (2012).
179. S. Gravel, Population Genetics Models of Local Ancestry. *Genetics*, genetics.112.139808 (2012).
180. R. H. Byrd, P. Lu, J. Nocedal, C. Zhu, A Limited-Memory Algorithm for Bound Constrained Optimization. *SIAM J. Sci. Comput.* **16**, 1190–1208 (1994).
181. M. Liang, R. Nielsen, The Lengths of Admixture Tracts. *Genetics*. **197**, 953–967 (2014).
182. M. Sikora *et al.*, Population Genomic Analysis of Ancient and Modern Genomes Yields New Insights into the Genetic Ancestry of the Tyrolean Iceman and the Genetic Structure of Europe. *PLoS Genet.* **10**, e1004353 (2014).

183. M. Raghavan *et al.*, The genetic prehistory of the New World Arctic. *Science*. **345**, 1255832 (2014).

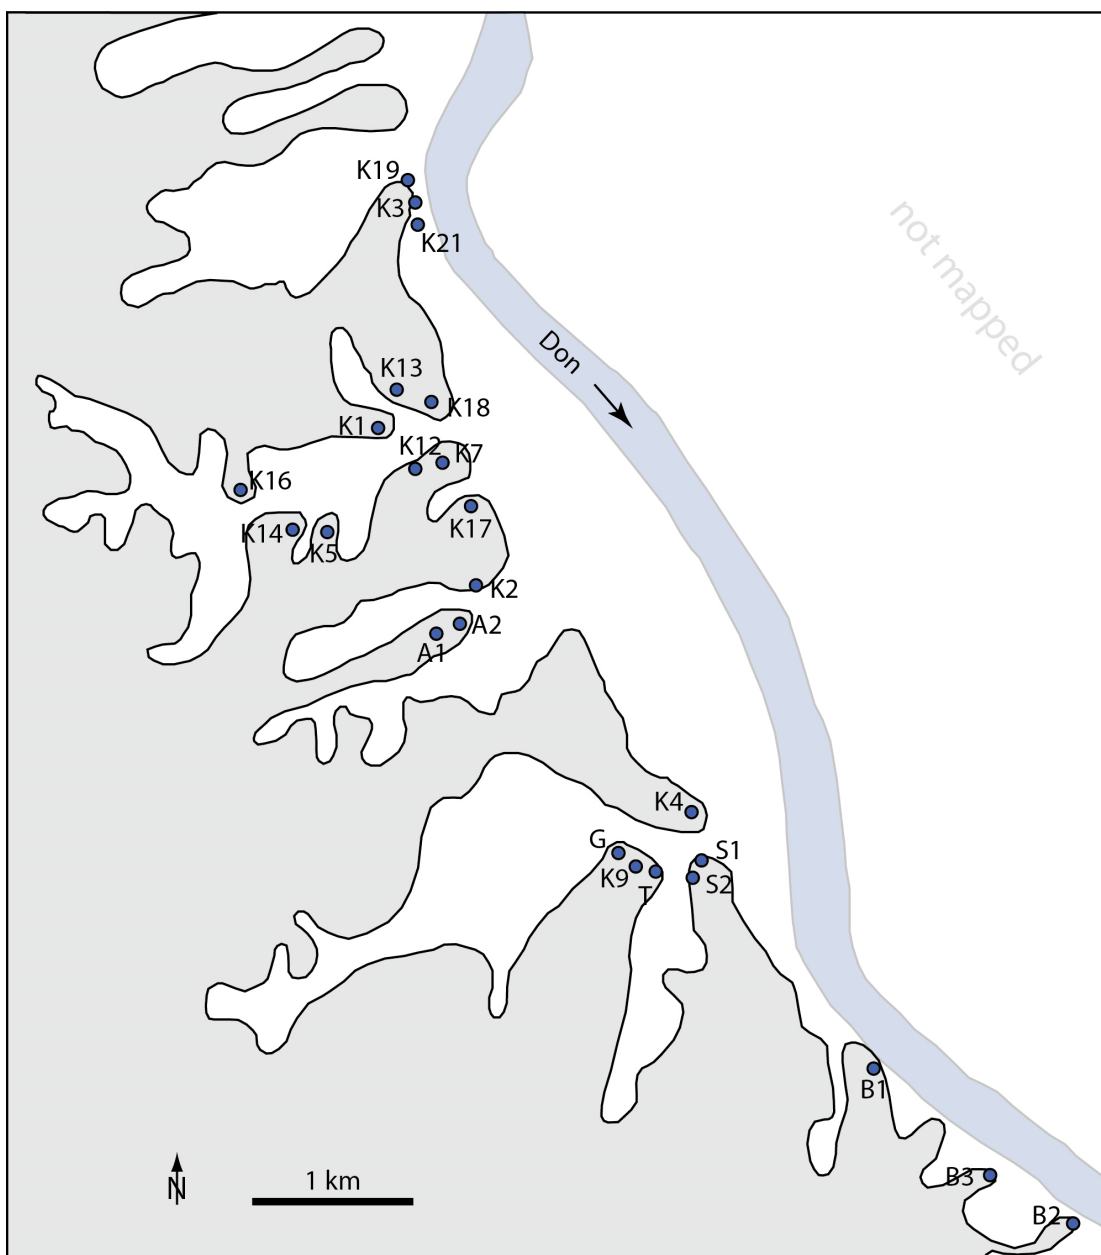

**Fig. S1**

Distribution of the archaeological sites that form the localities of Kostenki-Borshchevo the west bank of the river Don. Abbreviations: K: Kostenki, A: Anosovka, G: Gorodtsovskaya, S: Streletskaya, B: Borshchevo, T: Tel'manskaya. Redrawn after Klein (1969).



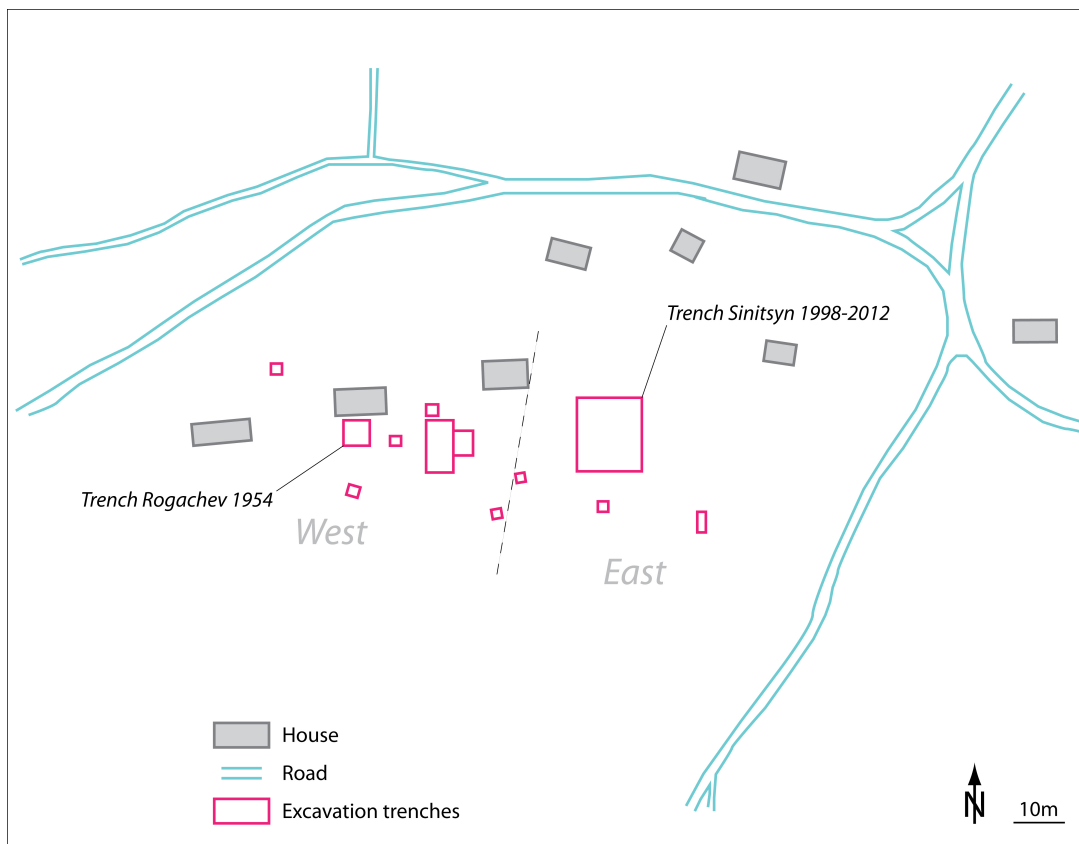

**Fig. S2**

Location of excavation trenches at Kostenki 14. The trenches on the western section of the site, which include that excavated by Rogachev in 1954 and where the skeleton was found, preserve a single horizon of Cultural Layer IV below the CI Y5 tephra, divided into two (IVa and IVb) in the eastern portion of the site.

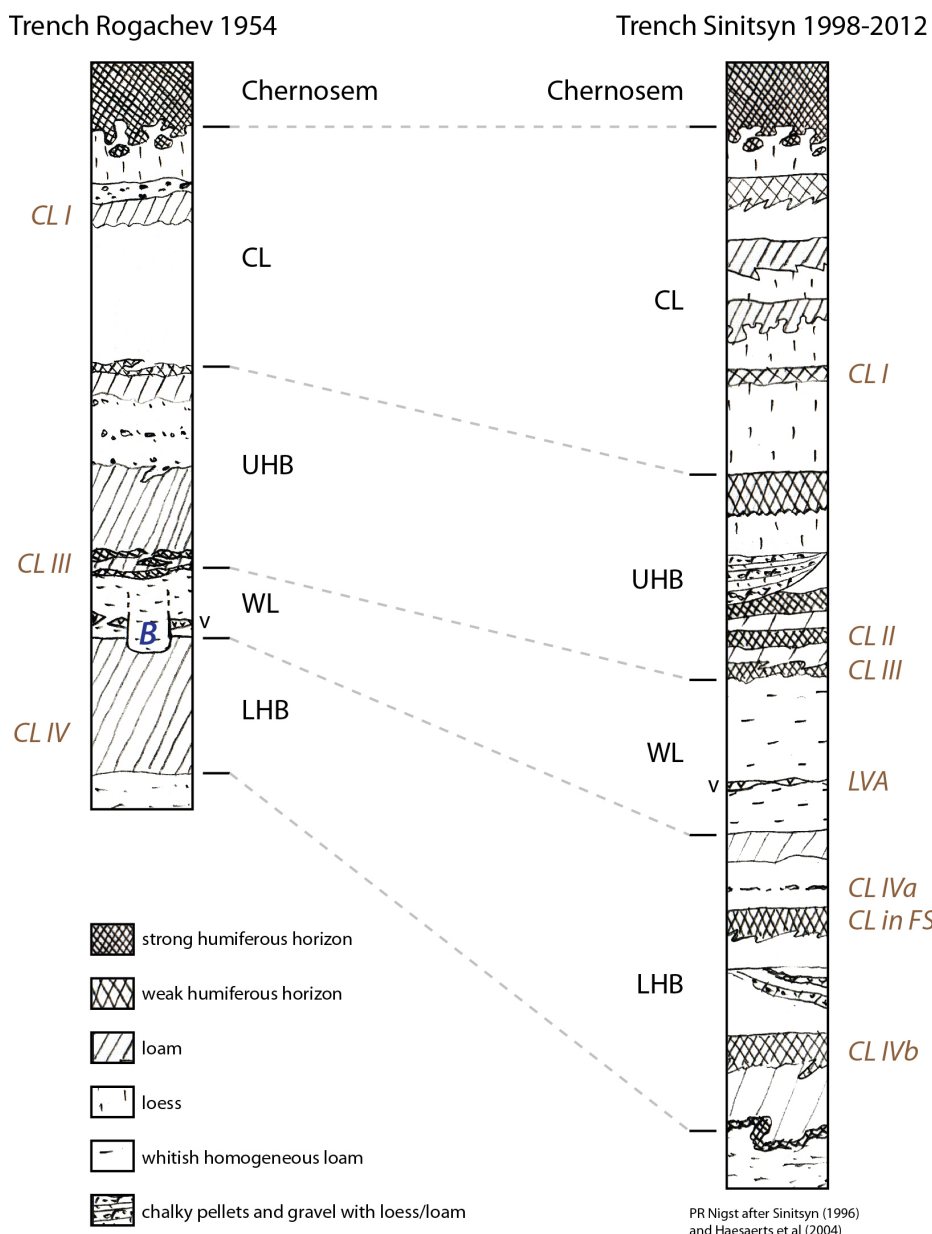

**Fig. S3**

Stratigraphic schema of Kostenki 14, showing Rogachev's 1954 section, where the human skeleton in the burial (B) was found, and the more recent section excavated by Sinitsyn 1998-2012 on the eastern part of the site and from where the detailed description of the cultural layers derives. Abbreviations: CL: Cover Loam, UHB: Upper Humic Bed, WL: Whitish Loam, LHB: Lower Humic Bed, v: volcanic ash. Cultural Layers (CL) are shown in brown and italic font. Stratigraphic logs not to scale. Figure: PR Nigst, compiled after Sinitsyn (1996) and Haesaerts et al. (2004).

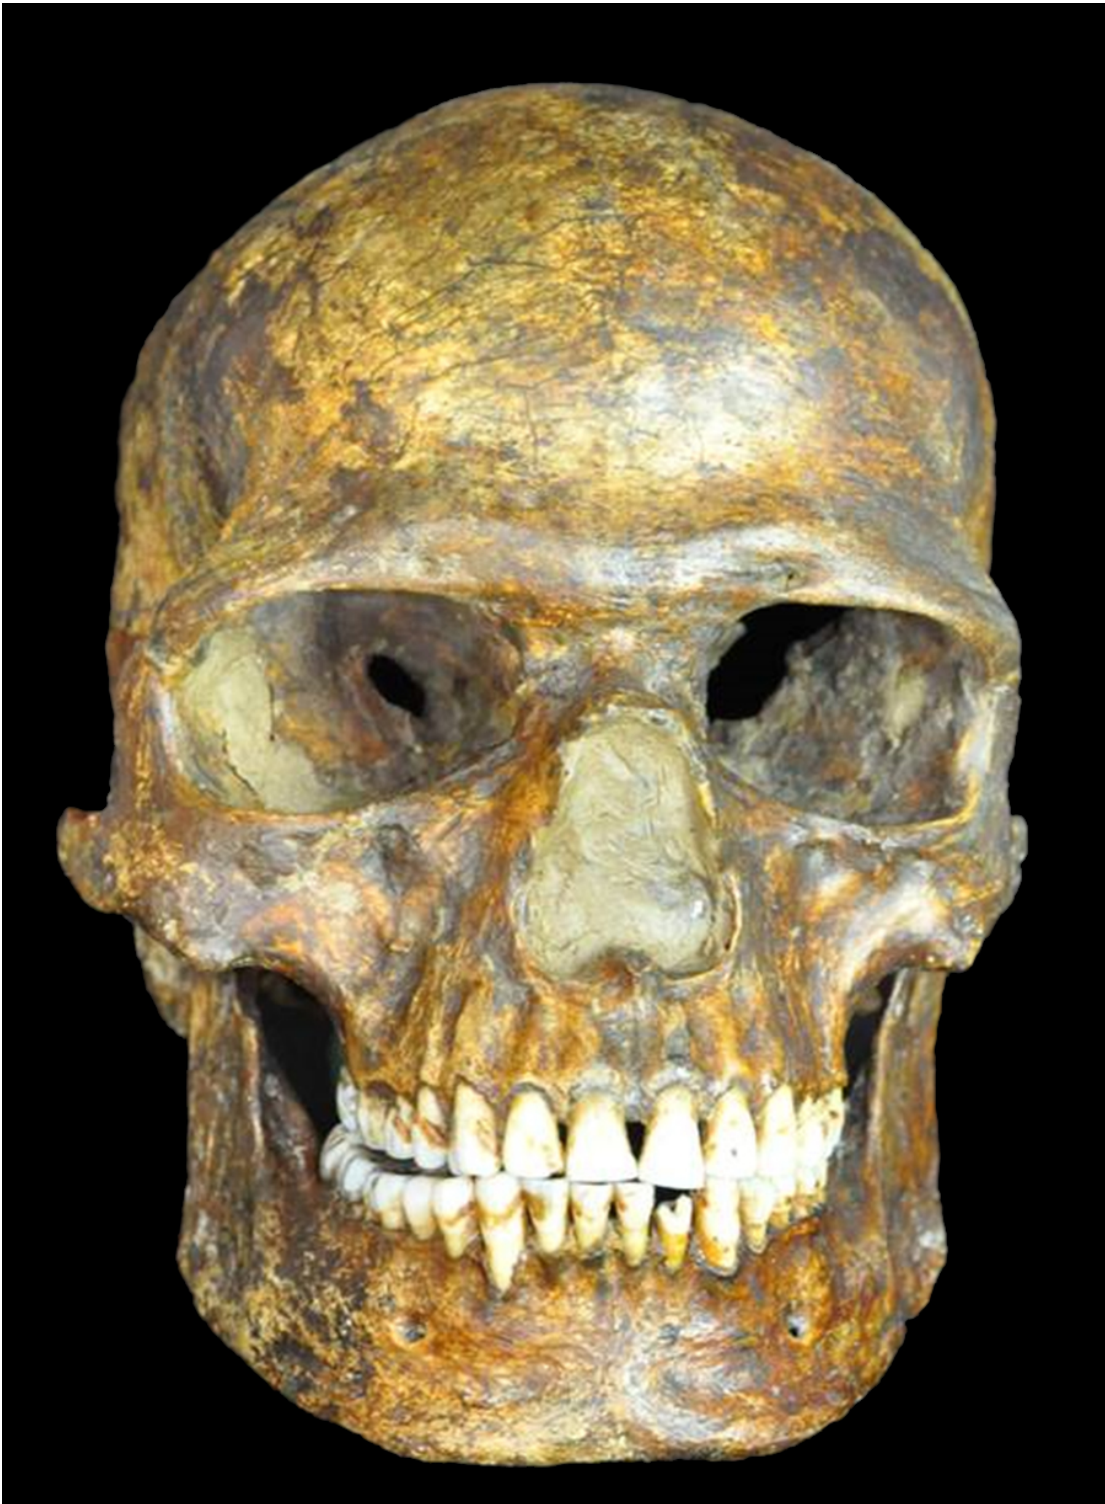

**Fig. S4**

Frontal view of the cranium of Kostenki 14. Courtesy of Vyacheslav Moiseyev, and Ethnography (Kunstkamera) Peter the Great Museum of Anthropology.

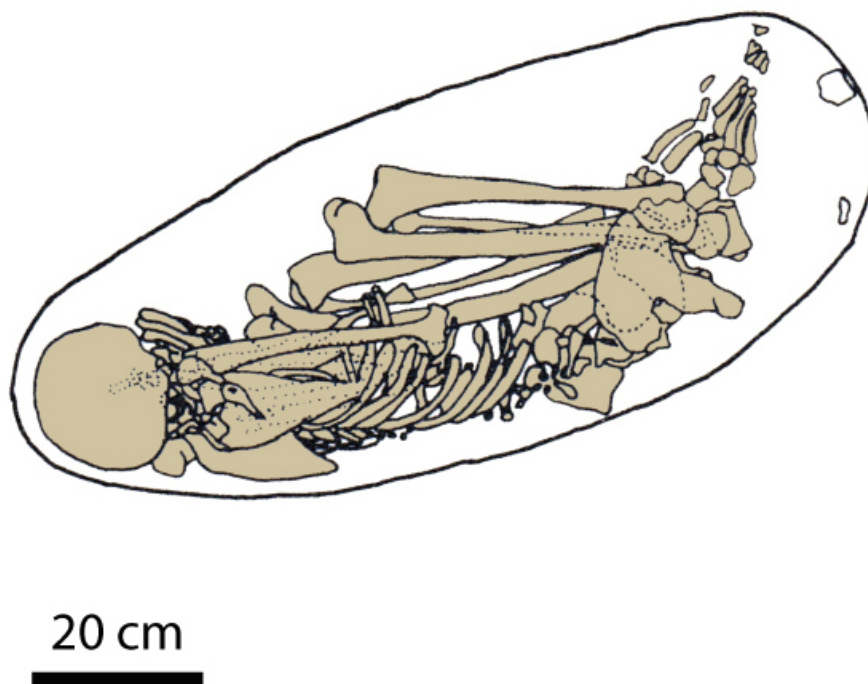

Fig. S5  
Plan of the burial from Kostenki 14 (Markina Gora); redrawn and changed after Klein (1969, Fig. 23).

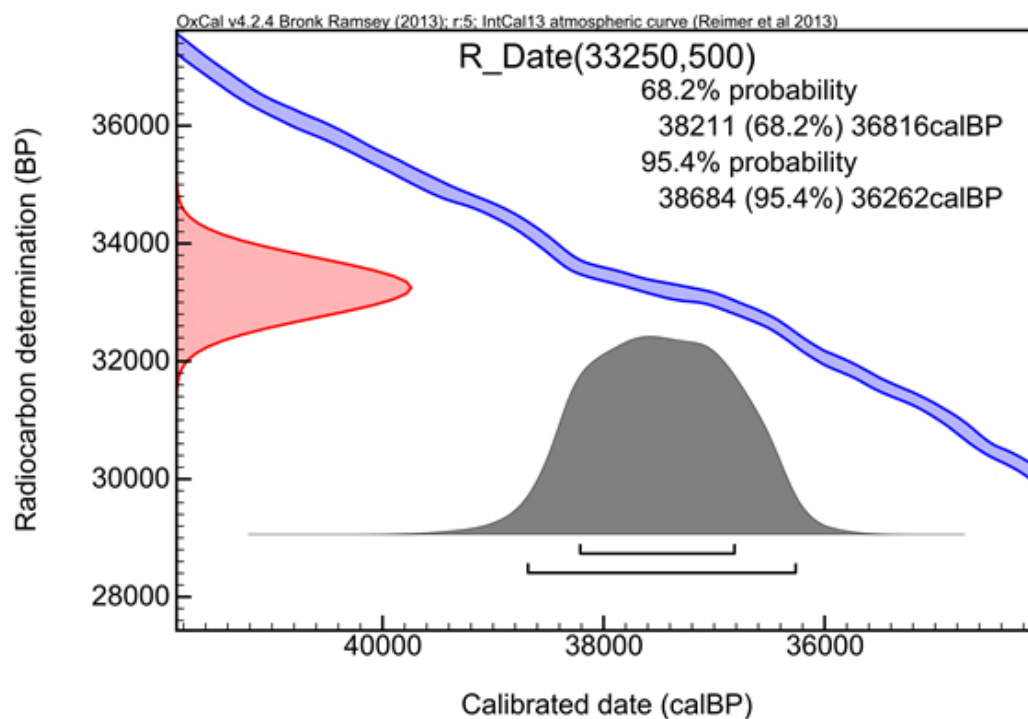

**Fig. S6**

Calibration graph of the radiocarbon date for Kostenki 14 published by Marom et al. 2006. Calibration curve: IntCal13 (Reimer et al 2013); software: OxCal 4.2.4 (Bronk Ramsey 2009).

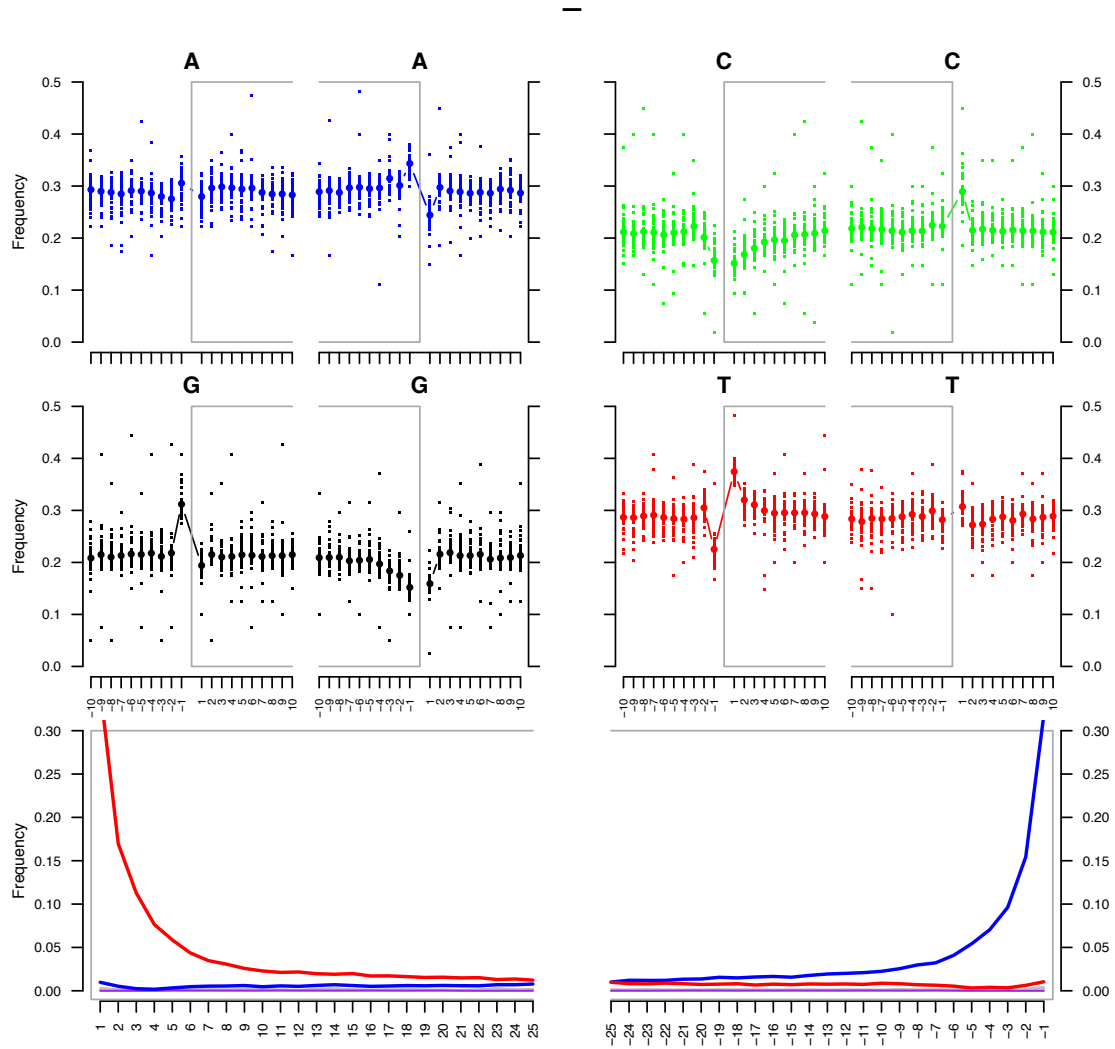

**Fig. S7**

An example of DNA fragmentation and mis-incorporation patterns observed on non-USER treated libraries. The sequence data corresponds to library ID K14\_TGAACA (see Table S2 for further details).

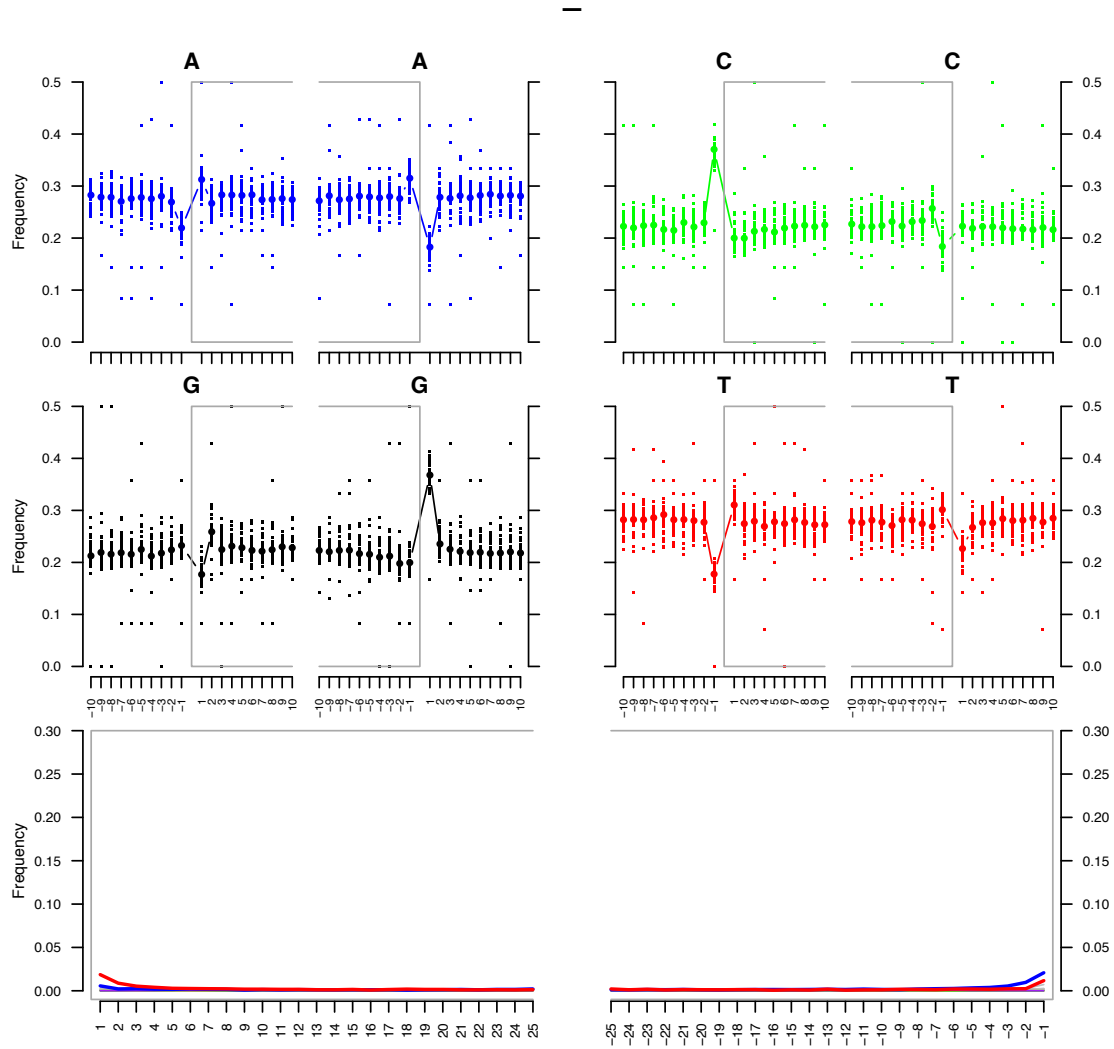

**Fig. S8**

An example of DNA fragmentation and mis-incorporation patterns observed on USER-treated libraries. The sequence data corresponds to library ID K14\_14c\_CGTAGT\_USER (see table S2 for further details).

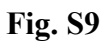

52



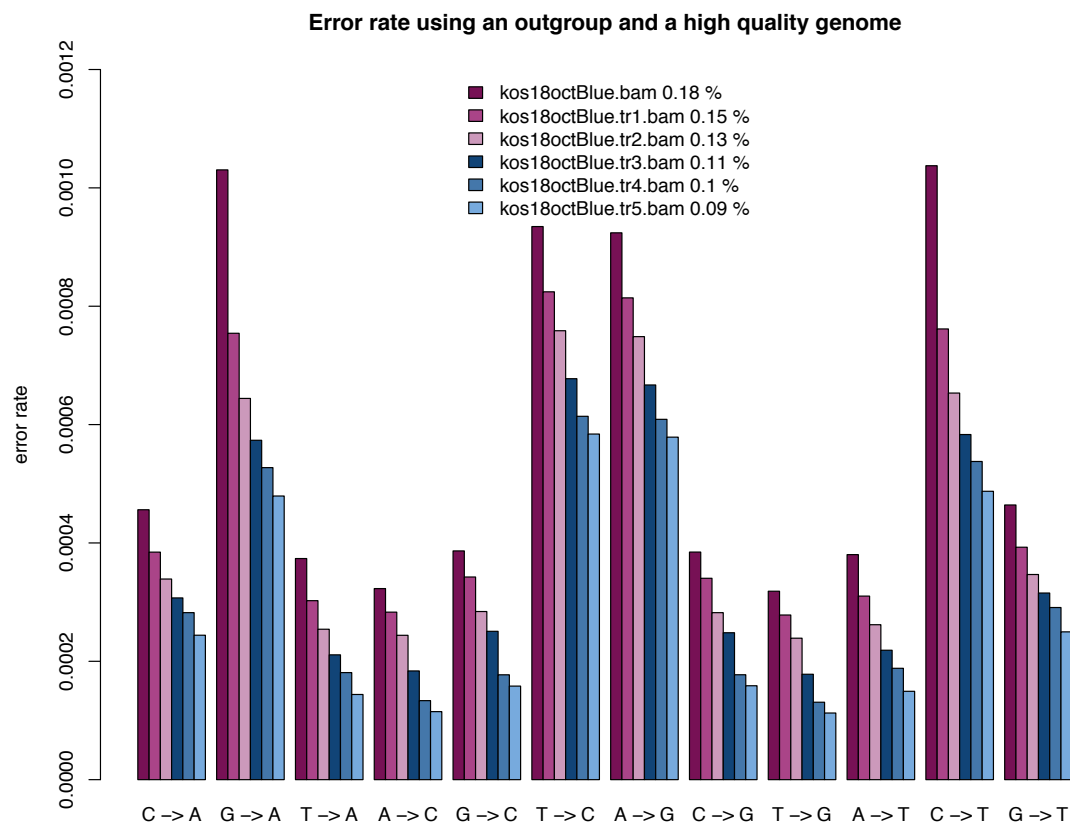

**Fig. S10**

Type specific error rates for different trimmings for all USER libraries. The overall error rates are shown in the legend.

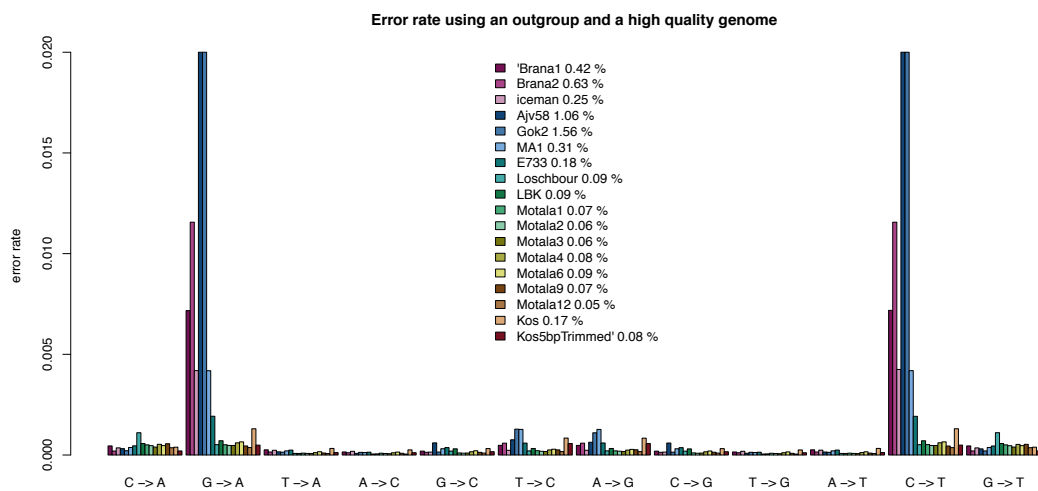

**Fig. S11**

Type specific error rates for all USER libraries. The type specific error rates for all libraries are seen in Fig. S6.

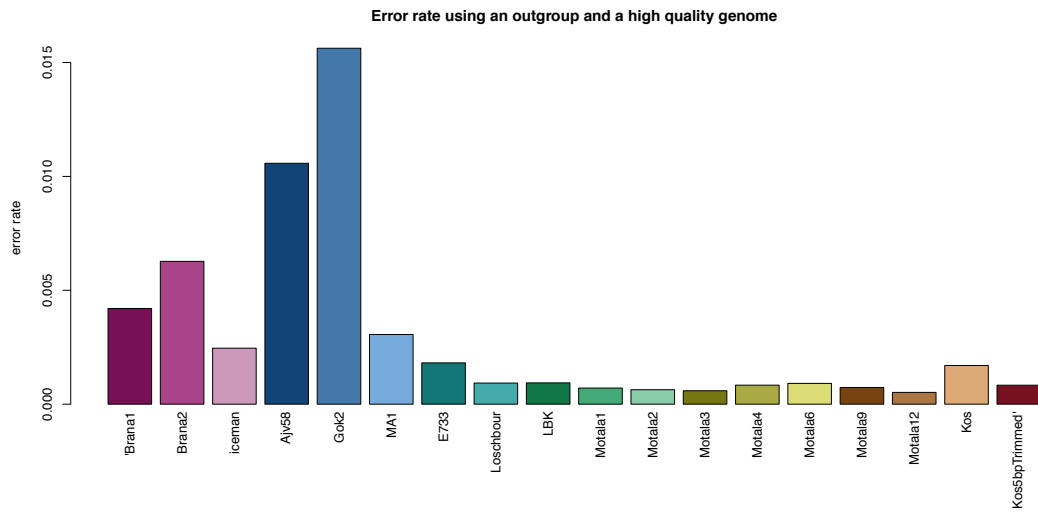

**Fig. S12**

Overall error rates for all ancient samples. We have included the untrimmed Kostenki K14 sample for comparison.

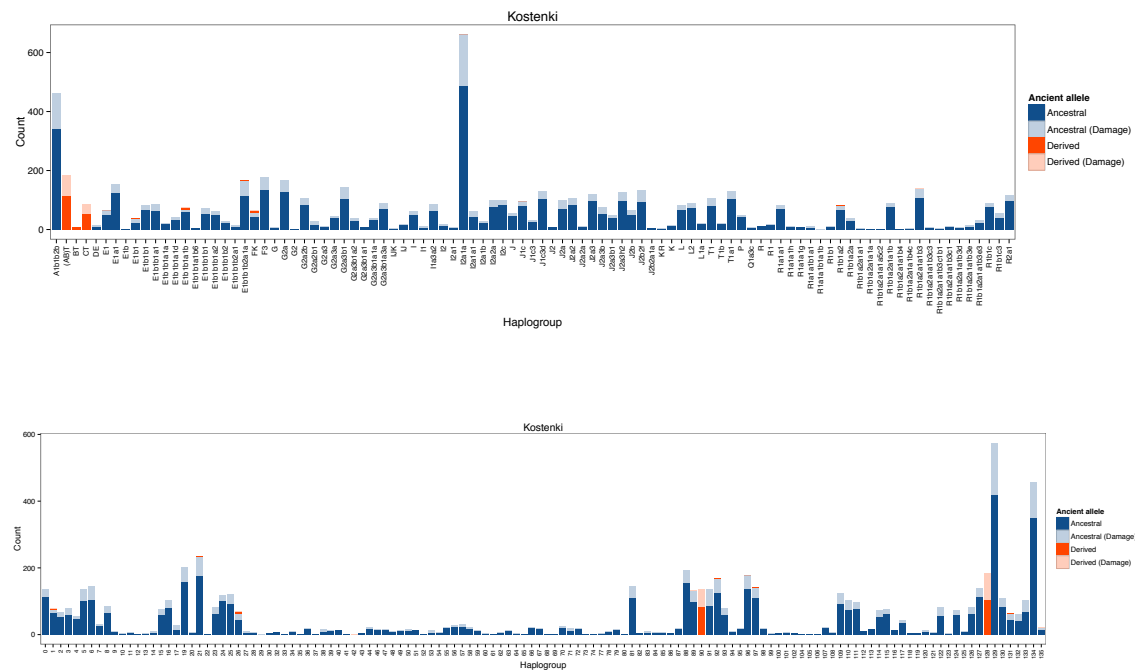

**Fig. S13**

Barplot of phylogenetically informative SNPs. The bars indicate the number of ancestral and derived mutations observed in K14 for each branch of the tree from (A) Table S1 in (152), and (B) (153) ([http://www.popgen.dk/kostenki/figs\\_online/Poznik\\_tree.pdf](http://www.popgen.dk/kostenki/figs_online/Poznik_tree.pdf)).

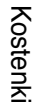

$f_3$  outgroup plot for the K14 sample, compared to all modern and ancient populations.

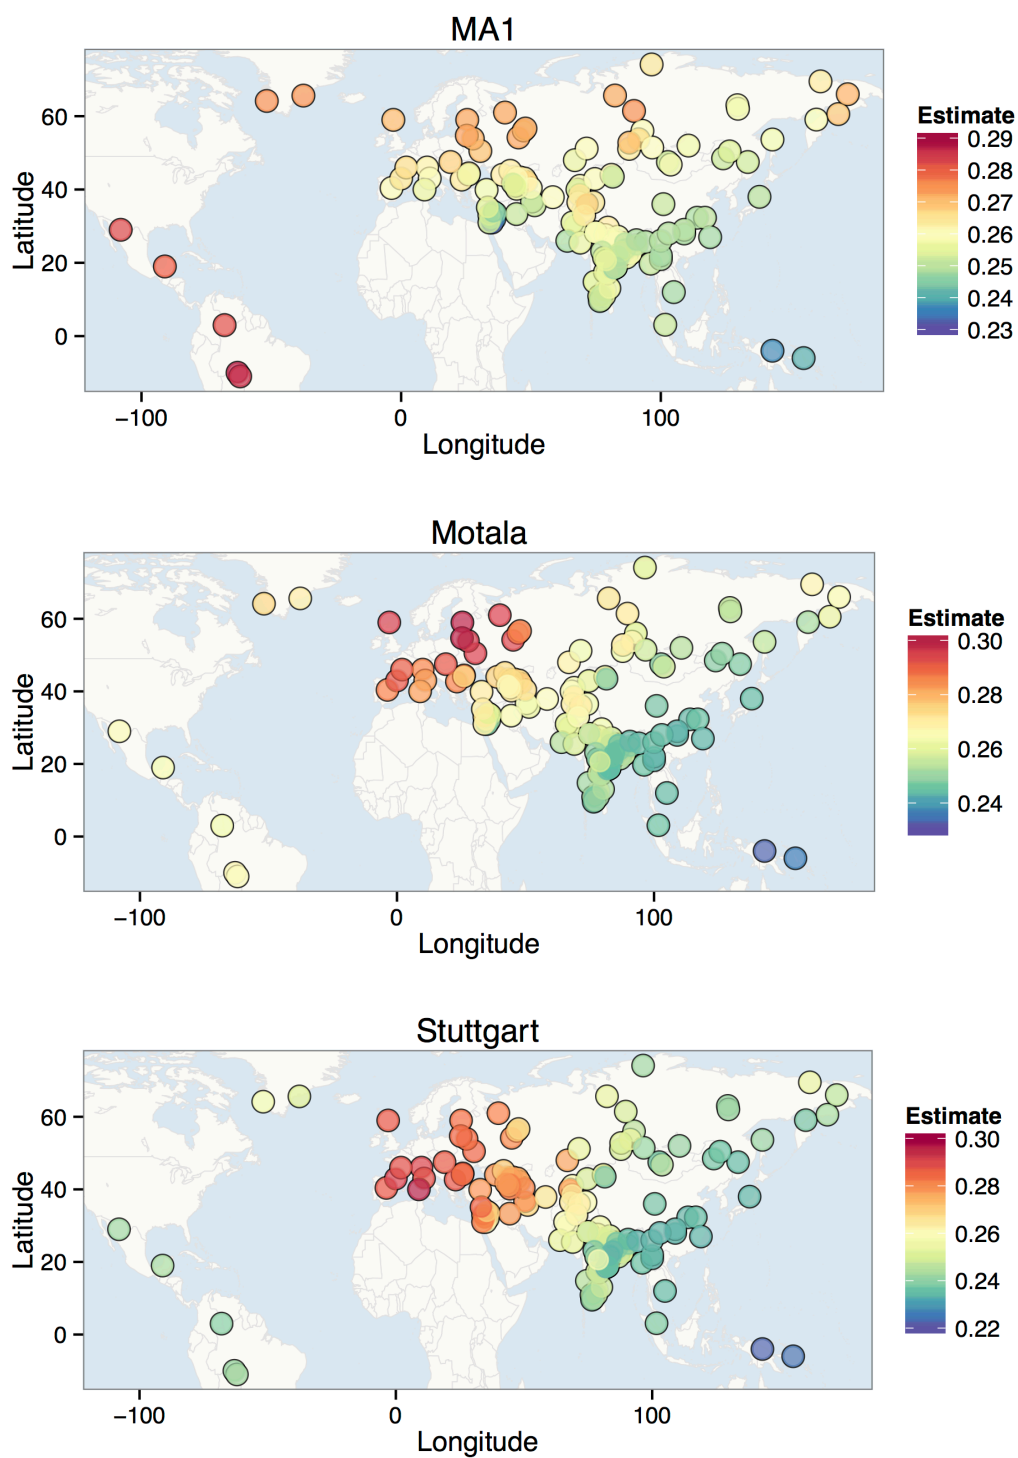

**Fig. S15**

$f_3$  outgroup maps of the form  $f_3(\text{Mbuti}; \text{Ancient}, \text{Modern})$  for MA1, Motala, and Stuttgart genomes, compared to non-African modern populations.

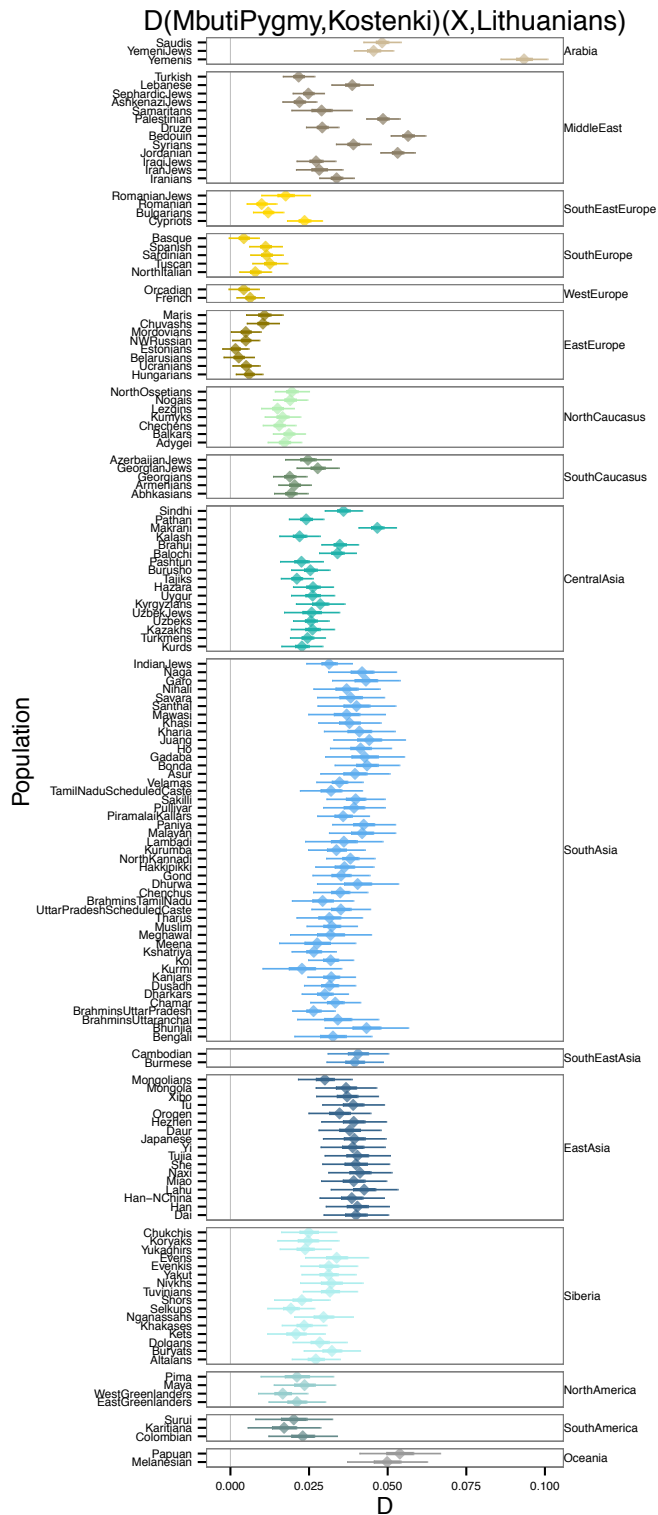

**Fig. S16**

$D$ -statistics  $D(\text{Mbuti}, \text{Kostenki})(X, \text{Lithuanians})$ . Positive values indicate that K14 is closer to Lithuanians than to X.

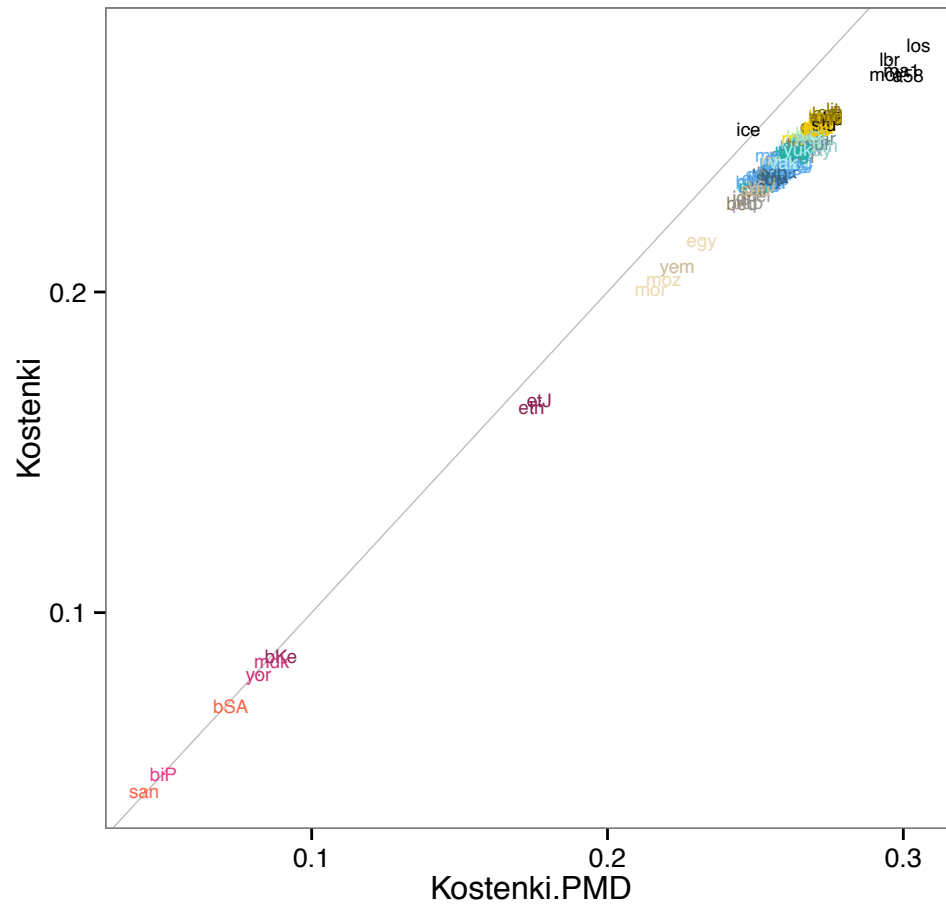

**Fig. S17**

Pairwise plot of “outgroup”  $f_3$  statistics, for dataset filtered with PMD > 3 (x axis) compared to the full dataset (y axis).



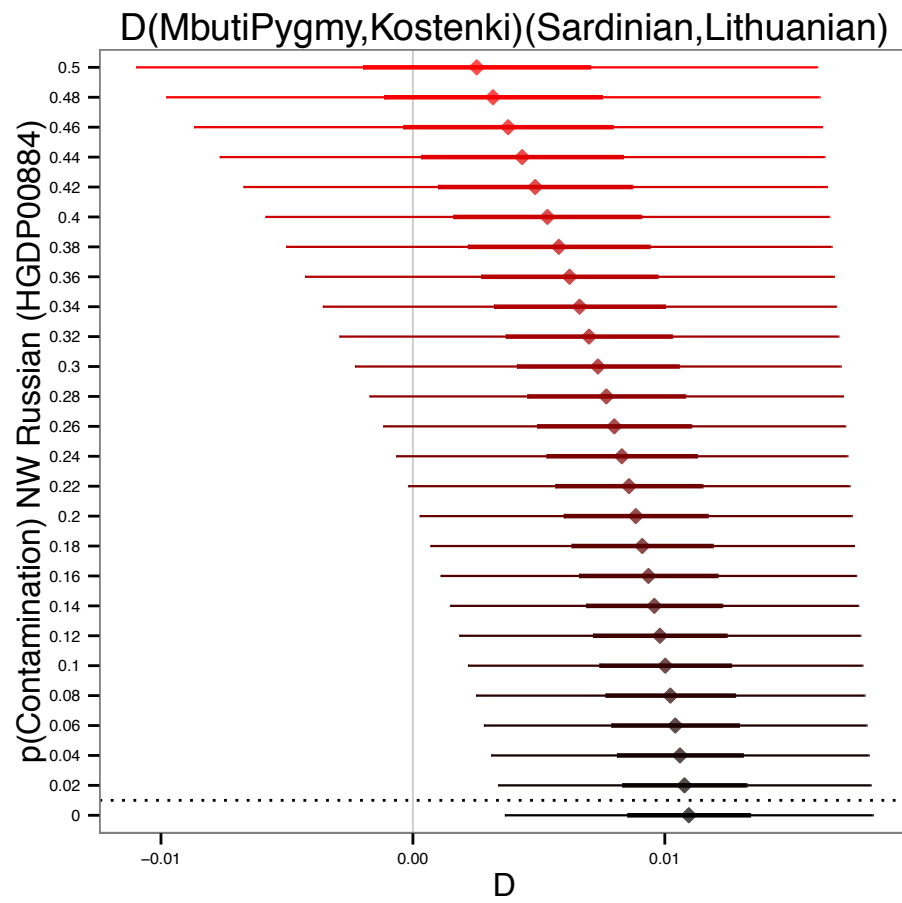

**Fig. S18**

Contamination-corrected D-statistics of the form  $D(\text{Mbuti Pygmy}, K14; \text{Sardinian}, \text{Lithuanian})$ , for different levels of contamination.

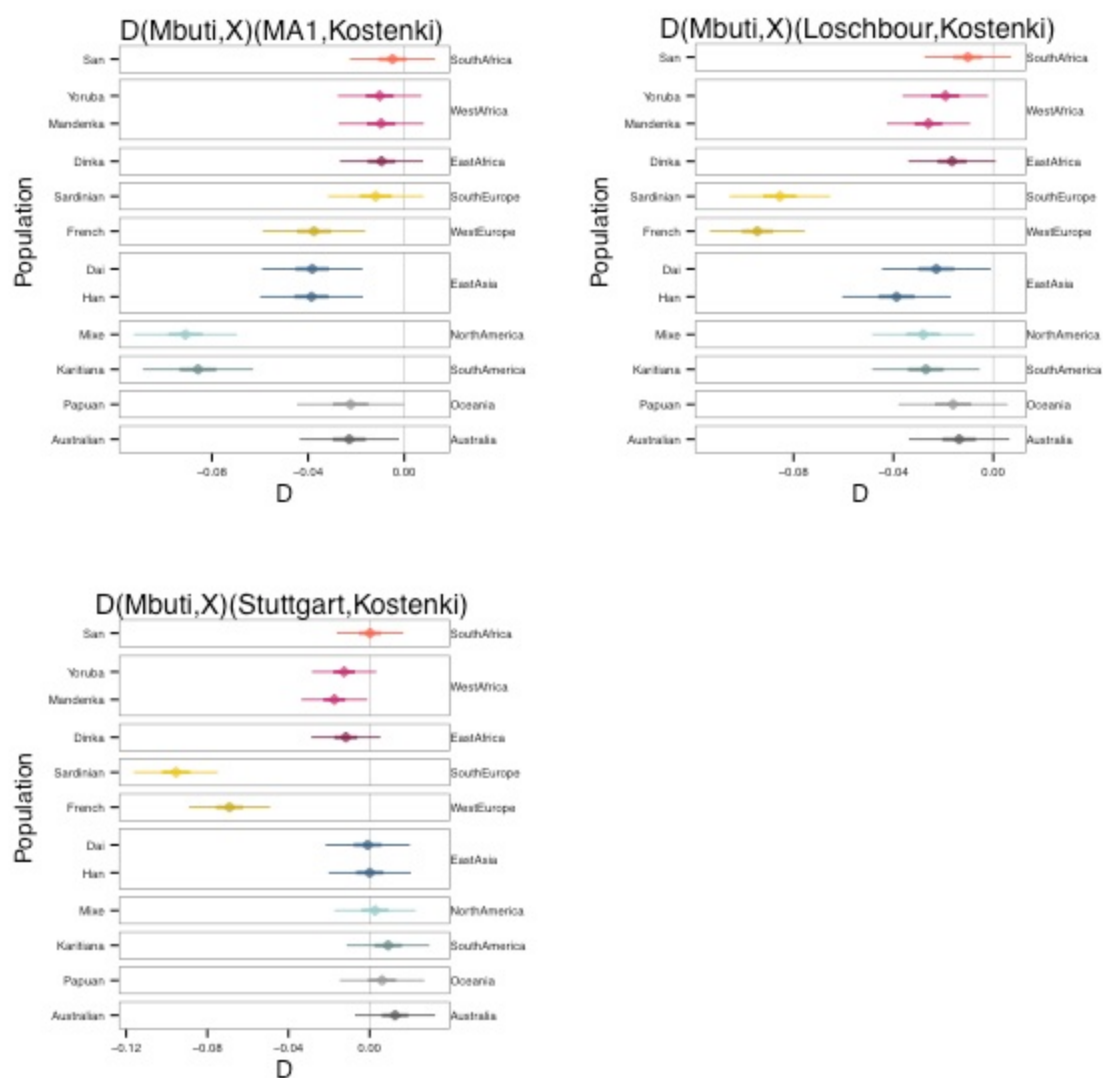

**Fig. S19**

Whole genome D-statistics of the form (Mbuti Pygmy, K14; Ancient<sub>1</sub>, K14) for MA1 (UPHG), Loschbour (MHG), Stuttgart (NEOL) and MA1. Results are from the Prufer et al. (2014) genome, similar patterns for other MHGs and within NEOL (Tables S10-S11).



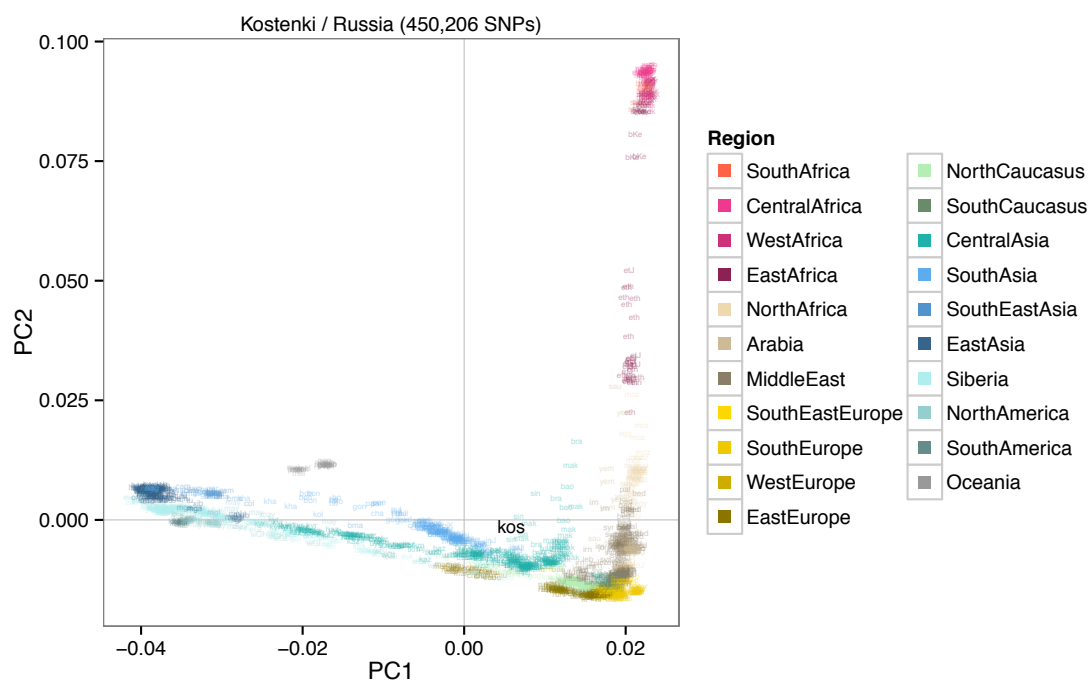

**Fig. S21**

PCA of K14 including a worldwide panel. PCAs were done using homozygous reference panel (randomly sampled hets) combined with K14 with a sample allele for each position.

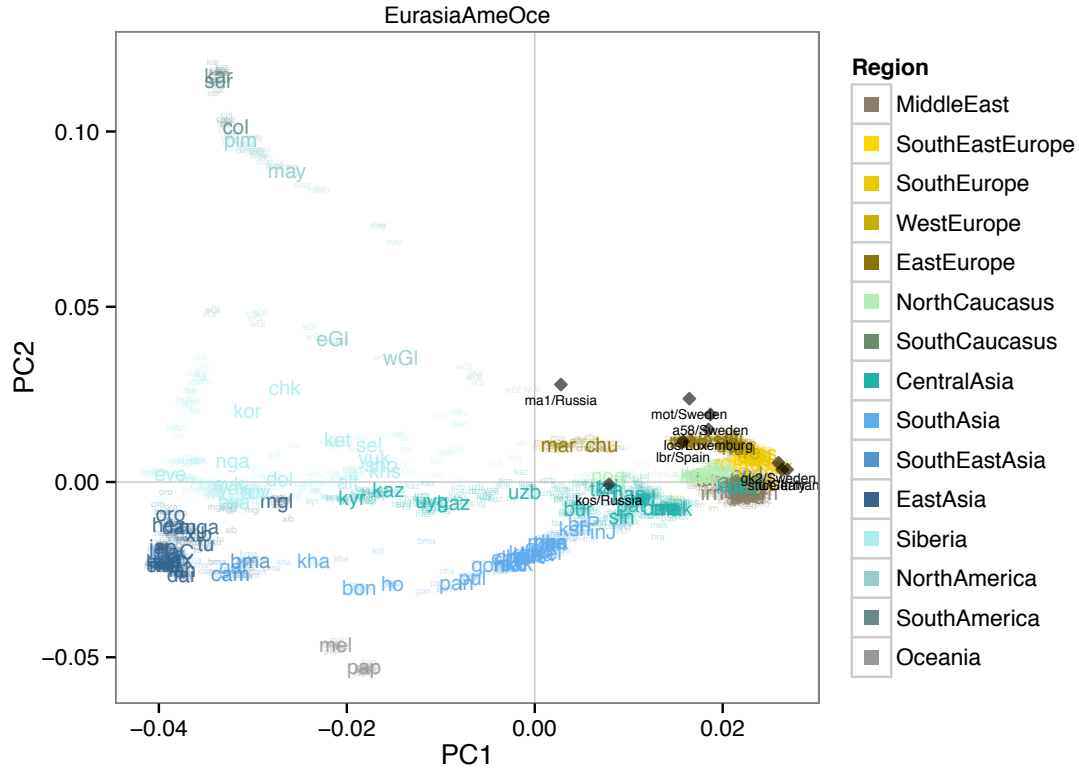

**Fig. S22**

Procrustes PCA of all ancient genomes on modern non-African populations. Bold letters indicate population average PC. Individual PCAs were done using homozygous reference panel (randomly sampled hets), then combined across ancient individuals using Procrustes.

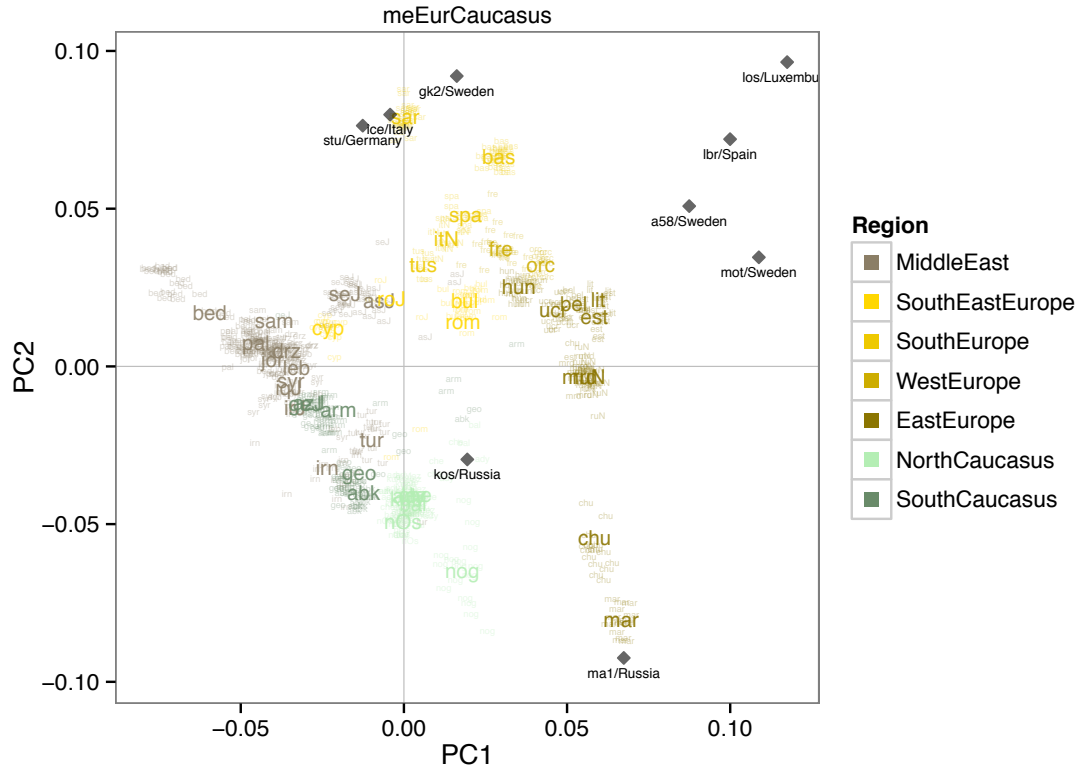

**Fig. S23**

Procrustes PCA of all ancient genomes on modern populations from Europe, Middle East and Caucasus. Bold letters indicate population average PC.

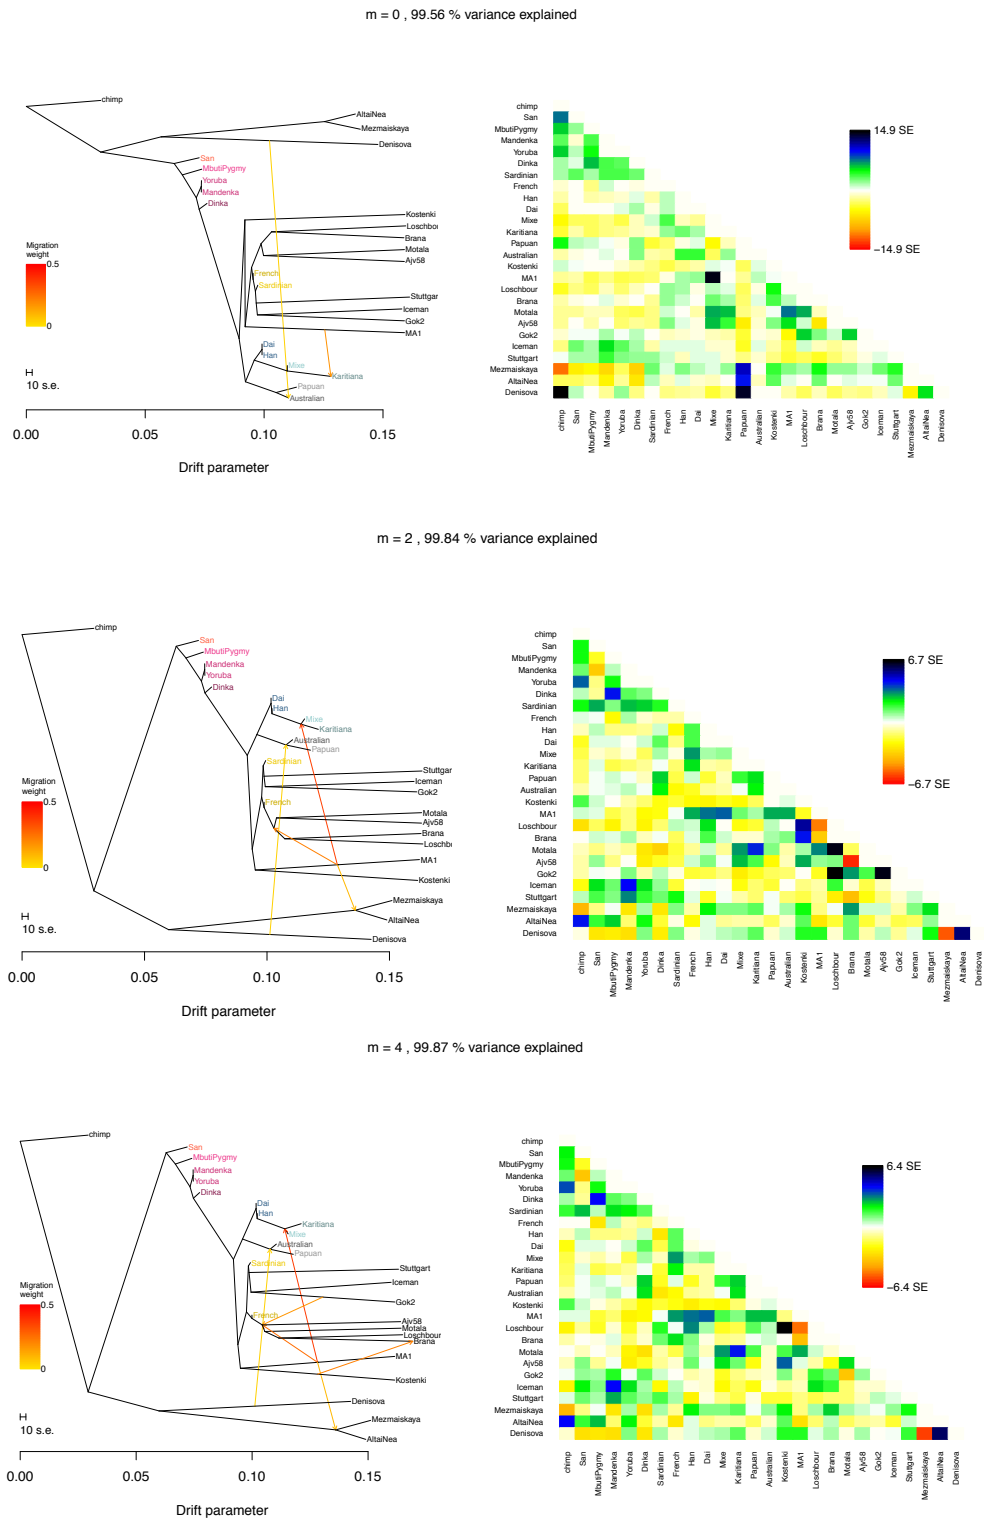

**Fig. S24**

Treemix on Prufer et al genomes. The first two migration edges were incorporated as known migrations in the tree building.

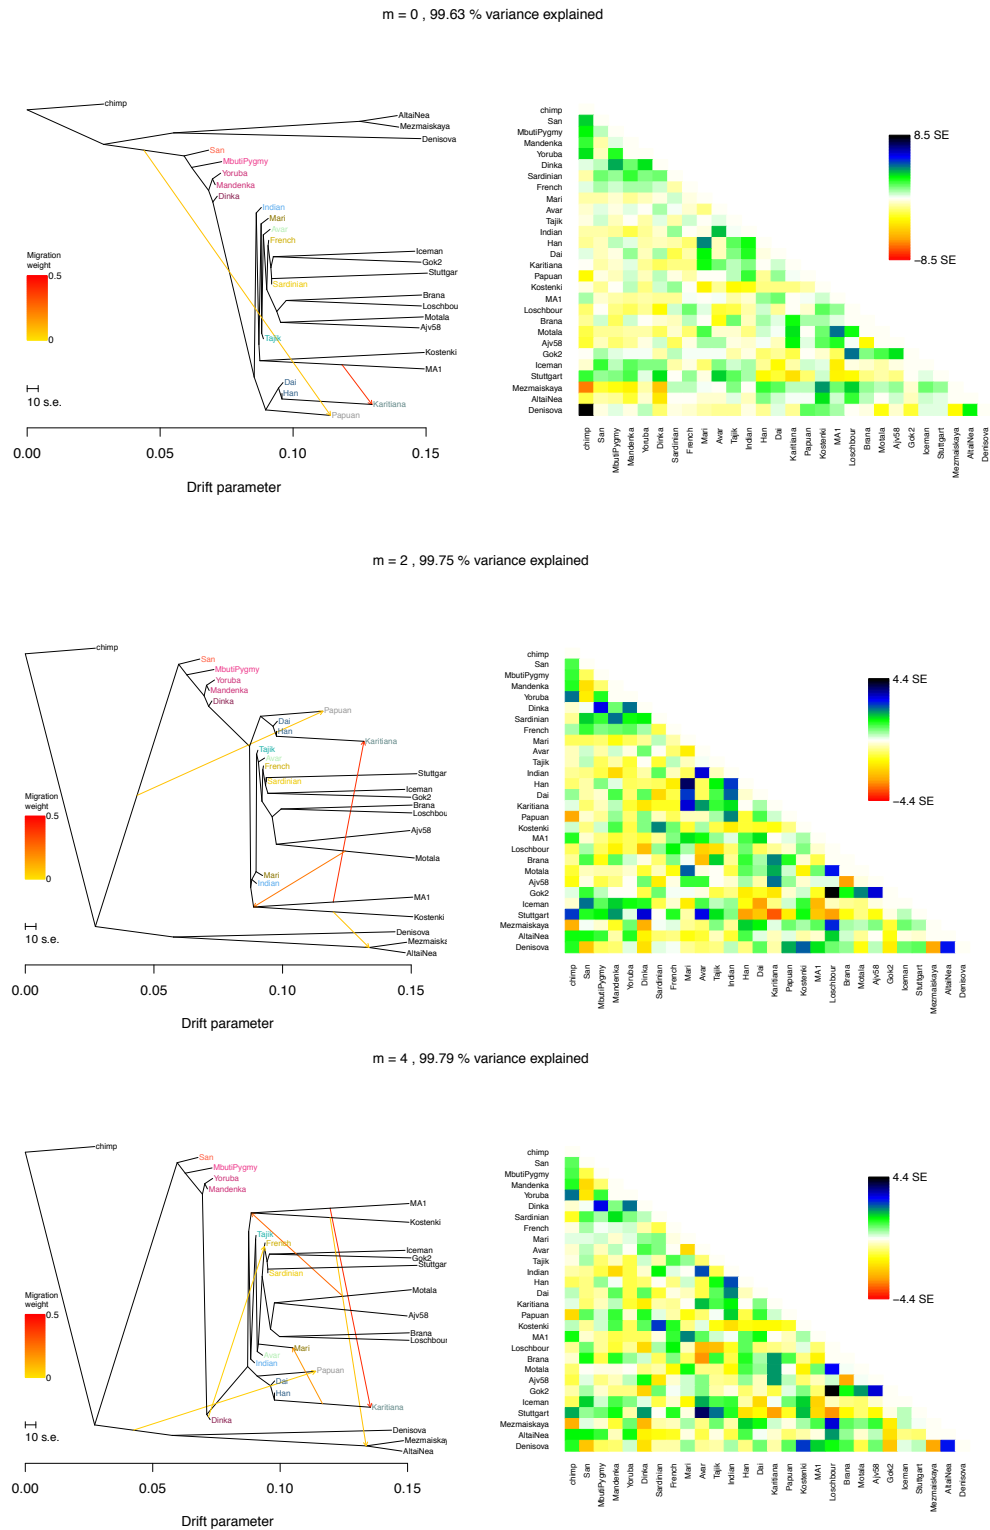

**Fig. S25**

Treemix on Raghavan et al genomes. The first two migration edges were incorporated as known migrations in the tree building.



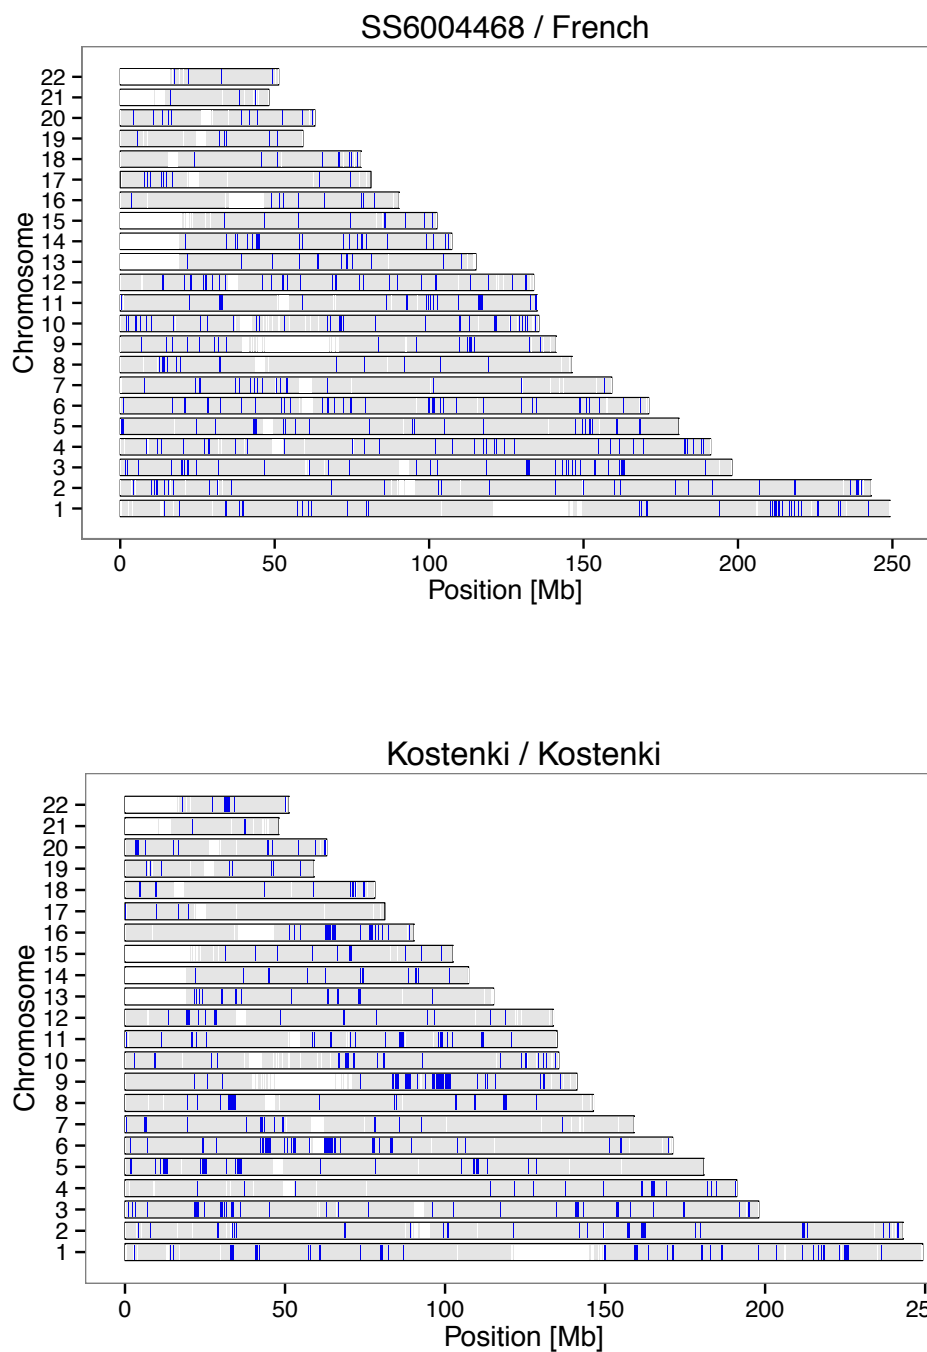

**Fig. S26**

Neanderthal chromosome painting. The tracts identified as Neanderthal (shown in blue) tend to be longer in K14 (lower panel) than a modern individual (e.g. French, upper panel).

**Table S1.**

Archeological layers in the western and eastern parts of Kostenki 14 (compiled after Sinitsyn 1996, Sinitsyn 2004, Sinitsyn 2010). Abbreviations explained in text.

| Cultural Layer              | Area          | Geological Context | Age (in ka cal BP)                         | Archaeological association                                                                                                                                                                                                                                                                                                                                                                              |
|-----------------------------|---------------|--------------------|--------------------------------------------|---------------------------------------------------------------------------------------------------------------------------------------------------------------------------------------------------------------------------------------------------------------------------------------------------------------------------------------------------------------------------------------------------------|
| CL I                        | West and East | CL                 | 27.6-26.5 (minimum age?)                   | a large assemblage of mammoth bones and lithics attributed to the 'Kostenki-Avdeev' culture                                                                                                                                                                                                                                                                                                             |
| CL II                       | West          | UHB                | 33.6-31.5                                  | 'Gorodsovian' industry: The very rich lithic assemblage is flake based, typical 'Upper Paleolithic' blades are missing. Various 'Middle Paleolithic' tool types (sidescrapers, points, knives) are present. CL II also contains an extensive bone industry including mammoth bone spatulas, decorated bones and personal ornaments.                                                                     |
| CL III                      | West and East | UHB                | 35.3-33.2                                  | The lithic assemblage here is more blade based, but the level also contains a bone industry. It has been suggested that it has affinities to the Gordodsovian, a local Mid Upper Palaeolithic industry found in the overlying CL II.                                                                                                                                                                    |
| Layer in Volcanic ash (LVA) | East          | WL                 | 39.3 (based on association with CI Y5 ash) | There is a small assemblage of artefacts (340) from within the volcanic ash. There are no cores, but evidence for unipolar striking with parallel dorsal scars, microblades, and micro-retouch. These have been interpreted as Dufour bladelets, and so provide an association with the Aurignacian (Sinitsyn 2003)                                                                                     |
| CL IV                       | West          | LHB                | Older than CI Y5 tephra                    | Blade dominated industry with unipolar blade production. Undiagnostic lithic tools including endscraper, burins and retouched flakes and blades. Some bone tools.                                                                                                                                                                                                                                       |
| CL IVa                      | East          | LHB                | 39.1-36 (minimum age?)                     | Few lithics, largely undiagnostic, with large numbers of horse bones.                                                                                                                                                                                                                                                                                                                                   |
| CL in FS                    | East          | LHB                | 40.8-37.5 (minimum age?)                   | Few, undiagnostic lithic and bone artefacts.                                                                                                                                                                                                                                                                                                                                                            |
| CL IVb                      | East          | LHB                | 42.2-39.9 (minimum age?)                   | Rich lithic assemblage, distinctively Upper Palaeolithic, and unlike most assemblages in the region. Contains end scrapers, burins, prismatic cores, plus a bone industry and a possible carved ivory horse head, and has been assigned to the Initial Upper Palaeolithic (IUP) by Sinitsyn (2003) <i>sensu lato</i> . Human tooth remains from this level were provisionally assigned to modern humans |

Table S2.

DNA extracts and summary statistics per library. P: silica pellets in solution approach (132).C: silica column-based approach (Dabney et al. 2013). USER: USER treated library (+). MBD: library enriched for methylated cytosines (+). %Endo: proportion of reads generated mapping uniquely against the human reference genome hg19 and passing quality filters. Cov.(X): average fold depth-of-coverage. The DNA libraries that have been selected for performing all downstream analyses based on contamination levels and error rates are indicated in bold. See details in SOM3-6.

|                                | Extraction method | Extract # | USER     | MBD      | %Endo.       | Cov.(X)        | Length |
|--------------------------------|-------------------|-----------|----------|----------|--------------|----------------|--------|
| All                            | NA                | NA        | NA       | NA       | 1.58%        | 2.84542        | 50.3   |
| K14_10c_ACAGAG_USER            | P                 | 1         | +        | -        | 0.98%        | 0.00552        | 50.2   |
| K14_10c_AGTGAG_USER            | P                 | 1         | +        | -        | 0.70%        | 0.03294        | 51.9   |
| K14_10c_CTCTGC_USER            | P                 | 1         | +        | -        | 0.99%        | 0.00214        | 50.7   |
| K14_10c_GAGTAG_USER            | P                 | 1         | +        | -        | 0.73%        | 0.03553        | 51.3   |
| K14_10c_GCTACT_USER            | P                 | 1         | +        | -        | 1.04%        | 0.00248        | 51.1   |
| K14_10c_TAGCTG_USER            | P                 | 1         | +        | -        | 0.81%        | 0.02288        | 50.6   |
| K14_14c_ACTGCG_USER            | P                 | 1         | +        | -        | 0.67%        | 0.03956        | 51.5   |
| K14_14c_CAGCAC_USER            | P                 | 1         | +        | -        | 0.77%        | 0.03236        | 51.3   |
| K14_14c_CGTAGT_USER            | P                 | 1         | +        | -        | 0.79%        | 0.02952        | 50.9   |
| K14_14c_GTCGTC_USER            | P                 | 1         | +        | -        | 0.73%        | 0.02592        | 51.0   |
| K14_14c_TACGAG_USER            | P                 | 1         | +        | -        | 0.73%        | 0.03290        | 51.4   |
| K14_14c_TCGATG_USER            | P                 | 1         | +        | -        | 1.05%        | 0.00287        | 50.5   |
| K14_TGAACA                     | P                 | 1         | -        | -        | 1.70%        | 0.00611        | 55.3   |
| K14_D1_2_CGTATA                | C                 | 2         | -        | -        | 0.45%        | 0.00278        | 49.9   |
| K14_D1_3_TGATCG                | C                 | 2         | -        | -        | 0.43%        | 0.00237        | 50.5   |
| K14_D1_CGCTAT                  | C                 | 2         | -        | -        | 0.44%        | 0.00313        | 48.8   |
| K14_D2_2_GTGTAT                | C                 | 3         | -        | -        | 0.57%        | 0.00263        | 48.3   |
| K14_D2_3_TGCATA                | C                 | 3         | -        | -        | 0.49%        | 0.00296        | 49.6   |
| K14_D2_TGAACA                  | C                 | 3         | -        | -        | 0.58%        | 0.00234        | 48.5   |
| K14_D3_USER_1_CGATGA           | C                 | 4         | +        | -        | 0.49%        | 0.00388        | 42.3   |
| K14_D3_USER_2_TGCATA           | C                 | 4         | +        | -        | 0.46%        | 0.00485        | 42.8   |
| K14_D3_USER_3_TCTCGC           | C                 | 5         | +        | -        | 0.30%        | 0.00283        | 43.0   |
| K14_D3_USER_4_TGATGC           | C                 | 5         | +        | -        | 0.30%        | 0.00306        | 43.1   |
| <b>K14_A1_S2_1_USER_CAGCTA</b> | <b>P</b>          | <b>6</b>  | <b>+</b> | <b>-</b> | <b>1.22%</b> | <b>0.19670</b> | 57.6   |
| <b>K14_A2_S2_1_USER</b>        | <b>P</b>          | <b>6</b>  | <b>+</b> | <b>-</b> | <b>1.15%</b> | <b>0.18102</b> | 56.7   |
| K14_B1_S2_1_USER_ACAGTG        | P                 | 6         | +        | +        | 0.06%        | 0.00097        | 68.5   |
| K14_B2_S2_1_USER_GCCAAT        | P                 | 6         | +        | +        | 0.01%        | 0.00075        | 66.6   |
| K14_USER_Met1_ATCACG           | P                 | 6         | +        | +        | 0.15%        | 0.00083        | 67.5   |
| K14_USER_Met2_TTAGGC           | P                 | 6         | +        | +        | 0.05%        | 0.00055        | 66.7   |
| <b>K14_S2_1_USER_36_TGCAGG</b> | <b>P</b>          | <b>6</b>  | <b>+</b> | <b>-</b> | <b>1.24%</b> | <b>0.17207</b> | 58.7   |
| <b>K14_S2_1_USER_37_ACTGCC</b> | <b>P</b>          | <b>7</b>  | <b>+</b> | <b>-</b> | <b>1.01%</b> | <b>0.22455</b> | 59.1   |
| K14_A3_S2_2_USER               | P                 | 7         | +        | -        | 0.56%        | 0.01776        | 66.9   |

|                             |          |           |          |          |              |                |      |
|-----------------------------|----------|-----------|----------|----------|--------------|----------------|------|
| K14_A4_S2_2_USER            | P        | 7         | +        | -        | 0.33%        | 0.01758        | 67.9 |
| K14_B3_S2_2_MetCap_USER     | P        | 7         | +        | +        | 0.05%        | 0.00112        | 69.2 |
| K14_B4_S2_2_MetCap_USER     | P        | 7         | +        | +        | 0.02%        | 0.00090        | 68.7 |
| K14_USER_Met3_ACTTGA        | P        | 7         | +        | +        | 0.14%        | 0.00091        | 67.7 |
| K14_USER_Met4_GATCAG        | P        | 7         | +        | +        | 0.10%        | 0.00064        | 66.9 |
| K14_10_TAGCTT               | P        | 8         | +        | -        | 0.12%        | 0.00030        | 50.1 |
| K14_11_GGCTAC               | P        | 8         | +        | -        | 0.13%        | 0.00036        | 50.6 |
| K14_12_CTTGTA               | P        | 8         | +        | -        | 0.12%        | 0.00066        | 51.0 |
| K14_33_GACCGG               | P        | 8         | +        | -        | 0.12%        | 0.00024        | 52.3 |
| K14_34_GAGATA               | P        | 8         | +        | -        | 0.12%        | 0.00038        | 50.1 |
| K14_35_CTGACA               | P        | 8         | +        | -        | 0.12%        | 0.00042        | 49.6 |
| K14_46_CACGAA               | P        | 8         | +        | -        | 0.12%        | 0.00040        | 51.2 |
| K14_47_CATAGA               | P        | 8         | +        | -        | 0.12%        | 0.00030        | 51.3 |
| K14_48_ACAGTC               | P        | 8         | +        | -        | 0.12%        | 0.00038        | 51.2 |
| K14_49_CATCGT               | P        | 8         | +        | -        | 0.12%        | 0.00065        | 52.8 |
| K14_50_TTGAAC               | P        | 8         | +        | -        | 0.12%        | 0.00071        | 50.9 |
| K14_5_ACAGTG                | P        | 8         | +        | -        | 0.12%        | 0.00063        | 49.7 |
| K14_6_GCCAAT                | P        | 8         | +        | -        | 0.12%        | 0.00080        | 50.9 |
| K14_7_CAGATC                | P        | 8         | +        | -        | 0.12%        | 0.00037        | 48.7 |
| K14_8_ACTTGA                | P        | 8         | +        | -        | 0.12%        | 0.00040        | 50.1 |
| K14_9_GATCAG                | P        | 8         | +        | -        | 0.12%        | 0.00021        | 50.4 |
| K14_1_ATCACG                | P        | 9         | +        | -        | 0.20%        | 0.00048        | 50.4 |
| K14_24_CGATGA               | P        | 9         | +        | -        | 0.20%        | 0.00066        | 48.1 |
| K14_2_CGATGT                | P        | 9         | +        | -        | 0.19%        | 0.00063        | 50.3 |
| K14_31_GACACT               | P        | 9         | +        | -        | 0.19%        | 0.00048        | 49.5 |
| K14_36_TGCAGG               | P        | 9         | +        | -        | 0.20%        | 0.00054        | 48.2 |
| K14_37_ACTGCC               | P        | 9         | +        | -        | 0.20%        | 0.00065        | 48.6 |
| K14_38_GCAACG               | P        | 9         | +        | -        | 0.19%        | 0.00054        | 48.3 |
| K14_39_CGACCT               | P        | 9         | +        | -        | 0.19%        | 0.00066        | 49.1 |
| K14_3_TTAGGC                | P        | 9         | +        | -        | 0.19%        | 0.00050        | 50.1 |
| K14_40_TGACGT               | P        | 9         | +        | -        | 0.19%        | 0.00058        | 49.5 |
| K14_41_TGTCTG               | P        | 9         | +        | -        | 0.19%        | 0.00055        | 49.1 |
| K14_42_ACGTGC               | P        | 9         | +        | -        | 0.19%        | 0.00045        | 49.3 |
| K14_43_TGATCC               | P        | 9         | +        | -        | 0.19%        | 0.00077        | 50.4 |
| K14_44_CTCTAG               | P        | 9         | +        | -        | 0.19%        | 0.00045        | 50.1 |
| K14_45_GAGAAG               | P        | 9         | +        | -        | 0.20%        | 0.00055        | 48.9 |
| K14_4_TGACCA                | P        | 9         | +        | -        | 0.19%        | 0.00061        | 51.5 |
| K14_S5_1_A_ATCACG           | P        | 10        | +        | -        | 2.46%        | 0.01581        | 39.3 |
| K14_S5_2_B_TTAGGC           | P        | 11        | +        | -        | 8.03%        | 0.03772        | 42.8 |
| <b>K14_S5_2_C_15_TGATCG</b> | <b>P</b> | <b>11</b> | <b>+</b> | <b>-</b> | <b>4.85%</b> | <b>0.56476</b> | 46.4 |
| <b>K14_S5_2_C_CAGATC</b>    | <b>P</b> | <b>11</b> | <b>+</b> | <b>-</b> | <b>3.84%</b> | <b>0.78320</b> | 46.0 |

|                        |   |    |   |   |       |         |      |
|------------------------|---|----|---|---|-------|---------|------|
| K14_S5_2_C_15_8_ACTTGA | P | 11 | + | - | 3.62% | 0.13211 | 53.6 |
| K14_S5_2_C_15_6_GCCAAT | P | 11 | + | - | 2.25% | 0.16526 | 53.5 |
| K14_S6_1_D_ACTTGA      | P | 12 | + | - | 0.97% | 0.00586 | 39.0 |
| K14_S6_2_E_GCCAAT      | P | 13 | + | - | 0.87% | 0.00302 | 42.9 |
| K14_S6_2_F_CTTGTA      | P | 13 | + | - | 0.92% | 0.00343 | 44.0 |

**Table S3.**

Contamination estimates based on the MT for libraries selected for downstream analyses. We used a method described in Fu et al. 2013 (see SOM5 for details). The maximum a posteriori probability estimate (MAP) and the lower and upper bound of the 95% credible interval are shown.

|                         | Contamination Estimate<br>based on MT (MAP) | 2.5% | 97.5% |
|-------------------------|---------------------------------------------|------|-------|
| K14                     | 3.8%                                        | 3.1% | 4.5%  |
| K14_A1_S2_1_USER_CAGCTA | 1.0%                                        | 0.3% | 3.1%  |
| K14_A2_S2_1_USER        | 1.8%                                        | 0.7% | 4.0%  |
| K14_S2_1_USER_36_TGCAGG | 3.0%                                        | 1.4% | 5.7%  |
| K14_S2_1_USER_37_ACTGCC | 2.2%                                        | 0.9% | 4.3%  |
| K14_S5_2_C_15_TGATCG    | 2.8%                                        | 1.8% | 4.3%  |
| K14_S5_2_C_CAGATC       | 5.7%                                        | 4.5% | 7.2%  |
| K14_S5_2_C_15_8_ACTTGA  | 2.0%                                        | 0.6% | 5.6%  |
| K14_S5_2_C_15_6_GCCAAT  | 2.0%                                        | 0.6% | 4.9%  |

**Table S4.**

Contamination estimates for the two X-based methods described in SOM S6.

X based contamination estimates for all libraries. See SOM6 for details. For some cases (“-”) contamination could not be estimated because either not enough data was available, or because the sample was a female.

| Library             | Method1 | SE    | Method2 | SE    |
|---------------------|---------|-------|---------|-------|
| K14_10c_ACAGAG_USER | 0.052   | 0.04  | 0.052   | 0.04  |
| K14_10c_AGTGAG_USER | 0.054   | 0.014 | 0.057   | 0.015 |
| K14_10c_CTCTGC_USER | 0.136   | 0.077 | 0.137   | 0.078 |
| K14_10c_GAGTAG_USER | 0.077   | 0.016 | 0.079   | 0.016 |
| K14_10c_GCTACT_USER | 0       | 0     | 0       | 0     |
| K14_10c_TAGCTG_USER | 0.047   | 0.016 | 0.047   | 0.015 |
| K14_10_TAGCTT       | 0.409   | 0.406 | 0.409   | 0.406 |
| K14_11_GGCTAC       | 0       | 0     | 0       | 0     |
| K14_12_CTTGTA       | 0.64    | 0     | 0.64    | 0     |
| K14_14c_ACTGCG_USER | 0.068   | 0.015 | 0.065   | 0.014 |
| K14_14c_CAGCAC_USER | 0.083   | 0.017 | 0.086   | 0.017 |
| K14_14c_CGTAGT_USER | 0.056   | 0.014 | 0.061   | 0.015 |
| K14_14c_GTCGTC_USER | 0.067   | 0.017 | 0.07    | 0.018 |
| K14_14c_TACGAG_USER | 0.047   | 0.014 | 0.046   | 0.013 |
| K14_14c_TCGATG_USER | 0.034   | 0.034 | 0.034   | 0.034 |
| K14_1_ATCACG        | 0.382   | 0.39  | 0.382   | 0.39  |
| K14_24_CGATGA       | 0.347   | 0.191 | 0.347   | 0.191 |
| K14_2_CGATGT        | 0.323   | 0.225 | 0.323   | 0.225 |
| K14_31_GACACT       | 0.634   | 0.009 | 0.634   | 0.009 |
| K14_33_GACCGG       | 0.435   | NA    | 0.435   | NA    |
| K14_34_GAGATA       | 0.47    | 0.406 | 0.47    | 0.406 |
| K14_35_CTGACA       | 0       | 0     | 0       | 0     |
| K14_36_TGCAGG       | 0.217   | 0.251 | 0.217   | 0.251 |
| K14_37_ACTGCC       | 0.535   | 0.099 | 0.535   | 0.099 |
| K14_38_GCAACG       | 1       | 0     | 1       | 0     |
| K14_39_CGACCT       | 0.358   | 0.195 | 0.358   | 0.195 |
| K14_3_TTAGGC        | 0.448   | 0.241 | 0.448   | 0.241 |
| K14_40_TGACGT       | 0.145   | 0.148 | 0.145   | 0.148 |
| K14_41_TGTCTG       | 0.227   | 0.233 | 0.227   | 0.233 |
| K14_42_ACGTGC       | 0.545   | 0.129 | 0.545   | 0.129 |
| K14_43_TGATCC       | 0.769   | 0     | 0.769   | 0     |
| K14_44_CTCTAG       | 0.426   | 0.426 | 0.426   | 0.426 |
| K14_45_GAGAAG       | 0.534   | 0.162 | 0.534   | 0.162 |

|                             |       |       |       |       |
|-----------------------------|-------|-------|-------|-------|
| K14_46_CACGAA               | 0     | 0     | 0     | 0     |
| K14_47_CATAGA               | 0     | 0     | 0     | 0     |
| k14_48_ACAGTC               | 0.38  | 0.393 | 0.38  | 0.393 |
| K14_49_CATCGT               | 0     | 0     | 0     | 0     |
| K14_4_TGACCA                | 0.901 | 0     | 0.901 | 0     |
| K14_50_TTGAAC               | 0.389 | 0.27  | 0.389 | 0.27  |
| K14_5_ACAGTG                | 0.34  | 0.371 | 0.34  | 0.371 |
| K14_6_GCCAAT                | 0.433 | 0.292 | 0.433 | 0.292 |
| K14_7_CAGATC                | 0     | 0     | 0     | 0     |
| K14_8_ACTTGA                | 0     | 0     | 0     | 0     |
| K14_9_GATCAG                | 0     | NA    | 0     | NA    |
| K14_A1_S2_1_USER_CAGCTA     | 0.029 | 0.004 | 0.029 | 0.005 |
| K14_A2_S2_1_USER            | 0.036 | 0.005 | 0.034 | 0.005 |
| K14_A3_S2_2_USER            | 0.181 | 0.034 | 0.175 | 0.034 |
| K14_A4_S2_2_USER            | 0.332 | 0.048 | 0.33  | 0.049 |
| K14_B1_S2_1_USER_ACAGTG     | 0.403 | 0.157 | 0.383 | 0.141 |
| K14_B2_S2_1_USER_GCCAAT     | 0.342 | 0.148 | 0.389 | 0.16  |
| K14_B3_S2_2_MetCap_USER     | 0.738 | 0     | 0.787 | 0     |
| K14_B4_S2_2_MetCap_USER     | 0.871 | 0     | 0.821 | 0     |
| K14_Dabney_D3_USER_1_CGATGA | 0.054 | 0.049 | 0.054 | 0.049 |
| K14_Dabney_D3_USER_2_TGCATA | 0.18  | 0.066 | 0.18  | 0.066 |
| K14_Dabney_D3_USER_3_TCTCGC | 0.042 | 0.042 | 0.042 | 0.042 |
| K14_Dabney_D3_USER_4_TGATGC | 0.126 | 0.071 | 0.126 | 0.071 |
| K14_S5_1_A_ATCACG           | 0.03  | 0.016 | 0.03  | 0.016 |
| K14_S5_2_B_TTAGGC           | 0.005 | 0.006 | 0.005 | 0.006 |
| K14_S5_2_C_15_6_GCCAAT      | 0.019 | 0.004 | 0.02  | 0.004 |
| K14_S5_2_C_15_8_ACTTGA      | 0.02  | 0.004 | 0.02  | 0.005 |
| K14_S5_2_C_15_TGATCG        | 0.02  | 0.002 | 0.02  | 0.002 |
| K14_S5_2_C_CAGATC           | 0.028 | 0.002 | 0.027 | 0.003 |
| K14_S6_1_D_ACTTGA           | 0.049 | 0.036 | 0.049 | 0.036 |
| K14_S6_2_E_GCCAAT           | 0     | 0     | 0     | 0     |
| K14_S6_2_F_CTTGTA           | 0.106 | 0.063 | 0.106 | 0.063 |
| K14_USER_Met1_ATCACG        | 0.691 | 0     | 0.691 | 0     |
| K14_USER_Met2_TTAGGC        | 0.732 | 0     | 0.732 | 0     |
| K14_USER_Met3_ACTTGA        | 0.424 | 0.149 | 0.441 | 0.152 |
| K14_USER_Met4_GATCAG        | 0.224 | 0.15  | 0.248 | 0.157 |
| S2_1_USER_36_TGCAGG         | 0.031 | 0.005 | 0.033 | 0.005 |
| S2_1_USER_37_ACTGCC         | 0.04  | 0.005 | 0.041 | 0.005 |



**Table S5.**

X-based contamination estimates for ancient samples (SOM S6).

X based contamination estimates. See SOM6 for details. For some cases (“-“) contamination could not be estimated because either not enough data was available, or because the sample was a female.

| <i>Sample</i>   | Method 1        |           | Method 2        |           |
|-----------------|-----------------|-----------|-----------------|-----------|
|                 | <i>Estimate</i> | <i>SE</i> | <i>Estimate</i> | <i>SE</i> |
| K14             | 0.024           | 0.0011    | 0.021           | 0.0019    |
| K14 5bp trimmed | 0.020           | 0.0012    | 0.020           | 0.0019    |
| Loschbour       | 0.0049          | 0.00028   | 0.0057          | 0.00089   |
| Motala1         | -               | -         | -               | -         |
| Motala2         | 0.010           | 0.010     | 6.6E-05         | 0         |
| Motala3         | 0.0043          | 0.0021    | 0.0073          | 0.0039    |
| Motala4         | -               | -         | -               | -         |
| Motala6         | 6.6E-05         | 0.075     | 6.6E-05         | 0.075     |
| Motala9         | -               | -         | -               | -         |
| Motala12        | 0.0032          | 0.00053   | 0.0031          | 0.00091   |
| Ajv58           | 0.012           | 0.0014    | 0.012           | 0.0022    |
| Brana1          | 0.008           | 0.001     | 0.004           | 0.0018    |
| Brana2          | 0.006           | 0.0012    | 0.004           | 0.0019    |
| E733            | 0.030           | 0.0028    | 0.026           | 0.0040    |
| Gok2            | -               | -         | -               | -         |
| Iceman          | 0.012           | 0.00069   | 0.013           | 0.0013    |
| LBK             | -               | -         | -               | -         |
| MA1             | 0.013           | 0.002     | 0.0087          | 0.00289   |

**Table S6.**

ISOGG chromosome Y SNPs with derived allele in K14.

| isoggId | haplogroup           | position | mutation | K14 | depth | isDamage |
|---------|----------------------|----------|----------|-----|-------|----------|
| L990    | A0                   | 14001289 | A->G     | G   | 2     | FALSE    |
| L1085   | A0-T                 | 2790726  | T->C     | C   | 1     | FALSE    |
| L1089   | A0-T                 | 2887280  | G->C     | C   | 1     | FALSE    |
| L1105   | A0-T                 | 7590048  | C->T     | T   | 1     | TRUE     |
| L1116   | A0-T                 | 13888035 | A->C     | C   | 2     | FALSE    |
| L1120   | A0-T                 | 14496439 | G->T     | T   | 3     | FALSE    |
| L1121   | A0-T                 | 14496448 | G->A     | A   | 2     | TRUE     |
| L1123   | A0-T                 | 15425676 | C->T     | T   | 2     | TRUE     |
| L1128   | A0-T                 | 16428812 | C->T     | T   | 1     | TRUE     |
| L1129   | A0-T                 | 16596846 | T->C     | C   | 3     | FALSE    |
| L1130   | A0-T                 | 16661010 | T->G     | G   | 3     | FALSE    |
| L1132   | A0-T                 | 16718811 | A->G     | G   | 2     | FALSE    |
| L1137   | A0-T                 | 19047091 | C->T     | T   | 2     | TRUE     |
| L1145   | A0-T                 | 21739790 | C->T     | T   | 1     | TRUE     |
| L1150   | A0-T                 | 21903971 | A->G     | G   | 1     | FALSE    |
| L1155   | A0-T                 | 22191266 | G->C     | C   | 1     | FALSE    |
| L1002   | A1                   | 16392856 | A->T     | T   | 1     | FALSE    |
| L1004   | A1                   | 16773792 | T->C     | C   | 1     | FALSE    |
| L1009   | A1                   | 18180294 | A->G     | G   | 1     | FALSE    |
| L1013   | A1                   | 21646577 | C->A     | A   | 1     | FALSE    |
| L1053   | A1                   | 18759708 | C->A     | A   | 1     | FALSE    |
| L1084   | A1                   | 22957136 | G->A     | A   | 1     | TRUE     |
| L1112   | A1                   | 8466995  | G->A     | A   | 2     | TRUE     |
| L985    | A1                   | 7374927  | A->C     | C   | 1     | FALSE    |
| L989    | A1                   | 23551003 | T->A     | A   | 3     | FALSE    |
| V168    | A1                   | 17947672 | G->A     | A   | 1     | TRUE     |
| V238    | A1                   | 7651556  | G->T     | T   | 1     | FALSE    |
| V221    | A1b                  | 7589303  | G->T     | T   | 1     | FALSE    |
| M141    | A1b1a1               | 21705977 | T->A     | A   | 2     | FALSE    |
| M118    | A1b1b2b1             | 21763965 | A->T     | T   | 3     | FALSE    |
| V234    | B<br>(Investigation) | 7644670  | C->T     | T   | 1     | TRUE     |
| V237    | B<br>(Investigation) | 7647511  | C->T     | T   | 1     | TRUE     |
| 50f2(P) | B2b1                 | 23497067 | G->C     | C   | 2     | FALSE    |
| L1060   | BT                   | 21183571 | C->T     | T   | 4     | TRUE     |
| L1061   | BT                   | 22191243 | G->A     | A   | 1     | TRUE     |
| L957    | BT                   | 14079528 | C->T     | T   | 1     | TRUE     |
| L969    | BT                   | 21674225 | T->C     | C   | 1     | FALSE    |

|          |                      |          |        |   |   |       |
|----------|----------------------|----------|--------|---|---|-------|
| L977     | BT                   | 23302389 | A->G   | G | 1 | FALSE |
| M299     | BT                   | 22748506 | T->G   | G | 1 | FALSE |
| M42      | BT                   | 21866840 | A->T   | T | 2 | FALSE |
| M91      | BT                   | 21907538 | del->T | T | 1 | FALSE |
| P97      | BT                   | 14886273 | G->T   | T | 2 | FALSE |
| Page65.1 | BT                   | 2657176  | T->C   | C | 2 | FALSE |
| PF1403   | BT                   | 2756519  | T->C   | C | 4 | FALSE |
| PF1411   | BT                   | 17037979 | C->T   | T | 1 | TRUE  |
| V202     | BT                   | 2790584  | G->C   | C | 1 | FALSE |
| P255     | C                    | 8685038  | G->A   | A | 1 | TRUE  |
| V183     | C                    | 14263271 | G->A   | A | 1 | TRUE  |
| V199     | C                    | 2772928  | C->A   | A | 2 | FALSE |
| V232     | C                    | 7629098  | T->C   | C | 1 | FALSE |
| F3393    | C1                   | 23023974 | C->A   | A | 1 | FALSE |
| CTS3818  | CF                   | 15203676 | A->G   | G | 3 | FALSE |
| CTS6376  | CF                   | 16863259 | C->G   | G | 2 | FALSE |
| M168     | CT                   | 14813991 | C->T   | T | 2 | TRUE  |
| M294     | CT                   | 22744945 | C->T   | T | 2 | TRUE  |
| 22457    | D1b1a2               | 24464597 | C->G   | G | 1 | FALSE |
| Z1518    | D1b2                 | 8069557  | C->T   | T | 4 | TRUE  |
| M5564    | E                    | 23463283 | G->A   | A | 1 | TRUE  |
| Z15165   | E1a2                 | 23958822 | T->C   | C | 2 | FALSE |
| Z14907   | E1a2b1a1a1           | 7787335  | G->T   | T | 3 | FALSE |
| Z16208   | E1b1a1a1c2c3c        | 22542408 | T->A   | A | 4 | FALSE |
| CTS2590  | E2                   | 14376035 | G->A   | A | 1 | TRUE  |
| P135     | F                    | 21618856 | C->T   | T | 1 | TRUE  |
| Z14050   | H1b1                 | 14013176 | G->A   | A | 1 | TRUE  |
| Z14173   | H1b1                 | 23004423 | G->A   | A | 1 | TRUE  |
| P80      | H1b1a                | 6739899  | G->C   | C | 1 | FALSE |
| P266     | H1b1b                | 6739738  | A->T   | T | 2 | FALSE |
| Z14350   | H1b2a                | 16314520 | G->T   | T | 3 | FALSE |
| Z13393   | H3a                  | 17248422 | G->T   | T | 1 | FALSE |
| CTS616   | I2a2a1               | 6906332  | C->G   | G | 1 | FALSE |
| L1228    | I2a2a2               | 15446045 | C->G   | G | 1 | FALSE |
| Z1842    | J1a3a                | 21138032 | C->T   | T | 1 | TRUE  |
| P329     | L1a                  | 8466781  | G->A   | A | 1 | TRUE  |
| L58      | N<br>(Investigation) | 6670461  | T->G   | G | 1 | FALSE |
| N10      | O (Private)          | 21900347 | C->G   | G | 1 | FALSE |
| P103     | O (Private)          | 15477831 | G->C   | C | 5 | FALSE |
| M199     | Q1a2a1a1c            | 15031110 | del->G | G | 1 | FALSE |

**Table S7.**

*D*-statistics for *D*(Mbuti,K14)(X,Lithuanians). Positive values indicate K14 closer to Lithuanians.

| p1         | p2       | p3               | p4          | D     | sdJK  | Z     | nSites |
|------------|----------|------------------|-------------|-------|-------|-------|--------|
| MbutiPygmy | Kostenki | San              | Lithuanians | 0.356 | 0.004 | 101.3 | 359444 |
| MbutiPygmy | Kostenki | BantuSouthAfrica | Lithuanians | 0.314 | 0.003 | 93.3  | 370007 |
| MbutiPygmy | Kostenki | MbutiPygmy       | Lithuanians | 0.446 | 0.003 | 144.2 | 375124 |
| MbutiPygmy | Kostenki | BiakaPygmy       | Lithuanians | 0.345 | 0.003 | 105.8 | 373707 |
| MbutiPygmy | Kostenki | Mandenka         | Lithuanians | 0.293 | 0.003 | 89.9  | 374355 |
| MbutiPygmy | Kostenki | Yoruba           | Lithuanians | 0.299 | 0.003 | 93.0  | 374465 |
| MbutiPygmy | Kostenki | BantuKenya       | Lithuanians | 0.291 | 0.003 | 90.8  | 373029 |
| MbutiPygmy | Kostenki | Ethiopians       | Lithuanians | 0.170 | 0.003 | 66.0  | 372661 |
| MbutiPygmy | Kostenki | EthiopianJews    | Lithuanians | 0.166 | 0.003 | 63.4  | 370132 |
| MbutiPygmy | Kostenki | Egyptians        | Lithuanians | 0.078 | 0.002 | 36.7  | 366456 |
| MbutiPygmy | Kostenki | Mozabite         | Lithuanians | 0.101 | 0.002 | 46.1  | 372678 |
| MbutiPygmy | Kostenki | Moroccan         | Lithuanians | 0.106 | 0.002 | 45.3  | 367252 |
| MbutiPygmy | Kostenki | MoroccanJews     | Lithuanians | 0.032 | 0.002 | 17.1  | 361083 |
| MbutiPygmy | Kostenki | Yemenis          | Lithuanians | 0.093 | 0.002 | 37.5  | 365290 |
| MbutiPygmy | Kostenki | YemeniJews       | Lithuanians | 0.046 | 0.002 | 21.7  | 361552 |
| MbutiPygmy | Kostenki | Saudis           | Lithuanians | 0.048 | 0.002 | 24.3  | 366080 |
| MbutiPygmy | Kostenki | Iranians         | Lithuanians | 0.034 | 0.002 | 18.4  | 364217 |
| MbutiPygmy | Kostenki | IranJews         | Lithuanians | 0.028 | 0.002 | 11.4  | 349376 |
| MbutiPygmy | Kostenki | IraqiJews        | Lithuanians | 0.027 | 0.002 | 13.2  | 356593 |
| MbutiPygmy | Kostenki | Jordanian        | Lithuanians | 0.053 | 0.002 | 29.1  | 367766 |
| MbutiPygmy | Kostenki | Syrians          | Lithuanians | 0.039 | 0.002 | 21.1  | 363528 |
| MbutiPygmy | Kostenki | Bedouin          | Lithuanians | 0.056 | 0.002 | 30.7  | 372048 |
| MbutiPygmy | Kostenki | Druze            | Lithuanians | 0.029 | 0.002 | 16.9  | 365393 |
| MbutiPygmy | Kostenki | Palestinian      | Lithuanians | 0.049 | 0.002 | 27.4  | 370956 |
| MbutiPygmy | Kostenki | Samaritans       | Lithuanians | 0.029 | 0.003 | 9.1   | 345872 |
| MbutiPygmy | Kostenki | AshkenaziJews    | Lithuanians | 0.022 | 0.002 | 12.2  | 360331 |
| MbutiPygmy | Kostenki | SephardicJews    | Lithuanians | 0.025 | 0.002 | 14.9  | 362002 |
| MbutiPygmy | Kostenki | Lebanese         | Lithuanians | 0.039 | 0.002 | 17.6  | 356388 |
| MbutiPygmy | Kostenki | Turkish          | Lithuanians | 0.022 | 0.002 | 12.9  | 361542 |
| MbutiPygmy | Kostenki | Cypriots         | Lithuanians | 0.024 | 0.002 | 12.7  | 357847 |
| MbutiPygmy | Kostenki | Bulgarians       | Lithuanians | 0.012 | 0.002 | 7.4   | 356986 |
| MbutiPygmy | Kostenki | Romanian         | Lithuanians | 0.010 | 0.002 | 6.3   | 358900 |
| MbutiPygmy | Kostenki | RomanianJews     | Lithuanians | 0.018 | 0.003 | 6.8   | 347244 |
| MbutiPygmy | Kostenki | NorthItalian     | Lithuanians | 0.008 | 0.002 | 4.7   | 356188 |
| MbutiPygmy | Kostenki | Tuscan           | Lithuanians | 0.013 | 0.002 | 6.8   | 353549 |

|            |          |                |             |       |       |      |        |
|------------|----------|----------------|-------------|-------|-------|------|--------|
| MbutiPygmy | Kostenki | Sardinian      | Lithuanians | 0.011 | 0.002 | 6.7  | 360703 |
| MbutiPygmy | Kostenki | Spanish        | Lithuanians | 0.011 | 0.002 | 6.4  | 357028 |
| MbutiPygmy | Kostenki | Basque         | Lithuanians | 0.004 | 0.002 | 2.7  | 358550 |
| MbutiPygmy | Kostenki | French         | Lithuanians | 0.006 | 0.001 | 4.3  | 360938 |
| MbutiPygmy | Kostenki | Orcadian       | Lithuanians | 0.004 | 0.002 | 2.6  | 356124 |
| MbutiPygmy | Kostenki | Hungarians     | Lithuanians | 0.006 | 0.001 | 4.2  | 359039 |
| MbutiPygmy | Kostenki | Ucranians      | Lithuanians | 0.005 | 0.001 | 3.5  | 358596 |
| MbutiPygmy | Kostenki | Belarusians    | Lithuanians | 0.003 | 0.002 | 1.6  | 352836 |
| MbutiPygmy | Kostenki | Estonians      | Lithuanians | 0.002 | 0.001 | 1.2  | 357377 |
| MbutiPygmy | Kostenki | NWRussian      | Lithuanians | 0.005 | 0.001 | 3.4  | 360485 |
| MbutiPygmy | Kostenki | Mordovians     | Lithuanians | 0.005 | 0.002 | 3.1  | 357522 |
| MbutiPygmy | Kostenki | Chuvashs       | Lithuanians | 0.010 | 0.002 | 6.0  | 359426 |
| MbutiPygmy | Kostenki | Maris          | Lithuanians | 0.011 | 0.002 | 5.6  | 357905 |
| MbutiPygmy | Kostenki | Adygei         | Lithuanians | 0.017 | 0.002 | 9.6  | 359236 |
| MbutiPygmy | Kostenki | Balkars        | Lithuanians | 0.019 | 0.002 | 10.9 | 360168 |
| MbutiPygmy | Kostenki | Chechens       | Lithuanians | 0.016 | 0.002 | 8.9  | 359511 |
| MbutiPygmy | Kostenki | Kumyks         | Lithuanians | 0.017 | 0.002 | 8.8  | 358920 |
| MbutiPygmy | Kostenki | Lezgins        | Lithuanians | 0.015 | 0.002 | 8.6  | 359173 |
| MbutiPygmy | Kostenki | Nogais         | Lithuanians | 0.019 | 0.002 | 10.4 | 360901 |
| MbutiPygmy | Kostenki | NorthOssetians | Lithuanians | 0.020 | 0.002 | 10.8 | 358941 |
| MbutiPygmy | Kostenki | Abhkasians     | Lithuanians | 0.019 | 0.002 | 10.8 | 359704 |
| MbutiPygmy | Kostenki | Armenians      | Lithuanians | 0.020 | 0.002 | 11.8 | 362558 |
| MbutiPygmy | Kostenki | Georgians      | Lithuanians | 0.019 | 0.002 | 10.6 | 359307 |
| MbutiPygmy | Kostenki | GeorgianJews   | Lithuanians | 0.028 | 0.002 | 12.4 | 354289 |
| MbutiPygmy | Kostenki | AzerbaijanJews | Lithuanians | 0.025 | 0.002 | 10.1 | 349140 |
| MbutiPygmy | Kostenki | Kurds          | Lithuanians | 0.023 | 0.002 | 10.4 | 352564 |
| MbutiPygmy | Kostenki | Turkmens       | Lithuanians | 0.025 | 0.002 | 13.2 | 361660 |
| MbutiPygmy | Kostenki | Kazakhs        | Lithuanians | 0.026 | 0.002 | 11.4 | 361465 |
| MbutiPygmy | Kostenki | Uzbeks         | Lithuanians | 0.026 | 0.002 | 13.5 | 363636 |
| MbutiPygmy | Kostenki | UzbekJews      | Lithuanians | 0.026 | 0.003 | 8.8  | 344864 |
| MbutiPygmy | Kostenki | Kyrgyzians     | Lithuanians | 0.029 | 0.003 | 11.1 | 361495 |
| MbutiPygmy | Kostenki | Uygur          | Lithuanians | 0.026 | 0.002 | 11.4 | 358883 |
| MbutiPygmy | Kostenki | Hazara         | Lithuanians | 0.026 | 0.002 | 12.3 | 363809 |
| MbutiPygmy | Kostenki | Tajiks         | Lithuanians | 0.021 | 0.002 | 12.5 | 362577 |
| MbutiPygmy | Kostenki | Burusho        | Lithuanians | 0.025 | 0.002 | 12.5 | 362829 |
| MbutiPygmy | Kostenki | Pashtun        | Lithuanians | 0.023 | 0.002 | 9.9  | 352263 |
| MbutiPygmy | Kostenki | Balochi        | Lithuanians | 0.034 | 0.002 | 17.4 | 365085 |
| MbutiPygmy | Kostenki | Brahui         | Lithuanians | 0.035 | 0.002 | 17.8 | 365161 |
| MbutiPygmy | Kostenki | Kalash         | Lithuanians | 0.022 | 0.002 | 10.3 | 357915 |
| MbutiPygmy | Kostenki | Makrani        | Lithuanians | 0.047 | 0.002 | 23.5 | 368267 |
| MbutiPygmy | Kostenki | Pathan         | Lithuanians | 0.024 | 0.002 | 13.1 | 362450 |

|            |          |                            |             |       |       |      |        |
|------------|----------|----------------------------|-------------|-------|-------|------|--------|
| MbutiPygmy | Kostenki | Sindhi                     | Lithuanians | 0.036 | 0.002 | 18.1 | 366118 |
| MbutiPygmy | Kostenki | Bengali                    | Lithuanians | 0.033 | 0.004 | 8.0  | 342446 |
| MbutiPygmy | Kostenki | Bhunja                     | Lithuanians | 0.043 | 0.004 | 9.8  | 343330 |
| MbutiPygmy | Kostenki | BrahminsUttaranchal        | Lithuanians | 0.034 | 0.004 | 7.9  | 342633 |
| MbutiPygmy | Kostenki | BrahminsUttarPradesh       | Lithuanians | 0.026 | 0.002 | 11.7 | 356502 |
| MbutiPygmy | Kostenki | Chamar                     | Lithuanians | 0.033 | 0.003 | 12.6 | 358148 |
| MbutiPygmy | Kostenki | Dharkars                   | Lithuanians | 0.030 | 0.002 | 12.2 | 358383 |
| MbutiPygmy | Kostenki | Dusadh                     | Lithuanians | 0.032 | 0.003 | 11.6 | 356551 |
| MbutiPygmy | Kostenki | Kanjars                    | Lithuanians | 0.032 | 0.003 | 12.7 | 356042 |
| MbutiPygmy | Kostenki | Kurmi                      | Lithuanians | 0.023 | 0.004 | 5.4  | 342529 |
| MbutiPygmy | Kostenki | Kol                        | Lithuanians | 0.032 | 0.002 | 13.3 | 361138 |
| MbutiPygmy | Kostenki | Kshatriya                  | Lithuanians | 0.026 | 0.002 | 11.3 | 355836 |
| MbutiPygmy | Kostenki | Meena                      | Lithuanians | 0.028 | 0.004 | 6.8  | 341479 |
| MbutiPygmy | Kostenki | Meghawal                   | Lithuanians | 0.032 | 0.004 | 7.4  | 341949 |
| MbutiPygmy | Kostenki | Muslim                     | Lithuanians | 0.032 | 0.003 | 12.1 | 353466 |
| MbutiPygmy | Kostenki | Tharus                     | Lithuanians | 0.031 | 0.003 | 9.0  | 346498 |
| MbutiPygmy | Kostenki | UttarPradeshScheduledCaste | Lithuanians | 0.035 | 0.003 | 11.3 | 349571 |
| MbutiPygmy | Kostenki | BrahminsTamilNadu          | Lithuanians | 0.029 | 0.003 | 9.0  | 346282 |
| MbutiPygmy | Kostenki | Chenchus                   | Lithuanians | 0.035 | 0.003 | 12.1 | 351567 |
| MbutiPygmy | Kostenki | Dhurwa                     | Lithuanians | 0.040 | 0.004 | 9.4  | 343440 |
| MbutiPygmy | Kostenki | Gond                       | Lithuanians | 0.035 | 0.003 | 11.6 | 352138 |
| MbutiPygmy | Kostenki | Hakkipikki                 | Lithuanians | 0.036 | 0.003 | 11.7 | 351453 |
| MbutiPygmy | Kostenki | NorthKannadi               | Lithuanians | 0.038 | 0.003 | 14.9 | 356844 |
| MbutiPygmy | Kostenki | Kurumba                    | Lithuanians | 0.034 | 0.003 | 11.2 | 350954 |
| MbutiPygmy | Kostenki | Lambadi                    | Lithuanians | 0.036 | 0.004 | 8.8  | 342283 |
| MbutiPygmy | Kostenki | Malayan                    | Lithuanians | 0.042 | 0.004 | 11.9 | 347312 |
| MbutiPygmy | Kostenki | Paniya                     | Lithuanians | 0.042 | 0.003 | 12.7 | 351634 |
| MbutiPygmy | Kostenki | PiramalaiKallars           | Lithuanians | 0.036 | 0.003 | 13.0 | 356247 |
| MbutiPygmy | Kostenki | Pulliyar                   | Lithuanians | 0.039 | 0.003 | 12.0 | 351505 |
| MbutiPygmy | Kostenki | Sakilli                    | Lithuanians | 0.040 | 0.003 | 12.9 | 351439 |
| MbutiPygmy | Kostenki | TamilNaduScheduledCaste    | Lithuanians | 0.032 | 0.003 | 9.7  | 346929 |
| MbutiPygmy | Kostenki | Velamas                    | Lithuanians | 0.035 | 0.002 | 14.1 | 357589 |
| MbutiPygmy | Kostenki | Asur                       | Lithuanians | 0.040 | 0.004 | 10.8 | 347577 |
| MbutiPygmy | Kostenki | Bonda                      | Lithuanians | 0.043 | 0.003 | 12.7 | 352230 |
| MbutiPygmy | Kostenki | Gadaba                     | Lithuanians | 0.043 | 0.004 | 10.2 | 343653 |
| MbutiPygmy | Kostenki | Ho                         | Lithuanians | 0.041 | 0.003 | 12.8 | 354336 |
| MbutiPygmy | Kostenki | Juang                      | Lithuanians | 0.044 | 0.004 | 11.6 | 348024 |
| MbutiPygmy | Kostenki | Kharia                     | Lithuanians | 0.041 | 0.004 | 10.9 | 347917 |
| MbutiPygmy | Kostenki | Khasi                      | Lithuanians | 0.038 | 0.003 | 11.4 | 350638 |
| MbutiPygmy | Kostenki | Mawasi                     | Lithuanians | 0.037 | 0.004 | 9.1  | 343209 |
| MbutiPygmy | Kostenki | Santhal                    | Lithuanians | 0.040 | 0.004 | 9.7  | 343460 |

|            |          |                  |             |       |       |      |        |
|------------|----------|------------------|-------------|-------|-------|------|--------|
| MbutiPygmy | Kostenki | Savara           | Lithuanians | 0.038 | 0.004 | 10.8 | 347781 |
| MbutiPygmy | Kostenki | Nihali           | Lithuanians | 0.037 | 0.004 | 10.5 | 347543 |
| MbutiPygmy | Kostenki | Garro            | Lithuanians | 0.043 | 0.004 | 12.0 | 352544 |
| MbutiPygmy | Kostenki | Naga             | Lithuanians | 0.042 | 0.004 | 11.6 | 351954 |
| MbutiPygmy | Kostenki | IndianJews       | Lithuanians | 0.031 | 0.002 | 13.0 | 356340 |
| MbutiPygmy | Kostenki | Burmese          | Lithuanians | 0.040 | 0.003 | 13.2 | 360473 |
| MbutiPygmy | Kostenki | Cambodian        | Lithuanians | 0.041 | 0.003 | 12.6 | 357960 |
| MbutiPygmy | Kostenki | Dai              | Lithuanians | 0.040 | 0.003 | 11.6 | 356965 |
| MbutiPygmy | Kostenki | Han              | Lithuanians | 0.040 | 0.003 | 12.1 | 360719 |
| MbutiPygmy | Kostenki | Han-NChina       | Lithuanians | 0.039 | 0.003 | 11.3 | 357277 |
| MbutiPygmy | Kostenki | Lahu             | Lithuanians | 0.043 | 0.004 | 12.0 | 355253 |
| MbutiPygmy | Kostenki | Miao             | Lithuanians | 0.039 | 0.003 | 11.3 | 356843 |
| MbutiPygmy | Kostenki | Naxi             | Lithuanians | 0.041 | 0.003 | 12.3 | 355967 |
| MbutiPygmy | Kostenki | She              | Lithuanians | 0.040 | 0.004 | 11.2 | 356395 |
| MbutiPygmy | Kostenki | Tujia            | Lithuanians | 0.040 | 0.003 | 11.7 | 357262 |
| MbutiPygmy | Kostenki | Yi               | Lithuanians | 0.039 | 0.003 | 11.4 | 357245 |
| MbutiPygmy | Kostenki | Japanese         | Lithuanians | 0.039 | 0.003 | 11.8 | 360026 |
| MbutiPygmy | Kostenki | Daur             | Lithuanians | 0.038 | 0.003 | 11.5 | 356631 |
| MbutiPygmy | Kostenki | Hezhen           | Lithuanians | 0.039 | 0.003 | 11.4 | 355808 |
| MbutiPygmy | Kostenki | Oroqen           | Lithuanians | 0.035 | 0.003 | 10.6 | 356246 |
| MbutiPygmy | Kostenki | Tu               | Lithuanians | 0.039 | 0.003 | 11.9 | 357859 |
| MbutiPygmy | Kostenki | Xibo             | Lithuanians | 0.037 | 0.003 | 11.3 | 356984 |
| MbutiPygmy | Kostenki | Mongola          | Lithuanians | 0.037 | 0.003 | 11.4 | 357520 |
| MbutiPygmy | Kostenki | Mongolians       | Lithuanians | 0.030 | 0.003 | 10.5 | 357174 |
| MbutiPygmy | Kostenki | Altaians         | Lithuanians | 0.027 | 0.003 | 10.7 | 360439 |
| MbutiPygmy | Kostenki | Buryats          | Lithuanians | 0.032 | 0.003 | 10.8 | 359419 |
| MbutiPygmy | Kostenki | Dolgans          | Lithuanians | 0.028 | 0.003 | 9.9  | 356555 |
| MbutiPygmy | Kostenki | Kets             | Lithuanians | 0.021 | 0.003 | 6.8  | 349915 |
| MbutiPygmy | Kostenki | Khakases         | Lithuanians | 0.023 | 0.002 | 9.9  | 360383 |
| MbutiPygmy | Kostenki | Nganassans       | Lithuanians | 0.030 | 0.003 | 9.5  | 356017 |
| MbutiPygmy | Kostenki | Selkups          | Lithuanians | 0.019 | 0.002 | 7.7  | 358335 |
| MbutiPygmy | Kostenki | Shors            | Lithuanians | 0.023 | 0.003 | 7.7  | 350789 |
| MbutiPygmy | Kostenki | Tuvinians        | Lithuanians | 0.032 | 0.003 | 11.0 | 359116 |
| MbutiPygmy | Kostenki | Nivkhs           | Lithuanians | 0.032 | 0.003 | 9.7  | 349377 |
| MbutiPygmy | Kostenki | Yakut            | Lithuanians | 0.031 | 0.003 | 10.9 | 360251 |
| MbutiPygmy | Kostenki | Evenkis          | Lithuanians | 0.031 | 0.003 | 10.4 | 357851 |
| MbutiPygmy | Kostenki | Evens            | Lithuanians | 0.034 | 0.003 | 10.1 | 354634 |
| MbutiPygmy | Kostenki | Yukaghirs        | Lithuanians | 0.024 | 0.003 | 8.8  | 354862 |
| MbutiPygmy | Kostenki | Koryaks          | Lithuanians | 0.025 | 0.003 | 7.6  | 356354 |
| MbutiPygmy | Kostenki | Chukchis         | Lithuanians | 0.025 | 0.003 | 8.5  | 356700 |
| MbutiPygmy | Kostenki | EastGreenlanders | Lithuanians | 0.021 | 0.003 | 7.0  | 353691 |

|            |          |                  |             |       |       |      |        |
|------------|----------|------------------|-------------|-------|-------|------|--------|
| MbutiPygmy | Kostenki | WestGreenlanders | Lithuanians | 0.017 | 0.003 | 6.3  | 354838 |
| MbutiPygmy | Kostenki | Maya             | Lithuanians | 0.024 | 0.003 | 7.2  | 358417 |
| MbutiPygmy | Kostenki | Pima             | Lithuanians | 0.021 | 0.004 | 5.5  | 351227 |
| MbutiPygmy | Kostenki | Colombian        | Lithuanians | 0.023 | 0.004 | 6.3  | 350250 |
| MbutiPygmy | Kostenki | Karitiana        | Lithuanians | 0.017 | 0.004 | 4.4  | 349416 |
| MbutiPygmy | Kostenki | Surui            | Lithuanians | 0.020 | 0.004 | 4.9  | 347408 |
| MbutiPygmy | Kostenki | Melanesian       | Lithuanians | 0.050 | 0.004 | 11.7 | 353923 |
| MbutiPygmy | Kostenki | Papuan           | Lithuanians | 0.054 | 0.004 | 12.6 | 353787 |



**Table S8.**

$D$ -statistics for  $D(\text{Outgroup}, K14)(X, \text{French})$ . Positive values indicate K14 closer to French. Altai Neanderthal whole modern genomes.

| p1         | p2       | p3         | p4     | D     | sdJK  | Z    | nSites  |
|------------|----------|------------|--------|-------|-------|------|---------|
| MbutiPygmy | Kostenki | San        | French | 0.393 | 0.005 | 77.1 | 1172844 |
| MbutiPygmy | Kostenki | Mandenka   | French | 0.329 | 0.005 | 64.2 | 1145123 |
| MbutiPygmy | Kostenki | Yoruba     | French | 0.335 | 0.005 | 63.5 | 1155436 |
| MbutiPygmy | Kostenki | Dinka      | French | 0.321 | 0.005 | 62.1 | 1145195 |
| MbutiPygmy | Kostenki | Sardinian  | French | 0.013 | 0.006 | 2.1  | 933558  |
| MbutiPygmy | Kostenki | Han        | French | 0.047 | 0.006 | 7.4  | 970333  |
| MbutiPygmy | Kostenki | Dai        | French | 0.044 | 0.006 | 7.0  | 969931  |
| MbutiPygmy | Kostenki | Mixe       | French | 0.029 | 0.006 | 4.6  | 938306  |
| MbutiPygmy | Kostenki | Karitiana  | French | 0.022 | 0.006 | 3.4  | 927792  |
| MbutiPygmy | Kostenki | Papuan     | French | 0.058 | 0.007 | 8.5  | 953359  |
| MbutiPygmy | Kostenki | Australian | French | 0.056 | 0.006 | 8.6  | 1111101 |

**Table S9.**

*D*-statistics for  $D(\text{Outgroup}, \text{Kostenki})(X, \text{French})$ . Positive values indicate K14 closer to French. Mal'ta paper whole modern genomes.

| p1         | p2       | p3        | p4     | D     | sdJK  | Z    | nSites |
|------------|----------|-----------|--------|-------|-------|------|--------|
| MbutiPygmy | Kostenki | San       | French | 0.401 | 0.005 | 82.9 | 779767 |
| MbutiPygmy | Kostenki | Mandenka  | French | 0.327 | 0.005 | 64.4 | 752632 |
| MbutiPygmy | Kostenki | Yoruba    | French | 0.334 | 0.005 | 66.4 | 763508 |
| MbutiPygmy | Kostenki | Dinka     | French | 0.309 | 0.005 | 59.0 | 759085 |
| MbutiPygmy | Kostenki | Sardinian | French | 0.008 | 0.006 | 1.4  | 615515 |
| MbutiPygmy | Kostenki | Mari      | French | 0.010 | 0.006 | 1.6  | 132268 |
| MbutiPygmy | Kostenki | Avar      | French | 0.013 | 0.006 | 2.2  | 330182 |
| MbutiPygmy | Kostenki | Tajik     | French | 0.010 | 0.006 | 1.7  | 473285 |
| MbutiPygmy | Kostenki | Indian    | French | 0.030 | 0.006 | 5.1  | 431881 |
| MbutiPygmy | Kostenki | Han       | French | 0.043 | 0.006 | 7.0  | 647947 |
| MbutiPygmy | Kostenki | Dai       | French | 0.042 | 0.006 | 7.1  | 648360 |
| MbutiPygmy | Kostenki | Karitiana | French | 0.009 | 0.006 | 1.4  | 614932 |
| MbutiPygmy | Kostenki | Papuan    | French | 0.051 | 0.007 | 7.8  | 632657 |

**Table S10:**

*D*-statistics for *D*(Mbuti,Modern)(Ancient, K14); modern genomes from Prufer et al. (2014).

| p1         | p2        | p3        | p4       | D      | sdJK  | Z     | nSites |
|------------|-----------|-----------|----------|--------|-------|-------|--------|
| MbutiPygmy | San       | MA1       | Kostenki | -0.005 | 0.006 | -0.8  | 115571 |
| MbutiPygmy | San       | Loschbour | Kostenki | -0.010 | 0.006 | -1.8  | 166027 |
| MbutiPygmy | San       | Brana     | Kostenki | 0.000  | 0.006 | 0.1   | 120369 |
| MbutiPygmy | San       | Motala    | Kostenki | 0.000  | 0.006 | -0.1  | 152012 |
| MbutiPygmy | San       | Ajv58     | Kostenki | -0.007 | 0.006 | -1.1  | 147098 |
| MbutiPygmy | San       | Gok2      | Kostenki | -0.002 | 0.005 | -0.4  | 98711  |
| MbutiPygmy | San       | Iceman    | Kostenki | -0.005 | 0.006 | -0.8  | 158243 |
| MbutiPygmy | San       | Stuttgart | Kostenki | 0.000  | 0.005 | 0.0   | 171993 |
| MbutiPygmy | Mandenka  | MA1       | Kostenki | -0.010 | 0.006 | -1.6  | 123458 |
| MbutiPygmy | Mandenka  | Loschbour | Kostenki | -0.026 | 0.006 | -4.7  | 177809 |
| MbutiPygmy | Mandenka  | Brana     | Kostenki | -0.009 | 0.005 | -1.8  | 129212 |
| MbutiPygmy | Mandenka  | Motala    | Kostenki | -0.012 | 0.005 | -2.2  | 163097 |
| MbutiPygmy | Mandenka  | Ajv58     | Kostenki | -0.016 | 0.006 | -2.8  | 158226 |
| MbutiPygmy | Mandenka  | Gok2      | Kostenki | -0.015 | 0.005 | -2.7  | 106163 |
| MbutiPygmy | Mandenka  | Iceman    | Kostenki | -0.026 | 0.005 | -4.8  | 170566 |
| MbutiPygmy | Mandenka  | Stuttgart | Kostenki | -0.017 | 0.005 | -3.2  | 184602 |
| MbutiPygmy | Yoruba    | MA1       | Kostenki | -0.010 | 0.006 | -1.8  | 123626 |
| MbutiPygmy | Yoruba    | Loschbour | Kostenki | -0.019 | 0.006 | -3.4  | 177200 |
| MbutiPygmy | Yoruba    | Brana     | Kostenki | -0.006 | 0.006 | -1.1  | 128420 |
| MbutiPygmy | Yoruba    | Motala    | Kostenki | -0.007 | 0.005 | -1.3  | 162582 |
| MbutiPygmy | Yoruba    | Ajv58     | Kostenki | -0.014 | 0.006 | -2.4  | 157238 |
| MbutiPygmy | Yoruba    | Gok2      | Kostenki | -0.008 | 0.006 | -1.5  | 105653 |
| MbutiPygmy | Yoruba    | Iceman    | Kostenki | -0.018 | 0.005 | -3.3  | 169431 |
| MbutiPygmy | Yoruba    | Stuttgart | Kostenki | -0.013 | 0.005 | -2.4  | 182961 |
| MbutiPygmy | Dinka     | MA1       | Kostenki | -0.009 | 0.006 | -1.6  | 123931 |
| MbutiPygmy | Dinka     | Loschbour | Kostenki | -0.017 | 0.006 | -2.8  | 177487 |
| MbutiPygmy | Dinka     | Brana     | Kostenki | -0.008 | 0.006 | -1.4  | 128916 |
| MbutiPygmy | Dinka     | Motala    | Kostenki | -0.001 | 0.006 | -0.1  | 163195 |
| MbutiPygmy | Dinka     | Ajv58     | Kostenki | -0.012 | 0.006 | -2.0  | 158204 |
| MbutiPygmy | Dinka     | Gok2      | Kostenki | -0.020 | 0.006 | -3.6  | 106048 |
| MbutiPygmy | Dinka     | Iceman    | Kostenki | -0.013 | 0.006 | -2.4  | 170270 |
| MbutiPygmy | Dinka     | Stuttgart | Kostenki | -0.012 | 0.006 | -2.1  | 184627 |
| MbutiPygmy | Sardinian | MA1       | Kostenki | -0.012 | 0.007 | -1.8  | 143868 |
| MbutiPygmy | Sardinian | Loschbour | Kostenki | -0.085 | 0.007 | -12.8 | 209554 |

|            |           |           |          |        |       |       |        |
|------------|-----------|-----------|----------|--------|-------|-------|--------|
| MbutiPygmy | Sardinian | Brana     | Kostenki | -0.062 | 0.007 | -9.4  | 151515 |
| MbutiPygmy | Sardinian | Motala    | Kostenki | -0.067 | 0.007 | -9.9  | 192016 |
| MbutiPygmy | Sardinian | Ajv58     | Kostenki | -0.069 | 0.007 | -10.5 | 186194 |
| MbutiPygmy | Sardinian | Gok2      | Kostenki | -0.098 | 0.007 | -14.9 | 125867 |
| MbutiPygmy | Sardinian | Iceman    | Kostenki | -0.083 | 0.006 | -13.3 | 201173 |
| MbutiPygmy | Sardinian | Stuttgart | Kostenki | -0.095 | 0.007 | -13.8 | 219017 |
| MbutiPygmy | French    | MA1       | Kostenki | -0.038 | 0.007 | -5.3  | 147012 |
| MbutiPygmy | French    | Loschbour | Kostenki | -0.094 | 0.006 | -14.9 | 213063 |
| MbutiPygmy | French    | Brana     | Kostenki | -0.080 | 0.006 | -13.2 | 154192 |
| MbutiPygmy | French    | Motala    | Kostenki | -0.085 | 0.007 | -12.4 | 196072 |
| MbutiPygmy | French    | Ajv58     | Kostenki | -0.086 | 0.007 | -12.6 | 189049 |
| MbutiPygmy | French    | Gok2      | Kostenki | -0.077 | 0.006 | -12.0 | 126985 |
| MbutiPygmy | French    | Iceman    | Kostenki | -0.074 | 0.006 | -12.3 | 203734 |
| MbutiPygmy | French    | Stuttgart | Kostenki | -0.069 | 0.007 | -10.4 | 220632 |
| MbutiPygmy | Han       | MA1       | Kostenki | -0.039 | 0.007 | -5.4  | 140727 |
| MbutiPygmy | Han       | Loschbour | Kostenki | -0.039 | 0.007 | -5.3  | 201566 |
| MbutiPygmy | Han       | Brana     | Kostenki | -0.024 | 0.007 | -3.5  | 146036 |
| MbutiPygmy | Han       | Motala    | Kostenki | -0.026 | 0.007 | -4.0  | 185194 |
| MbutiPygmy | Han       | Ajv58     | Kostenki | -0.026 | 0.007 | -3.7  | 179068 |
| MbutiPygmy | Han       | Gok2      | Kostenki | -0.013 | 0.007 | -1.9  | 119918 |
| MbutiPygmy | Han       | Iceman    | Kostenki | -0.004 | 0.006 | -0.6  | 192304 |
| MbutiPygmy | Han       | Stuttgart | Kostenki | 0.000  | 0.007 | 0.0   | 208439 |
| MbutiPygmy | Dai       | MA1       | Kostenki | -0.038 | 0.007 | -5.5  | 141382 |
| MbutiPygmy | Dai       | Loschbour | Kostenki | -0.023 | 0.007 | -3.1  | 202056 |
| MbutiPygmy | Dai       | Brana     | Kostenki | -0.013 | 0.007 | -1.9  | 146239 |
| MbutiPygmy | Dai       | Motala    | Kostenki | -0.018 | 0.007 | -2.6  | 185346 |
| MbutiPygmy | Dai       | Ajv58     | Kostenki | -0.021 | 0.007 | -3.1  | 179385 |
| MbutiPygmy | Dai       | Gok2      | Kostenki | -0.009 | 0.007 | -1.4  | 119918 |
| MbutiPygmy | Dai       | Iceman    | Kostenki | -0.001 | 0.007 | -0.1  | 191885 |
| MbutiPygmy | Dai       | Stuttgart | Kostenki | -0.001 | 0.007 | -0.1  | 208671 |
| MbutiPygmy | Mixe      | MA1       | Kostenki | -0.091 | 0.007 | -12.7 | 140768 |
| MbutiPygmy | Mixe      | Loschbour | Kostenki | -0.028 | 0.007 | -4.1  | 197906 |
| MbutiPygmy | Mixe      | Brana     | Kostenki | -0.025 | 0.007 | -3.6  | 143467 |
| MbutiPygmy | Mixe      | Motala    | Kostenki | -0.048 | 0.007 | -7.0  | 183071 |
| MbutiPygmy | Mixe      | Ajv58     | Kostenki | -0.045 | 0.007 | -6.5  | 176551 |
| MbutiPygmy | Mixe      | Gok2      | Kostenki | -0.001 | 0.007 | -0.2  | 117501 |
| MbutiPygmy | Mixe      | Iceman    | Kostenki | 0.001  | 0.007 | 0.1   | 188825 |
| MbutiPygmy | Mixe      | Stuttgart | Kostenki | 0.003  | 0.007 | 0.4   | 204608 |
| MbutiPygmy | Karitiana | MA1       | Kostenki | -0.086 | 0.008 | -11.2 | 138927 |

|            |            |           |          |        |       |      |        |
|------------|------------|-----------|----------|--------|-------|------|--------|
| MbutiPygmy | Karitiana  | Loschbour | Kostenki | -0.027 | 0.007 | -3.8 | 195802 |
| MbutiPygmy | Karitiana  | Brana     | Kostenki | -0.023 | 0.007 | -3.4 | 142149 |
| MbutiPygmy | Karitiana  | Motala    | Kostenki | -0.047 | 0.007 | -6.6 | 181158 |
| MbutiPygmy | Karitiana  | Ajv58     | Kostenki | -0.035 | 0.007 | -4.8 | 174452 |
| MbutiPygmy | Karitiana  | Gok2      | Kostenki | -0.001 | 0.007 | -0.2 | 116412 |
| MbutiPygmy | Karitiana  | Iceman    | Kostenki | 0.006  | 0.007 | 0.8  | 186439 |
| MbutiPygmy | Karitiana  | Stuttgart | Kostenki | 0.009  | 0.007 | 1.3  | 201830 |
| MbutiPygmy | Papuan     | MA1       | Kostenki | -0.022 | 0.007 | -3.0 | 134960 |
| MbutiPygmy | Papuan     | Loschbour | Kostenki | -0.016 | 0.007 | -2.2 | 193181 |
| MbutiPygmy | Papuan     | Brana     | Kostenki | -0.003 | 0.007 | -0.4 | 139878 |
| MbutiPygmy | Papuan     | Motala    | Kostenki | -0.012 | 0.007 | -1.7 | 177496 |
| MbutiPygmy | Papuan     | Ajv58     | Kostenki | -0.006 | 0.007 | -0.8 | 171333 |
| MbutiPygmy | Papuan     | Gok2      | Kostenki | 0.002  | 0.007 | 0.2  | 114673 |
| MbutiPygmy | Papuan     | Iceman    | Kostenki | 0.008  | 0.007 | 1.2  | 184011 |
| MbutiPygmy | Papuan     | Stuttgart | Kostenki | 0.006  | 0.007 | 0.9  | 199951 |
| MbutiPygmy | Australian | MA1       | Kostenki | -0.023 | 0.007 | -3.3 | 158792 |
| MbutiPygmy | Australian | Loschbour | Kostenki | -0.014 | 0.007 | -2.0 | 226708 |
| MbutiPygmy | Australian | Brana     | Kostenki | -0.007 | 0.007 | -1.1 | 164499 |
| MbutiPygmy | Australian | Motala    | Kostenki | -0.010 | 0.007 | -1.5 | 208593 |
| MbutiPygmy | Australian | Ajv58     | Kostenki | -0.008 | 0.007 | -1.2 | 201471 |
| MbutiPygmy | Australian | Gok2      | Kostenki | 0.003  | 0.007 | 0.5  | 134531 |
| MbutiPygmy | Australian | Iceman    | Kostenki | 0.007  | 0.006 | 1.2  | 215625 |
| MbutiPygmy | Australian | Stuttgart | Kostenki | 0.013  | 0.007 | 1.9  | 234191 |

**Table S11.**

*D*-statistics for *D*(Mbuti,Modern)(Ancient, K14); modern genomes from Raghavan et al. (2014).

| p1         | p2        | p3        | p4       | D      | sdJK  | Z     | nSites |
|------------|-----------|-----------|----------|--------|-------|-------|--------|
| MbutiPygmy | San       | MA1       | Kostenki | -0.003 | 0.006 | -0.6  | 78821  |
| MbutiPygmy | San       | Loschbour | Kostenki | -0.004 | 0.006 | -0.7  | 112712 |
| MbutiPygmy | San       | Brana     | Kostenki | 0.000  | 0.006 | 0.0   | 80913  |
| MbutiPygmy | San       | Motala    | Kostenki | 0.000  | 0.006 | 0.1   | 103026 |
| MbutiPygmy | San       | Ajv58     | Kostenki | -0.008 | 0.006 | -1.3  | 100277 |
| MbutiPygmy | San       | Gok2      | Kostenki | -0.006 | 0.006 | -1.0  | 65522  |
| MbutiPygmy | San       | Iceman    | Kostenki | 0.002  | 0.006 | 0.3   | 106426 |
| MbutiPygmy | San       | Stuttgart | Kostenki | -0.001 | 0.006 | -0.2  | 116437 |
| MbutiPygmy | Mandenka  | MA1       | Kostenki | 0.008  | 0.006 | 1.4   | 83168  |
| MbutiPygmy | Mandenka  | Loschbour | Kostenki | -0.004 | 0.006 | -0.6  | 118675 |
| MbutiPygmy | Mandenka  | Brana     | Kostenki | -0.002 | 0.006 | -0.3  | 85199  |
| MbutiPygmy | Mandenka  | Motala    | Kostenki | 0.001  | 0.006 | 0.2   | 108818 |
| MbutiPygmy | Mandenka  | Ajv58     | Kostenki | -0.003 | 0.006 | -0.5  | 105677 |
| MbutiPygmy | Mandenka  | Gok2      | Kostenki | -0.006 | 0.006 | -1.0  | 69105  |
| MbutiPygmy | Mandenka  | Iceman    | Kostenki | 0.006  | 0.005 | 1.1   | 112405 |
| MbutiPygmy | Mandenka  | Stuttgart | Kostenki | -0.007 | 0.006 | -1.3  | 123312 |
| MbutiPygmy | Yoruba    | MA1       | Kostenki | 0.002  | 0.006 | 0.3   | 83661  |
| MbutiPygmy | Yoruba    | Loschbour | Kostenki | -0.010 | 0.006 | -1.7  | 119761 |
| MbutiPygmy | Yoruba    | Brana     | Kostenki | -0.010 | 0.006 | -1.8  | 85981  |
| MbutiPygmy | Yoruba    | Motala    | Kostenki | 0.001  | 0.006 | 0.2   | 109603 |
| MbutiPygmy | Yoruba    | Ajv58     | Kostenki | -0.015 | 0.006 | -2.5  | 106470 |
| MbutiPygmy | Yoruba    | Gok2      | Kostenki | -0.006 | 0.006 | -1.1  | 69744  |
| MbutiPygmy | Yoruba    | Iceman    | Kostenki | -0.001 | 0.006 | -0.2  | 113172 |
| MbutiPygmy | Yoruba    | Stuttgart | Kostenki | -0.010 | 0.006 | -1.7  | 124127 |
| MbutiPygmy | Dinka     | MA1       | Kostenki | 0.003  | 0.006 | 0.5   | 85002  |
| MbutiPygmy | Dinka     | Loschbour | Kostenki | -0.004 | 0.006 | -0.6  | 122003 |
| MbutiPygmy | Dinka     | Brana     | Kostenki | 0.001  | 0.006 | 0.1   | 87082  |
| MbutiPygmy | Dinka     | Motala    | Kostenki | -0.003 | 0.006 | -0.4  | 111675 |
| MbutiPygmy | Dinka     | Ajv58     | Kostenki | -0.009 | 0.006 | -1.4  | 108309 |
| MbutiPygmy | Dinka     | Gok2      | Kostenki | -0.003 | 0.006 | -0.4  | 70654  |
| MbutiPygmy | Dinka     | Iceman    | Kostenki | -0.003 | 0.006 | -0.5  | 115579 |
| MbutiPygmy | Dinka     | Stuttgart | Kostenki | -0.003 | 0.006 | -0.5  | 126353 |
| MbutiPygmy | Sardinian | MA1       | Kostenki | -0.012 | 0.007 | -1.7  | 97338  |
| MbutiPygmy | Sardinian | Loschbour | Kostenki | -0.083 | 0.007 | -11.9 | 141445 |
| MbutiPygmy | Sardinian | Brana     | Kostenki | -0.064 | 0.007 | -9.4  | 100800 |

|            |           |           |          |        |       |       |        |
|------------|-----------|-----------|----------|--------|-------|-------|--------|
| MbutiPygmy | Sardinian | Motala    | Kostenki | -0.057 | 0.007 | -8.0  | 129081 |
| MbutiPygmy | Sardinian | Ajv58     | Kostenki | -0.070 | 0.007 | -9.8  | 125246 |
| MbutiPygmy | Sardinian | Gok2      | Kostenki | -0.095 | 0.006 | -14.7 | 82341  |
| MbutiPygmy | Sardinian | Iceman    | Kostenki | -0.078 | 0.007 | -11.2 | 134599 |
| MbutiPygmy | Sardinian | Stuttgart | Kostenki | -0.094 | 0.007 | -13.7 | 147353 |
| MbutiPygmy | French    | MA1       | Kostenki | -0.022 | 0.007 | -3.1  | 99145  |
| MbutiPygmy | French    | Loschbour | Kostenki | -0.090 | 0.007 | -13.2 | 143888 |
| MbutiPygmy | French    | Brana     | Kostenki | -0.072 | 0.007 | -10.3 | 102409 |
| MbutiPygmy | French    | Motala    | Kostenki | -0.079 | 0.007 | -11.6 | 131688 |
| MbutiPygmy | French    | Ajv58     | Kostenki | -0.080 | 0.007 | -11.8 | 127610 |
| MbutiPygmy | French    | Gok2      | Kostenki | -0.082 | 0.007 | -12.4 | 83617  |
| MbutiPygmy | French    | Iceman    | Kostenki | -0.065 | 0.007 | -9.4  | 136163 |
| MbutiPygmy | French    | Stuttgart | Kostenki | -0.069 | 0.007 | -10.2 | 148652 |
| MbutiPygmy | Mari      | MA1       | Kostenki | -0.043 | 0.010 | -4.3  | 20424  |
| MbutiPygmy | Mari      | Loschbour | Kostenki | -0.068 | 0.009 | -7.6  | 27386  |
| MbutiPygmy | Mari      | Brana     | Kostenki | -0.050 | 0.009 | -5.6  | 24704  |
| MbutiPygmy | Mari      | Motala    | Kostenki | -0.072 | 0.009 | -8.0  | 25429  |
| MbutiPygmy | Mari      | Ajv58     | Kostenki | -0.063 | 0.009 | -7.4  | 24378  |
| MbutiPygmy | Mari      | Gok2      | Kostenki | -0.053 | 0.009 | -5.9  | 23349  |
| MbutiPygmy | Mari      | Iceman    | Kostenki | -0.028 | 0.009 | -3.2  | 26575  |
| MbutiPygmy | Mari      | Stuttgart | Kostenki | -0.040 | 0.009 | -4.6  | 28437  |
| MbutiPygmy | Avar      | MA1       | Kostenki | -0.038 | 0.007 | -5.4  | 52663  |
| MbutiPygmy | Avar      | Loschbour | Kostenki | -0.065 | 0.007 | -9.5  | 71055  |
| MbutiPygmy | Avar      | Brana     | Kostenki | -0.047 | 0.007 | -6.8  | 60196  |
| MbutiPygmy | Avar      | Motala    | Kostenki | -0.064 | 0.007 | -9.2  | 65910  |
| MbutiPygmy | Avar      | Ajv58     | Kostenki | -0.067 | 0.007 | -10.1 | 63967  |
| MbutiPygmy | Avar      | Gok2      | Kostenki | -0.062 | 0.007 | -9.4  | 56412  |
| MbutiPygmy | Avar      | Iceman    | Kostenki | -0.049 | 0.007 | -7.3  | 70373  |
| MbutiPygmy | Avar      | Stuttgart | Kostenki | -0.063 | 0.007 | -9.3  | 73683  |
| MbutiPygmy | Tajik     | MA1       | Kostenki | -0.040 | 0.007 | -5.8  | 75674  |
| MbutiPygmy | Tajik     | Loschbour | Kostenki | -0.049 | 0.007 | -7.1  | 103790 |
| MbutiPygmy | Tajik     | Brana     | Kostenki | -0.047 | 0.007 | -6.6  | 82476  |
| MbutiPygmy | Tajik     | Motala    | Kostenki | -0.055 | 0.007 | -7.8  | 95973  |
| MbutiPygmy | Tajik     | Ajv58     | Kostenki | -0.056 | 0.007 | -8.4  | 92676  |
| MbutiPygmy | Tajik     | Gok2      | Kostenki | -0.050 | 0.007 | -7.4  | 73103  |
| MbutiPygmy | Tajik     | Iceman    | Kostenki | -0.039 | 0.007 | -5.8  | 102026 |
| MbutiPygmy | Tajik     | Stuttgart | Kostenki | -0.048 | 0.007 | -7.3  | 107745 |
| MbutiPygmy | Indian    | MA1       | Kostenki | -0.034 | 0.007 | -4.8  | 67360  |
| MbutiPygmy | Indian    | Loschbour | Kostenki | -0.036 | 0.006 | -5.7  | 92518  |

|            |           |           |          |        |       |      |        |
|------------|-----------|-----------|----------|--------|-------|------|--------|
| MbutiPygmy | Indian    | Brana     | Kostenki | -0.026 | 0.007 | -3.7 | 72306  |
| MbutiPygmy | Indian    | Motala    | Kostenki | -0.030 | 0.007 | -4.3 | 85057  |
| MbutiPygmy | Indian    | Ajv58     | Kostenki | -0.034 | 0.007 | -4.9 | 82312  |
| MbutiPygmy | Indian    | Gok2      | Kostenki | -0.030 | 0.007 | -4.5 | 63444  |
| MbutiPygmy | Indian    | Iceman    | Kostenki | -0.017 | 0.007 | -2.5 | 89919  |
| MbutiPygmy | Indian    | Stuttgart | Kostenki | -0.022 | 0.007 | -3.2 | 95204  |
| MbutiPygmy | Han       | MA1       | Kostenki | -0.027 | 0.008 | -3.5 | 96432  |
| MbutiPygmy | Han       | Loschbour | Kostenki | -0.021 | 0.007 | -2.8 | 137766 |
| MbutiPygmy | Han       | Brana     | Kostenki | -0.015 | 0.007 | -2.1 | 98190  |
| MbutiPygmy | Han       | Motala    | Kostenki | -0.020 | 0.007 | -2.9 | 126212 |
| MbutiPygmy | Han       | Ajv58     | Kostenki | -0.019 | 0.007 | -2.7 | 122220 |
| MbutiPygmy | Han       | Gok2      | Kostenki | -0.007 | 0.007 | -0.9 | 79697  |
| MbutiPygmy | Han       | Iceman    | Kostenki | 0.015  | 0.007 | 2.1  | 129806 |
| MbutiPygmy | Han       | Stuttgart | Kostenki | 0.000  | 0.007 | 0.0  | 141874 |
| MbutiPygmy | Dai       | MA1       | Kostenki | -0.032 | 0.007 | -4.4 | 96628  |
| MbutiPygmy | Dai       | Loschbour | Kostenki | -0.017 | 0.007 | -2.3 | 137787 |
| MbutiPygmy | Dai       | Brana     | Kostenki | -0.017 | 0.007 | -2.4 | 98628  |
| MbutiPygmy | Dai       | Motala    | Kostenki | -0.014 | 0.007 | -2.0 | 126306 |
| MbutiPygmy | Dai       | Ajv58     | Kostenki | -0.017 | 0.007 | -2.4 | 122241 |
| MbutiPygmy | Dai       | Gok2      | Kostenki | -0.006 | 0.007 | -0.9 | 80226  |
| MbutiPygmy | Dai       | Iceman    | Kostenki | 0.015  | 0.007 | 2.2  | 130030 |
| MbutiPygmy | Dai       | Stuttgart | Kostenki | 0.003  | 0.007 | 0.5  | 142047 |
| MbutiPygmy | Karitiana | MA1       | Kostenki | -0.076 | 0.008 | -9.8 | 94637  |
| MbutiPygmy | Karitiana | Loschbour | Kostenki | -0.018 | 0.007 | -2.4 | 133143 |
| MbutiPygmy | Karitiana | Brana     | Kostenki | -0.015 | 0.007 | -2.1 | 95149  |
| MbutiPygmy | Karitiana | Motala    | Kostenki | -0.037 | 0.007 | -5.1 | 122668 |
| MbutiPygmy | Karitiana | Ajv58     | Kostenki | -0.032 | 0.007 | -4.6 | 118349 |
| MbutiPygmy | Karitiana | Gok2      | Kostenki | 0.006  | 0.007 | 0.8  | 76768  |
| MbutiPygmy | Karitiana | Iceman    | Kostenki | 0.022  | 0.007 | 3.0  | 125104 |
| MbutiPygmy | Karitiana | Stuttgart | Kostenki | 0.017  | 0.007 | 2.4  | 136584 |
| MbutiPygmy | Papuan    | MA1       | Kostenki | -0.010 | 0.008 | -1.3 | 92223  |
| MbutiPygmy | Papuan    | Loschbour | Kostenki | -0.005 | 0.008 | -0.6 | 131228 |
| MbutiPygmy | Papuan    | Brana     | Kostenki | 0.002  | 0.008 | 0.3  | 93872  |
| MbutiPygmy | Papuan    | Motala    | Kostenki | -0.008 | 0.007 | -1.1 | 120638 |
| MbutiPygmy | Papuan    | Ajv58     | Kostenki | 0.000  | 0.007 | 0.0  | 116730 |
| MbutiPygmy | Papuan    | Gok2      | Kostenki | 0.007  | 0.008 | 0.9  | 75952  |
| MbutiPygmy | Papuan    | Iceman    | Kostenki | 0.018  | 0.007 | 2.4  | 124203 |
| MbutiPygmy | Papuan    | Stuttgart | Kostenki | 0.014  | 0.008 | 1.9  | 135598 |



**Table S12.** $f_4$ -statistics  $f_4(\text{Sardinian, Ancient})(\text{Modern, Papuan})$  for Siberian populations.

| p1        | p2        | p3         | p4     | f4     | sdJK  | Z    | nSites |
|-----------|-----------|------------|--------|--------|-------|------|--------|
| Sardinian | Kostenki  | Altaians   | Papuan | 0.004  | 0.000 | 8.6  | 450206 |
| Sardinian | Kostenki  | Buryats    | Papuan | 0.002  | 0.000 | 5.3  | 450206 |
| Sardinian | Kostenki  | Dolgans    | Papuan | 0.003  | 0.000 | 6.4  | 450206 |
| Sardinian | Kostenki  | Kets       | Papuan | 0.003  | 0.000 | 6.1  | 450206 |
| Sardinian | Kostenki  | Khakases   | Papuan | 0.004  | 0.000 | 9.7  | 450206 |
| Sardinian | Kostenki  | Nganassans | Papuan | 0.002  | 0.000 | 4.8  | 450206 |
| Sardinian | Kostenki  | Selkups    | Papuan | 0.004  | 0.000 | 8.0  | 450206 |
| Sardinian | Kostenki  | Shors      | Papuan | 0.004  | 0.000 | 8.0  | 450206 |
| Sardinian | Kostenki  | Tuvinians  | Papuan | 0.003  | 0.000 | 5.8  | 450206 |
| Sardinian | Kostenki  | Nivkhs     | Papuan | 0.003  | 0.000 | 5.9  | 450206 |
| Sardinian | Kostenki  | Yakut      | Papuan | 0.002  | 0.000 | 5.2  | 450206 |
| Sardinian | Kostenki  | Evenkis    | Papuan | 0.002  | 0.000 | 5.1  | 450206 |
| Sardinian | Kostenki  | Evens      | Papuan | 0.001  | 0.000 | 3.1  | 450206 |
| Sardinian | Kostenki  | Yukaghirs  | Papuan | 0.005  | 0.000 | 9.9  | 450206 |
| Sardinian | Kostenki  | Koryaks    | Papuan | 0.002  | 0.000 | 4.2  | 450206 |
| Sardinian | Kostenki  | Chukchis   | Papuan | 0.003  | 0.000 | 5.9  | 450206 |
| Sardinian | MA1       | Altaians   | Papuan | 0.000  | 0.000 | 1.1  | 361684 |
| Sardinian | MA1       | Buryats    | Papuan | 0.000  | 0.000 | -0.5 | 361684 |
| Sardinian | MA1       | Dolgans    | Papuan | 0.000  | 0.000 | 0.3  | 361684 |
| Sardinian | MA1       | Kets       | Papuan | -0.003 | 0.000 | -5.1 | 361684 |
| Sardinian | MA1       | Khakases   | Papuan | 0.001  | 0.000 | 1.5  | 361684 |
| Sardinian | MA1       | Nganassans | Papuan | -0.002 | 0.000 | -3.7 | 361684 |
| Sardinian | MA1       | Selkups    | Papuan | -0.001 | 0.000 | -2.1 | 361684 |
| Sardinian | MA1       | Shors      | Papuan | -0.001 | 0.001 | -1.1 | 361684 |
| Sardinian | MA1       | Tuvinians  | Papuan | 0.000  | 0.000 | -1.2 | 361684 |
| Sardinian | MA1       | Nivkhs     | Papuan | 0.000  | 0.000 | 0.3  | 361684 |
| Sardinian | MA1       | Yakut      | Papuan | 0.000  | 0.000 | -0.7 | 361684 |
| Sardinian | MA1       | Evenkis    | Papuan | 0.000  | 0.000 | -1.0 | 361684 |
| Sardinian | MA1       | Evens      | Papuan | -0.002 | 0.000 | -3.6 | 361684 |
| Sardinian | MA1       | Yukaghirs  | Papuan | 0.002  | 0.000 | 3.9  | 361684 |
| Sardinian | MA1       | Koryaks    | Papuan | -0.003 | 0.000 | -5.6 | 361684 |
| Sardinian | MA1       | Chukchis   | Papuan | -0.002 | 0.000 | -5.4 | 361684 |
| Sardinian | Loschbour | Altaians   | Papuan | 0.000  | 0.000 | 0.3  | 513262 |
| Sardinian | Loschbour | Buryats    | Papuan | 0.000  | 0.000 | 0.7  | 513262 |
| Sardinian | Loschbour | Dolgans    | Papuan | 0.000  | 0.000 | -0.1 | 513262 |

|           |           |            |        |        |       |      |        |
|-----------|-----------|------------|--------|--------|-------|------|--------|
| Sardinian | Loschbour | Kets       | Papuan | -0.001 | 0.000 | -1.9 | 513262 |
| Sardinian | Loschbour | Khakases   | Papuan | 0.000  | 0.000 | 0.1  | 513262 |
| Sardinian | Loschbour | Nganassans | Papuan | -0.001 | 0.000 | -1.2 | 513262 |
| Sardinian | Loschbour | Selkups    | Papuan | -0.001 | 0.000 | -1.6 | 513262 |
| Sardinian | Loschbour | Shors      | Papuan | 0.000  | 0.000 | -0.6 | 513262 |
| Sardinian | Loschbour | Tuvinians  | Papuan | 0.000  | 0.000 | 0.9  | 513262 |
| Sardinian | Loschbour | Nivkhs     | Papuan | 0.000  | 0.000 | -0.4 | 513262 |
| Sardinian | Loschbour | Yakut      | Papuan | 0.000  | 0.000 | 0.6  | 513262 |
| Sardinian | Loschbour | Evenkis    | Papuan | 0.000  | 0.000 | -0.2 | 513262 |
| Sardinian | Loschbour | Evens      | Papuan | 0.000  | 0.000 | -0.4 | 513262 |
| Sardinian | Loschbour | Yukaghirs  | Papuan | 0.000  | 0.000 | -1.1 | 513262 |
| Sardinian | Loschbour | Koryaks    | Papuan | 0.000  | 0.000 | -0.8 | 513262 |
| Sardinian | Loschbour | Chukchis   | Papuan | -0.001 | 0.000 | -1.4 | 513262 |
| Sardinian | Brana     | Altaians   | Papuan | 0.000  | 0.000 | 1.1  | 382865 |
| Sardinian | Brana     | Buryats    | Papuan | 0.000  | 0.000 | 0.6  | 382865 |
| Sardinian | Brana     | Dolgans    | Papuan | 0.000  | 0.000 | 0.3  | 382865 |
| Sardinian | Brana     | Kets       | Papuan | -0.001 | 0.000 | -1.5 | 382865 |
| Sardinian | Brana     | Khakases   | Papuan | 0.000  | 0.000 | 0.3  | 382865 |
| Sardinian | Brana     | Nganassans | Papuan | 0.000  | 0.000 | -1.0 | 382865 |
| Sardinian | Brana     | Selkups    | Papuan | 0.000  | 0.000 | -1.0 | 382865 |
| Sardinian | Brana     | Shors      | Papuan | 0.000  | 0.000 | 0.0  | 382865 |
| Sardinian | Brana     | Tuvinians  | Papuan | 0.000  | 0.000 | 0.7  | 382865 |
| Sardinian | Brana     | Nivkhs     | Papuan | 0.000  | 0.000 | -0.6 | 382865 |
| Sardinian | Brana     | Yakut      | Papuan | 0.000  | 0.000 | 0.5  | 382865 |
| Sardinian | Brana     | Evenkis    | Papuan | 0.000  | 0.000 | 0.5  | 382865 |
| Sardinian | Brana     | Evens      | Papuan | -0.001 | 0.000 | -1.3 | 382865 |
| Sardinian | Brana     | Yukaghirs  | Papuan | 0.000  | 0.000 | 0.0  | 382865 |
| Sardinian | Brana     | Koryaks    | Papuan | -0.001 | 0.000 | -1.4 | 382865 |
| Sardinian | Brana     | Chukchis   | Papuan | 0.000  | 0.000 | -1.1 | 382865 |
| Sardinian | Motala    | Altaians   | Papuan | 0.000  | 0.000 | -1.4 | 465565 |
| Sardinian | Motala    | Buryats    | Papuan | 0.000  | 0.000 | 0.1  | 465565 |
| Sardinian | Motala    | Dolgans    | Papuan | 0.000  | 0.000 | -1.1 | 465565 |
| Sardinian | Motala    | Kets       | Papuan | -0.002 | 0.000 | -5.5 | 465565 |
| Sardinian | Motala    | Khakases   | Papuan | -0.001 | 0.000 | -2.1 | 465565 |
| Sardinian | Motala    | Nganassans | Papuan | -0.001 | 0.000 | -2.6 | 465565 |
| Sardinian | Motala    | Selkups    | Papuan | -0.002 | 0.000 | -4.7 | 465565 |
| Sardinian | Motala    | Shors      | Papuan | -0.001 | 0.000 | -3.5 | 465565 |
| Sardinian | Motala    | Tuvinians  | Papuan | 0.000  | 0.000 | -1.2 | 465565 |
| Sardinian | Motala    | Nivkhs     | Papuan | 0.000  | 0.000 | 0.1  | 465565 |

|           |        |            |        |        |       |      |        |
|-----------|--------|------------|--------|--------|-------|------|--------|
| Sardinian | Motala | Yakut      | Papuan | 0.000  | 0.000 | -0.7 | 465565 |
| Sardinian | Motala | Evenkis    | Papuan | 0.000  | 0.000 | -0.5 | 465565 |
| Sardinian | Motala | Evens      | Papuan | -0.001 | 0.000 | -1.7 | 465565 |
| Sardinian | Motala | Yukaghirs  | Papuan | 0.000  | 0.000 | -1.1 | 465565 |
| Sardinian | Motala | Koryaks    | Papuan | -0.001 | 0.000 | -3.2 | 465565 |
| Sardinian | Motala | Chukchis   | Papuan | -0.001 | 0.000 | -3.8 | 465565 |
| Sardinian | Ajv58  | Altaians   | Papuan | -0.001 | 0.000 | -2.8 | 460091 |
| Sardinian | Ajv58  | Buryats    | Papuan | -0.001 | 0.000 | -1.5 | 460091 |
| Sardinian | Ajv58  | Dolgans    | Papuan | -0.001 | 0.000 | -2.3 | 460091 |
| Sardinian | Ajv58  | Kets       | Papuan | -0.002 | 0.000 | -5.7 | 460091 |
| Sardinian | Ajv58  | Khakases   | Papuan | -0.001 | 0.000 | -2.7 | 460091 |
| Sardinian | Ajv58  | Nganassans | Papuan | -0.002 | 0.000 | -4.5 | 460091 |
| Sardinian | Ajv58  | Selkups    | Papuan | -0.002 | 0.000 | -5.2 | 460091 |
| Sardinian | Ajv58  | Shors      | Papuan | -0.001 | 0.000 | -3.0 | 460091 |
| Sardinian | Ajv58  | Tuvinians  | Papuan | -0.001 | 0.000 | -2.5 | 460091 |
| Sardinian | Ajv58  | Nivkhs     | Papuan | -0.001 | 0.000 | -1.7 | 460091 |
| Sardinian | Ajv58  | Yakut      | Papuan | -0.001 | 0.000 | -2.3 | 460091 |
| Sardinian | Ajv58  | Evenkis    | Papuan | -0.001 | 0.000 | -1.9 | 460091 |
| Sardinian | Ajv58  | Evens      | Papuan | -0.001 | 0.000 | -3.0 | 460091 |
| Sardinian | Ajv58  | Yukaghirs  | Papuan | -0.001 | 0.000 | -2.6 | 460091 |
| Sardinian | Ajv58  | Koryaks    | Papuan | -0.001 | 0.000 | -3.8 | 460091 |
| Sardinian | Ajv58  | Chukchis   | Papuan | -0.002 | 0.000 | -4.5 | 460091 |
| Sardinian | Gok2   | Altaians   | Papuan | 0.000  | 0.000 | 1.2  | 317281 |
| Sardinian | Gok2   | Buryats    | Papuan | 0.000  | 0.000 | 1.4  | 317281 |
| Sardinian | Gok2   | Dolgans    | Papuan | 0.000  | 0.000 | 0.9  | 317281 |
| Sardinian | Gok2   | Kets       | Papuan | 0.000  | 0.000 | 1.0  | 317281 |
| Sardinian | Gok2   | Khakases   | Papuan | 0.000  | 0.000 | 1.3  | 317281 |
| Sardinian | Gok2   | Nganassans | Papuan | 0.000  | 0.000 | 0.1  | 317281 |
| Sardinian | Gok2   | Selkups    | Papuan | 0.000  | 0.000 | 0.4  | 317281 |
| Sardinian | Gok2   | Shors      | Papuan | 0.000  | 0.000 | 1.2  | 317281 |
| Sardinian | Gok2   | Tuvinians  | Papuan | 0.000  | 0.000 | 1.2  | 317281 |
| Sardinian | Gok2   | Nivkhs     | Papuan | 0.000  | 0.000 | -0.1 | 317281 |
| Sardinian | Gok2   | Yakut      | Papuan | 0.000  | 0.000 | 1.3  | 317281 |
| Sardinian | Gok2   | Evenkis    | Papuan | 0.000  | 0.000 | 1.2  | 317281 |
| Sardinian | Gok2   | Evens      | Papuan | 0.000  | 0.000 | 1.2  | 317281 |
| Sardinian | Gok2   | Yukaghirs  | Papuan | 0.000  | 0.000 | 0.3  | 317281 |
| Sardinian | Gok2   | Koryaks    | Papuan | 0.000  | 0.000 | 1.3  | 317281 |
| Sardinian | Gok2   | Chukchis   | Papuan | 0.000  | 0.000 | 1.3  | 317281 |
| Sardinian | Iceman | Altaians   | Papuan | 0.001  | 0.000 | 2.1  | 495464 |

|           |           |            |        |       |       |     |        |
|-----------|-----------|------------|--------|-------|-------|-----|--------|
| Sardinian | Iceman    | Buryats    | Papuan | 0.001 | 0.000 | 2.4 | 495464 |
| Sardinian | Iceman    | Dolgans    | Papuan | 0.001 | 0.000 | 2.3 | 495464 |
| Sardinian | Iceman    | Kets       | Papuan | 0.001 | 0.000 | 2.4 | 495464 |
| Sardinian | Iceman    | Khakases   | Papuan | 0.001 | 0.000 | 2.5 | 495464 |
| Sardinian | Iceman    | Nganassans | Papuan | 0.001 | 0.000 | 1.9 | 495464 |
| Sardinian | Iceman    | Selkups    | Papuan | 0.000 | 0.000 | 1.6 | 495464 |
| Sardinian | Iceman    | Shors      | Papuan | 0.001 | 0.000 | 1.8 | 495464 |
| Sardinian | Iceman    | Tuvinians  | Papuan | 0.001 | 0.000 | 2.8 | 495464 |
| Sardinian | Iceman    | Nivkhs     | Papuan | 0.001 | 0.000 | 1.8 | 495464 |
| Sardinian | Iceman    | Yakut      | Papuan | 0.001 | 0.000 | 2.6 | 495464 |
| Sardinian | Iceman    | Evenkis    | Papuan | 0.001 | 0.000 | 2.5 | 495464 |
| Sardinian | Iceman    | Evens      | Papuan | 0.001 | 0.000 | 2.5 | 495464 |
| Sardinian | Iceman    | Yukaghirs  | Papuan | 0.001 | 0.000 | 2.4 | 495464 |
| Sardinian | Iceman    | Koryaks    | Papuan | 0.001 | 0.000 | 1.5 | 495464 |
| Sardinian | Iceman    | Chukchis   | Papuan | 0.001 | 0.000 | 2.1 | 495464 |
| Sardinian | Stuttgart | Altaians   | Papuan | 0.001 | 0.000 | 1.7 | 513224 |
| Sardinian | Stuttgart | Buryats    | Papuan | 0.000 | 0.000 | 1.4 | 513224 |
| Sardinian | Stuttgart | Dolgans    | Papuan | 0.000 | 0.000 | 1.5 | 513224 |
| Sardinian | Stuttgart | Kets       | Papuan | 0.001 | 0.000 | 1.8 | 513224 |
| Sardinian | Stuttgart | Khakases   | Papuan | 0.000 | 0.000 | 1.5 | 513224 |
| Sardinian | Stuttgart | Nganassans | Papuan | 0.001 | 0.000 | 1.6 | 513224 |
| Sardinian | Stuttgart | Selkups    | Papuan | 0.001 | 0.000 | 1.6 | 513224 |
| Sardinian | Stuttgart | Shors      | Papuan | 0.001 | 0.000 | 2.5 | 513224 |
| Sardinian | Stuttgart | Tuvinians  | Papuan | 0.001 | 0.000 | 2.0 | 513224 |
| Sardinian | Stuttgart | Nivkhs     | Papuan | 0.001 | 0.000 | 2.4 | 513224 |
| Sardinian | Stuttgart | Yakut      | Papuan | 0.001 | 0.000 | 1.9 | 513224 |
| Sardinian | Stuttgart | Evenkis    | Papuan | 0.001 | 0.000 | 1.6 | 513224 |
| Sardinian | Stuttgart | Evens      | Papuan | 0.000 | 0.000 | 1.3 | 513224 |
| Sardinian | Stuttgart | Yukaghirs  | Papuan | 0.001 | 0.000 | 1.5 | 513224 |
| Sardinian | Stuttgart | Koryaks    | Papuan | 0.001 | 0.000 | 1.6 | 513224 |
| Sardinian | Stuttgart | Chukchis   | Papuan | 0.001 | 0.000 | 1.9 | 513224 |

**Table S13.**

Correlation of  $f_4$  (Sardinian, Ancient)(Modern, Papuan) with admixture proportion of “HG” ancestral cluster

| individual | rho   | p        |
|------------|-------|----------|
| Kostenki   | 0.96  | 3.04E-18 |
| MA1        | -0.08 | 6.68E-01 |
| Ajv58      | -0.77 | 1.42E-07 |
| Motala     | -0.85 | 6.17E-10 |
| Brana      | -0.04 | 8.29E-01 |
| Loschbour  | -0.63 | 7.43E-05 |

**Table S14.**

“admixture”  $f_3$  for Siberian populations. For each population, the ten source population pairs with the lowest statistic are shown..

| p1       | p2           | p3               | f3     | sdJK  | Z     | nSites |
|----------|--------------|------------------|--------|-------|-------|--------|
| Altaians | Evens        | Iceman           | -0.021 | 0.001 | -31.4 | 454086 |
| Altaians | Evens        | Gok2             | -0.021 | 0.001 | -28.9 | 291421 |
| Altaians | Basque       | Evens            | -0.021 | 0.000 | -53.7 | 476000 |
| Altaians | Sardinian    | Evens            | -0.020 | 0.000 | -50.8 | 476077 |
| Altaians | Hezhen       | Ajv58            | -0.020 | 0.001 | -30.7 | 421937 |
| Altaians | NorthItalian | Evens            | -0.020 | 0.000 | -49.6 | 475581 |
| Altaians | Lithuanians  | Evens            | -0.020 | 0.000 | -49.6 | 475188 |
| Altaians | Orcadian     | Evens            | -0.020 | 0.000 | -51.6 | 475712 |
| Altaians | Evens        | Stuttgart        | -0.020 | 0.001 | -28.8 | 470609 |
| Altaians | Tuscan       | Evens            | -0.020 | 0.000 | -48.8 | 475140 |
| Buryats  | Evens        | Iceman           | -0.007 | 0.001 | -9.6  | 438197 |
| Buryats  | Evens        | Gok2             | -0.007 | 0.001 | -8.8  | 281364 |
| Buryats  | Evens        | Stuttgart        | -0.007 | 0.001 | -9.3  | 454149 |
| Buryats  | Sardinian    | Evens            | -0.007 | 0.000 | -13.7 | 461963 |
| Buryats  | Tuscan       | Evens            | -0.007 | 0.001 | -12.9 | 460782 |
| Buryats  | Cypriots     | Evens            | -0.007 | 0.001 | -13.1 | 461247 |
| Buryats  | Georgians    | Evens            | -0.006 | 0.000 | -13.6 | 461650 |
| Buryats  | NorthItalian | Evens            | -0.006 | 0.001 | -12.9 | 461363 |
| Buryats  | Druze        | Evens            | -0.006 | 0.000 | -13.3 | 462225 |
| Buryats  | Spanish      | Evens            | -0.006 | 0.001 | -12.7 | 461366 |
| Chukchis | Koryaks      | EastGreenlanders | -0.003 | 0.000 | -7.9  | 458150 |
| Chukchis | Koryaks      | WestGreenlanders | -0.003 | 0.000 | -6.8  | 460322 |
| Chukchis | Koryaks      | Loschbour        | -0.002 | 0.001 | -2.2  | 447305 |
| Chukchis | Koryaks      | Ajv58            | -0.001 | 0.001 | -2.1  | 400993 |
| Chukchis | Koryaks      | Motala           | -0.001 | 0.001 | -1.9  | 405670 |
| Chukchis | Koryaks      | Gok2             | -0.001 | 0.001 | -1.9  | 277335 |
| Chukchis | Lithuanians  | Koryaks          | -0.001 | 0.000 | -2.6  | 464586 |
| Chukchis | Koryaks      | Surui            | -0.001 | 0.001 | -1.9  | 450143 |
| Chukchis | Belarusians  | Koryaks          | -0.001 | 0.000 | -2.1  | 464397 |
| Chukchis | Orcadian     | Koryaks          | -0.001 | 0.000 | -2.0  | 466576 |
| Dolgans  | Evens        | Gok2             | -0.012 | 0.001 | -14.7 | 271143 |
| Dolgans  | Evens        | Iceman           | -0.012 | 0.001 | -14.7 | 422451 |
| Dolgans  | Sardinian    | Evens            | -0.012 | 0.001 | -20.7 | 452492 |
| Dolgans  | Basque       | Evens            | -0.011 | 0.001 | -21.3 | 452205 |
| Dolgans  | Evens        | Stuttgart        | -0.011 | 0.001 | -14.0 | 437819 |

|          |              |            |        |       |       |        |
|----------|--------------|------------|--------|-------|-------|--------|
| Dolgans  | Belarusians  | Evens      | -0.011 | 0.001 | -19.7 | 450172 |
| Dolgans  | Spanish      | Evens      | -0.011 | 0.001 | -20.3 | 451341 |
| Dolgans  | Tuscan       | Evens      | -0.011 | 0.001 | -20.3 | 449998 |
| Dolgans  | NorthItalian | Evens      | -0.011 | 0.001 | -19.9 | 451264 |
| Dolgans  | Lithuanians  | Evens      | -0.011 | 0.001 | -19.4 | 450406 |
| Evenkis  | Evens        | Iceman     | -0.007 | 0.001 | -8.8  | 428009 |
| Evenkis  | Evens        | Gok2       | -0.006 | 0.001 | -8.3  | 274896 |
| Evenkis  | Sardinian    | Evens      | -0.006 | 0.000 | -12.8 | 453730 |
| Evenkis  | Basque       | Evens      | -0.006 | 0.000 | -12.4 | 453585 |
| Evenkis  | Spanish      | Evens      | -0.006 | 0.001 | -12.3 | 452974 |
| Evenkis  | Evens        | Stuttgart  | -0.006 | 0.001 | -8.5  | 443624 |
| Evenkis  | Belarusians  | Evens      | -0.006 | 0.000 | -12.4 | 452326 |
| Evenkis  | Evens        | Loschbour  | -0.006 | 0.001 | -8.0  | 443638 |
| Evenkis  | Tuscan       | Evens      | -0.006 | 0.001 | -11.7 | 452171 |
| Evenkis  | French       | Evens      | -0.006 | 0.000 | -12.5 | 453936 |
| Evens    | Nganassans   | Nivkhs     | 0.008  | 0.001 | 13.2  | 415903 |
| Evens    | Hezhen       | Nganassans | 0.009  | 0.001 | 15.3  | 423279 |
| Evens    | Japanese     | Nganassans | 0.009  | 0.001 | 16.5  | 432185 |
| Evens    | Daur         | Nganassans | 0.010  | 0.001 | 17.4  | 426299 |
| Evens    | She          | Nganassans | 0.010  | 0.001 | 15.6  | 424197 |
| Evens    | Tujia        | Nganassans | 0.010  | 0.001 | 16.1  | 425845 |
| Evens    | Xibo         | Nganassans | 0.010  | 0.001 | 17.9  | 428999 |
| Evens    | Han          | Nganassans | 0.010  | 0.001 | 17.6  | 434447 |
| Evens    | Miao         | Nganassans | 0.010  | 0.001 | 17.2  | 425274 |
| Evens    | Naga         | Nganassans | 0.010  | 0.001 | 16.6  | 415507 |
| Kets     | Evens        | Motala     | -0.005 | 0.001 | -3.8  | 338072 |
| Kets     | Evens        | Ajv58      | -0.004 | 0.001 | -2.9  | 334402 |
| Kets     | Lithuanians  | Evens      | -0.002 | 0.001 | -2.4  | 421906 |
| Kets     | Evens        | MA1        | -0.002 | 0.001 | -1.6  | 262682 |
| Kets     | Orcadian     | Evens      | -0.002 | 0.001 | -1.8  | 425530 |
| Kets     | Evens        | Loschbour  | -0.002 | 0.001 | -1.2  | 373547 |
| Kets     | Belarusians  | Evens      | -0.002 | 0.001 | -1.5  | 421650 |
| Kets     | Oroqen       | Motala     | -0.001 | 0.001 | -0.9  | 338981 |
| Kets     | French       | Evens      | -0.001 | 0.001 | -1.2  | 429059 |
| Kets     | Ucranians    | Evens      | -0.001 | 0.001 | -1.2  | 427739 |
| Khakases | Basque       | Evens      | -0.022 | 0.000 | -55.2 | 477854 |
| Khakases | Evens        | Motala     | -0.022 | 0.001 | -27.9 | 428624 |
| Khakases | Orcadian     | Evens      | -0.022 | 0.000 | -53.1 | 477598 |
| Khakases | Evens        | Iceman     | -0.022 | 0.001 | -32.0 | 455875 |

|            |              |           |        |       |       |        |
|------------|--------------|-----------|--------|-------|-------|--------|
| Khakases   | Lithuanians  | Evens     | -0.022 | 0.000 | -52.3 | 477070 |
| Khakases   | Oroqen       | Motala    | -0.022 | 0.001 | -31.3 | 428640 |
| Khakases   | French       | Evens     | -0.022 | 0.000 | -55.4 | 478139 |
| Khakases   | Evens        | Gok2      | -0.022 | 0.001 | -28.4 | 292389 |
| Khakases   | Evens        | Stuttgart | -0.022 | 0.001 | -31.1 | 472427 |
| Khakases   | Hezhen       | Motala    | -0.022 | 0.001 | -30.7 | 428577 |
| Koryaks    | Evens        | Chukchis  | 0.016  | 0.001 | 29.1  | 450588 |
| Koryaks    | Oroqen       | Chukchis  | 0.017  | 0.001 | 32.3  | 452831 |
| Koryaks    | Nivkhs       | Chukchis  | 0.018  | 0.001 | 30.2  | 447583 |
| Koryaks    | Hezhen       | Chukchis  | 0.018  | 0.001 | 33.6  | 452168 |
| Koryaks    | Nganassans   | Chukchis  | 0.018  | 0.001 | 33.0  | 456451 |
| Koryaks    | Daur         | Chukchis  | 0.018  | 0.001 | 34.4  | 453800 |
| Koryaks    | Japanese     | Chukchis  | 0.018  | 0.001 | 34.9  | 457166 |
| Koryaks    | Evenkis      | Chukchis  | 0.018  | 0.001 | 35.6  | 458155 |
| Koryaks    | Tujia        | Chukchis  | 0.019  | 0.001 | 33.9  | 453696 |
| Koryaks    | Naga         | Chukchis  | 0.019  | 0.001 | 31.0  | 448441 |
| Nganassans | Evens        | Ajv58     | 0.007  | 0.001 | 8.0   | 388147 |
| Nganassans | Evens        | Gok2      | 0.008  | 0.001 | 8.1   | 268343 |
| Nganassans | Evens        | Motala    | 0.008  | 0.001 | 8.0   | 392871 |
| Nganassans | Evens        | Loschbour | 0.008  | 0.001 | 8.5   | 433037 |
| Nganassans | Lithuanians  | Evens     | 0.008  | 0.001 | 12.4  | 446603 |
| Nganassans | Evens        | Iceman    | 0.008  | 0.001 | 9.8   | 417811 |
| Nganassans | Belarusians  | Evens     | 0.008  | 0.001 | 12.9  | 446463 |
| Nganassans | Orcadian     | Evens     | 0.008  | 0.001 | 13.0  | 447777 |
| Nganassans | Hungarians   | Evens     | 0.009  | 0.001 | 13.6  | 448516 |
| Nganassans | Ucranians    | Evens     | 0.009  | 0.001 | 13.7  | 448607 |
| Nivkhs     | Evens        | Gok2      | 0.000  | 0.001 | 0.1   | 216081 |
| Nivkhs     | Evens        | Iceman    | 0.001  | 0.001 | 1.0   | 335331 |
| Nivkhs     | Evens        | Loschbour | 0.002  | 0.001 | 1.4   | 347894 |
| Nivkhs     | Sardinian    | Evens     | 0.002  | 0.001 | 1.9   | 419671 |
| Nivkhs     | Belarusians  | Evens     | 0.002  | 0.001 | 1.9   | 412685 |
| Nivkhs     | Tuscan       | Evens     | 0.002  | 0.001 | 2.1   | 411353 |
| Nivkhs     | Basque       | Evens     | 0.002  | 0.001 | 2.2   | 419005 |
| Nivkhs     | NorthItalian | Evens     | 0.002  | 0.001 | 2.2   | 415874 |
| Nivkhs     | Cypriots     | Evens     | 0.003  | 0.001 | 2.4   | 415869 |
| Nivkhs     | Oroqen       | Gok2      | 0.003  | 0.001 | 2.1   | 216932 |
| Selkups    | Evens        | Motala    | -0.018 | 0.001 | -22.4 | 419613 |
| Selkups    | Evens        | Ajv58     | -0.017 | 0.001 | -22.0 | 414678 |
| Selkups    | Lithuanians  | Evens     | -0.016 | 0.000 | -34.3 | 469068 |



|           |              |           |        |       |       |        |
|-----------|--------------|-----------|--------|-------|-------|--------|
| Selkups   | Orcadian     | Evens     | -0.016 | 0.000 | -35.1 | 470037 |
| Selkups   | Evens        | Loschbour | -0.016 | 0.001 | -19.0 | 462518 |
| Selkups   | Belarusians  | Evens     | -0.015 | 0.000 | -34.2 | 469013 |
| Selkups   | Evens        | Iceman    | -0.015 | 0.001 | -20.8 | 446373 |
| Selkups   | Evens        | Gok2      | -0.015 | 0.001 | -19.5 | 286467 |
| Selkups   | Basque       | Evens     | -0.015 | 0.000 | -34.8 | 470400 |
| Selkups   | French       | Evens     | -0.015 | 0.000 | -34.6 | 470859 |
| Shors     | Evens        | Motala    | -0.012 | 0.001 | -9.1  | 347812 |
| Shors     | Oroqen       | Motala    | -0.011 | 0.001 | -9.0  | 348475 |
| Shors     | Hezhen       | Motala    | -0.011 | 0.001 | -8.6  | 347920 |
| Shors     | Japanese     | Motala    | -0.011 | 0.001 | -8.8  | 350077 |
| Shors     | Tujia        | Motala    | -0.010 | 0.001 | -7.8  | 348424 |
| Shors     | Daur         | Motala    | -0.010 | 0.001 | -8.0  | 348791 |
| Shors     | She          | Motala    | -0.010 | 0.001 | -7.6  | 348015 |
| Shors     | Basque       | Evens     | -0.010 | 0.001 | -10.8 | 433463 |
| Shors     | Orcadian     | Evens     | -0.010 | 0.001 | -10.9 | 431660 |
| Shors     | Lithuanians  | Evens     | -0.010 | 0.001 | -10.5 | 428328 |
| Tuvinians | Evens        | Gok2      | -0.011 | 0.001 | -13.9 | 281243 |
| Tuvinians | Evens        | Iceman    | -0.010 | 0.001 | -14.7 | 438139 |
| Tuvinians | Basque       | Evens     | -0.010 | 0.000 | -21.5 | 462473 |
| Tuvinians | Sardinian    | Evens     | -0.010 | 0.000 | -21.4 | 462627 |
| Tuvinians | Cypriots     | Evens     | -0.010 | 0.000 | -21.4 | 461850 |
| Tuvinians | Spanish      | Evens     | -0.010 | 0.001 | -20.4 | 461932 |
| Tuvinians | NorthItalian | Evens     | -0.010 | 0.000 | -20.9 | 461968 |
| Tuvinians | Tuscan       | Evens     | -0.010 | 0.001 | -19.8 | 461256 |
| Tuvinians | French       | Evens     | -0.010 | 0.000 | -21.2 | 462811 |
| Tuvinians | Orcadian     | Evens     | -0.010 | 0.000 | -20.5 | 462188 |
| Yakut     | Evens        | Gok2      | -0.007 | 0.001 | -10.0 | 286746 |
| Yakut     | Evens        | Iceman    | -0.007 | 0.001 | -10.3 | 447040 |
| Yakut     | Sardinian    | Evens     | -0.007 | 0.000 | -14.9 | 468274 |
| Yakut     | Basque       | Evens     | -0.007 | 0.000 | -15.0 | 468250 |
| Yakut     | Tuscan       | Evens     | -0.007 | 0.000 | -14.6 | 467548 |
| Yakut     | Spanish      | Evens     | -0.007 | 0.000 | -14.4 | 467908 |
| Yakut     | Belarusians  | Evens     | -0.007 | 0.000 | -14.4 | 467615 |
| Yakut     | Cypriots     | Evens     | -0.007 | 0.000 | -14.4 | 467825 |
| Yakut     | NorthItalian | Evens     | -0.007 | 0.000 | -14.1 | 467942 |
| Yakut     | Georgians    | Evens     | -0.007 | 0.000 | -14.6 | 468133 |
| Yukaghirs | Evens        | Gok2      | -0.017 | 0.001 | -18.7 | 267036 |
| Yukaghirs | Evens        | Loschbour | -0.017 | 0.001 | -18.4 | 431021 |

|           |             |           |        |       |       |        |
|-----------|-------------|-----------|--------|-------|-------|--------|
| Yukaghirs | Lithuanians | Evens     | -0.016 | 0.001 | -27.7 | 448486 |
| Yukaghirs | Evens       | Iceman    | -0.016 | 0.001 | -19.1 | 415742 |
| Yukaghirs | Sardinian   | Evens     | -0.016 | 0.001 | -28.3 | 451497 |
| Yukaghirs | Evens       | Stuttgart | -0.016 | 0.001 | -18.1 | 431259 |
| Yukaghirs | Basque      | Evens     | -0.016 | 0.001 | -28.3 | 451099 |
| Yukaghirs | Belarusians | Evens     | -0.015 | 0.001 | -27.8 | 448330 |
| Yukaghirs | Orcadian    | Evens     | -0.015 | 0.001 | -26.8 | 450271 |
| Yukaghirs | Evens       | Ajv58     | -0.015 | 0.001 | -17.8 | 386510 |

**Table S15.** $f_4$ -ratio for Neanderthal ancestry proportion with modern individuals from (34).

| a        | b           | c          | o        | x         | pNeanderthal | sdJK  | Z    | nSites  |
|----------|-------------|------------|----------|-----------|--------------|-------|------|---------|
| Denisova | Mezmaiskaya | MbutiPygmy | AltaiNea | Sardinian | 0.017        | 0.003 | 5.81 | 1004976 |
| Denisova | Mezmaiskaya | MbutiPygmy | AltaiNea | French    | 0.016        | 0.003 | 5.53 | 1004799 |
| Denisova | Mezmaiskaya | MbutiPygmy | AltaiNea | Han       | 0.018        | 0.003 | 5.90 | 1004026 |
| Denisova | Mezmaiskaya | MbutiPygmy | AltaiNea | Dai       | 0.015        | 0.003 | 5.28 | 1003078 |
| Denisova | Mezmaiskaya | MbutiPygmy | AltaiNea | Kostenki  | 0.024        | 0.004 | 6.69 | 897672  |
| Denisova | Mezmaiskaya | MbutiPygmy | AltaiNea | MA1       | 0.018        | 0.004 | 5.07 | 711123  |
| Denisova | Mezmaiskaya | MbutiPygmy | AltaiNea | Loschbour | 0.019        | 0.003 | 6.04 | 1008232 |
| Denisova | Mezmaiskaya | MbutiPygmy | AltaiNea | Brana     | 0.025        | 0.003 | 7.61 | 780227  |
| Denisova | Mezmaiskaya | MbutiPygmy | AltaiNea | Motala    | 0.019        | 0.003 | 6.33 | 913741  |
| Denisova | Mezmaiskaya | MbutiPygmy | AltaiNea | Ajv58     | 0.020        | 0.003 | 5.95 | 894481  |
| Denisova | Mezmaiskaya | MbutiPygmy | AltaiNea | Gok2      | 0.016        | 0.003 | 4.87 | 669789  |
| Denisova | Mezmaiskaya | MbutiPygmy | AltaiNea | Iceman    | 0.017        | 0.003 | 5.78 | 964143  |
| Denisova | Mezmaiskaya | MbutiPygmy | AltaiNea | Stuttgart | 0.019        | 0.003 | 5.89 | 1007448 |

**Table S16.***f*<sub>4</sub>-ratio for Neanderthal ancestry proportion with modern individuals from (183).

| a        | b           | c          | o        | x         | pNeanderthal | sdJK  | Z    | nSites |
|----------|-------------|------------|----------|-----------|--------------|-------|------|--------|
| Denisova | Mezmaiskaya | MbutiPygmy | AltaiNea | Sardinian | 0.017        | 0.003 | 6.01 | 677063 |
| Denisova | Mezmaiskaya | MbutiPygmy | AltaiNea | French    | 0.016        | 0.003 | 5.43 | 684069 |
| Denisova | Mezmaiskaya | MbutiPygmy | AltaiNea | Mari      | 0.016        | 0.004 | 3.74 | 178064 |
| Denisova | Mezmaiskaya | MbutiPygmy | AltaiNea | Avar      | 0.015        | 0.003 | 4.74 | 424430 |
| Denisova | Mezmaiskaya | MbutiPygmy | AltaiNea | Tajik     | 0.017        | 0.003 | 5.69 | 562447 |
| Denisova | Mezmaiskaya | MbutiPygmy | AltaiNea | Indian    | 0.016        | 0.003 | 5.06 | 505542 |
| Denisova | Mezmaiskaya | MbutiPygmy | AltaiNea | Han       | 0.022        | 0.003 | 6.95 | 683309 |
| Denisova | Mezmaiskaya | MbutiPygmy | AltaiNea | Dai       | 0.017        | 0.003 | 5.66 | 685412 |
| Denisova | Mezmaiskaya | MbutiPygmy | AltaiNea | Kostenki  | 0.023        | 0.004 | 6.27 | 617147 |
| Denisova | Mezmaiskaya | MbutiPygmy | AltaiNea | MA1       | 0.016        | 0.004 | 4.27 | 488737 |
| Denisova | Mezmaiskaya | MbutiPygmy | AltaiNea | Loschbour | 0.023        | 0.003 | 6.64 | 692763 |
| Denisova | Mezmaiskaya | MbutiPygmy | AltaiNea | Brana     | 0.026        | 0.004 | 7.22 | 534776 |
| Denisova | Mezmaiskaya | MbutiPygmy | AltaiNea | Motala    | 0.022        | 0.003 | 6.37 | 628033 |
| Denisova | Mezmaiskaya | MbutiPygmy | AltaiNea | Ajv58     | 0.022        | 0.003 | 6.35 | 615002 |
| Denisova | Mezmaiskaya | MbutiPygmy | AltaiNea | Gok2      | 0.018        | 0.003 | 5.25 | 457380 |
| Denisova | Mezmaiskaya | MbutiPygmy | AltaiNea | Iceman    | 0.017        | 0.003 | 5.49 | 659874 |
| Denisova | Mezmaiskaya | MbutiPygmy | AltaiNea | Stuttgart | 0.019        | 0.003 | 5.65 | 692220 |

**Table S17.**

$f_4$ -ratio for Neanderthal ancestry proportion with modern individuals from (34); stratified by introgressed regions detected in modern individuals.

| a        | b           | c          | o        | x         | pNeanderthal | sdJK  | Z     | nSites | mask  |
|----------|-------------|------------|----------|-----------|--------------|-------|-------|--------|-------|
| Denisova | Mezmaiskaya | MbutiPygmy | AltaiNea | Sardinian | 0,012        | 0,003 | 3,55  | 760521 | akey  |
| Denisova | Mezmaiskaya | MbutiPygmy | AltaiNea | Sardinian | 0,002        | 0,003 | 0,48  | 590808 | reich |
| Denisova | Mezmaiskaya | MbutiPygmy | AltaiNea | French    | 0,010        | 0,003 | 2,88  | 760442 | akey  |
| Denisova | Mezmaiskaya | MbutiPygmy | AltaiNea | French    | 0,001        | 0,003 | 0,43  | 590711 | reich |
| Denisova | Mezmaiskaya | MbutiPygmy | AltaiNea | Han       | 0,009        | 0,004 | 2,28  | 759829 | akey  |
| Denisova | Mezmaiskaya | MbutiPygmy | AltaiNea | Han       | -0,003       | 0,004 | -0,74 | 590238 | reich |
| Denisova | Mezmaiskaya | MbutiPygmy | AltaiNea | Dai       | 0,006        | 0,003 | 1,67  | 759150 | akey  |
| Denisova | Mezmaiskaya | MbutiPygmy | AltaiNea | Dai       | -0,003       | 0,003 | -0,89 | 589696 | reich |
| Denisova | Mezmaiskaya | MbutiPygmy | AltaiNea | Kostenki  | 0,016        | 0,004 | 4,01  | 678656 | akey  |
| Denisova | Mezmaiskaya | MbutiPygmy | AltaiNea | Kostenki  | 0,009        | 0,004 | 2,19  | 528550 | reich |
| Denisova | Mezmaiskaya | MbutiPygmy | AltaiNea | MA1       | 0,009        | 0,004 | 2,18  | 537658 | akey  |
| Denisova | Mezmaiskaya | MbutiPygmy | AltaiNea | MA1       | -0,002       | 0,004 | -0,46 | 418394 | reich |
| Denisova | Mezmaiskaya | MbutiPygmy | AltaiNea | Loschbour | 0,014        | 0,004 | 3,77  | 763076 | akey  |
| Denisova | Mezmaiskaya | MbutiPygmy | AltaiNea | Loschbour | 0,004        | 0,004 | 1,09  | 592803 | reich |
| Denisova | Mezmaiskaya | MbutiPygmy | AltaiNea | Brana     | 0,015        | 0,004 | 3,97  | 589266 | akey  |
| Denisova | Mezmaiskaya | MbutiPygmy | AltaiNea | Brana     | 0,004        | 0,004 | 0,96  | 460529 | reich |
| Denisova | Mezmaiskaya | MbutiPygmy | AltaiNea | Motala    | 0,010        | 0,004 | 2,86  | 691658 | akey  |
| Denisova | Mezmaiskaya | MbutiPygmy | AltaiNea | Motala    | -0,001       | 0,004 | -0,21 | 537548 | reich |
| Denisova | Mezmaiskaya | MbutiPygmy | AltaiNea | Ajv58     | 0,013        | 0,004 | 3,22  | 676605 | akey  |
| Denisova | Mezmaiskaya | MbutiPygmy | AltaiNea | Ajv58     | -0,001       | 0,004 | -0,25 | 525607 | reich |
| Denisova | Mezmaiskaya | MbutiPygmy | AltaiNea | Gok2      | 0,006        | 0,004 | 1,71  | 504954 | akey  |
| Denisova | Mezmaiskaya | MbutiPygmy | AltaiNea | Gok2      | -0,004       | 0,004 | -0,96 | 396489 | reich |
| Denisova | Mezmaiskaya | MbutiPygmy | AltaiNea | Iceman    | 0,013        | 0,003 | 3,83  | 728952 | akey  |
| Denisova | Mezmaiskaya | MbutiPygmy | AltaiNea | Iceman    | 0,003        | 0,003 | 0,79  | 566745 | reich |
| Denisova | Mezmaiskaya | MbutiPygmy | AltaiNea | Stuttgart | 0,011        | 0,004 | 2,85  | 762518 | akey  |
| Denisova | Mezmaiskaya | MbutiPygmy | AltaiNea | Stuttgart | 0,001        | 0,004 | 0,21  | 592314 | reich |

**Table S18.**

$f_4$ -ratio for Neanderthal ancestry proportion with modern individuals from (183); stratified by introgressed regions detected in modern individuals.

| a        | b           | c          | o        | x         | pNeanderthal | sdJK  | Z     | nSites | mask  |
|----------|-------------|------------|----------|-----------|--------------|-------|-------|--------|-------|
| Denisova | Mezmaiskaya | MbutiPygmy | AltaiNea | Sardinian | 0,011        | 0,003 | 3,22  | 512216 | akey  |
| Denisova | Mezmaiskaya | MbutiPygmy | AltaiNea | Sardinian | 0,004        | 0,004 | 1,00  | 399938 | reich |
| Denisova | Mezmaiskaya | MbutiPygmy | AltaiNea | French    | 0,008        | 0,003 | 2,42  | 517563 | akey  |
| Denisova | Mezmaiskaya | MbutiPygmy | AltaiNea | French    | 0,002        | 0,004 | 0,53  | 404314 | reich |
| Denisova | Mezmaiskaya | MbutiPygmy | AltaiNea | Mari      | 0,009        | 0,005 | 1,81  | 133052 | akey  |
| Denisova | Mezmaiskaya | MbutiPygmy | AltaiNea | Mari      | 0,000        | 0,006 | -0,02 | 109600 | reich |
| Denisova | Mezmaiskaya | MbutiPygmy | AltaiNea | Avar      | 0,008        | 0,004 | 2,02  | 318007 | akey  |
| Denisova | Mezmaiskaya | MbutiPygmy | AltaiNea | Avar      | -0,001       | 0,004 | -0,17 | 254814 | reich |
| Denisova | Mezmaiskaya | MbutiPygmy | AltaiNea | Tajik     | 0,010        | 0,004 | 2,76  | 423368 | akey  |
| Denisova | Mezmaiskaya | MbutiPygmy | AltaiNea | Tajik     | 0,001        | 0,004 | 0,27  | 334278 | reich |
| Denisova | Mezmaiskaya | MbutiPygmy | AltaiNea | Indian    | 0,007        | 0,004 | 1,93  | 380613 | akey  |
| Denisova | Mezmaiskaya | MbutiPygmy | AltaiNea | Indian    | 0,001        | 0,004 | 0,32  | 300566 | reich |
| Denisova | Mezmaiskaya | MbutiPygmy | AltaiNea | Han       | 0,013        | 0,004 | 3,57  | 517017 | akey  |
| Denisova | Mezmaiskaya | MbutiPygmy | AltaiNea | Han       | 0,003        | 0,004 | 0,81  | 403867 | reich |
| Denisova | Mezmaiskaya | MbutiPygmy | AltaiNea | Dai       | 0,007        | 0,003 | 2,13  | 518513 | akey  |
| Denisova | Mezmaiskaya | MbutiPygmy | AltaiNea | Dai       | -0,001       | 0,004 | -0,20 | 405055 | reich |
| Denisova | Mezmaiskaya | MbutiPygmy | AltaiNea | Kostenki  | 0,015        | 0,004 | 3,60  | 466502 | akey  |
| Denisova | Mezmaiskaya | MbutiPygmy | AltaiNea | Kostenki  | 0,007        | 0,004 | 1,64  | 365357 | reich |
| Denisova | Mezmaiskaya | MbutiPygmy | AltaiNea | MA1       | 0,005        | 0,004 | 1,12  | 369742 | akey  |
| Denisova | Mezmaiskaya | MbutiPygmy | AltaiNea | MA1       | -0,003       | 0,004 | -0,68 | 289663 | reich |
| Denisova | Mezmaiskaya | MbutiPygmy | AltaiNea | Loschbour | 0,018        | 0,004 | 4,62  | 524276 | akey  |
| Denisova | Mezmaiskaya | MbutiPygmy | AltaiNea | Loschbour | 0,008        | 0,004 | 1,96  | 409648 | reich |
| Denisova | Mezmaiskaya | MbutiPygmy | AltaiNea | Brana     | 0,015        | 0,004 | 3,70  | 403610 | akey  |
| Denisova | Mezmaiskaya | MbutiPygmy | AltaiNea | Brana     | 0,006        | 0,004 | 1,35  | 317686 | reich |
| Denisova | Mezmaiskaya | MbutiPygmy | AltaiNea | Motala    | 0,014        | 0,004 | 3,50  | 475259 | akey  |
| Denisova | Mezmaiskaya | MbutiPygmy | AltaiNea | Motala    | 0,003        | 0,004 | 0,61  | 371481 | reich |
| Denisova | Mezmaiskaya | MbutiPygmy | AltaiNea | Ajv58     | 0,013        | 0,004 | 3,35  | 465111 | akey  |
| Denisova | Mezmaiskaya | MbutiPygmy | AltaiNea | Ajv58     | 0,002        | 0,004 | 0,37  | 363451 | reich |
| Denisova | Mezmaiskaya | MbutiPygmy | AltaiNea | Gok2      | 0,006        | 0,004 | 1,63  | 344322 | akey  |
| Denisova | Mezmaiskaya | MbutiPygmy | AltaiNea | Gok2      | -0,002       | 0,004 | -0,50 | 272486 | reich |
| Denisova | Mezmaiskaya | MbutiPygmy | AltaiNea | Iceman    | 0,011        | 0,004 | 3,13  | 498660 | akey  |
| Denisova | Mezmaiskaya | MbutiPygmy | AltaiNea | Iceman    | 0,002        | 0,004 | 0,60  | 390061 | reich |
| Denisova | Mezmaiskaya | MbutiPygmy | AltaiNea | Stuttgart | 0,010        | 0,004 | 2,66  | 523853 | akey  |
| Denisova | Mezmaiskaya | MbutiPygmy | AltaiNea | Stuttgart | 0,002        | 0,004 | 0,38  | 409283 | reich |

## Full Reference List

1. R. G. Klein, Archeology and the evolution of human behavior. *Evol. Anthropol.* **9**, 17–36 (2000). [doi:10.1002/\(SICI\)1520-6505\(2000\)9:1<17::AID-EVAN3>3.0.CO;2-A](https://doi.org/10.1002/(SICI)1520-6505(2000)9:1<17::AID-EVAN3>3.0.CO;2-A)
2. P. Mellars, A new radiocarbon revolution and the dispersal of modern humans in Eurasia. *Nature* **439**, 931–935 (2006). [Medline doi:10.1038/nature04521](https://doi.org/10.1038/nature04521)
3. M. Rasmussen, X. Guo, Y. Wang, K. E. Lohmueller, S. Rasmussen, A. Albrechtsen, L. Skotte, S. Lindgreen, M. Metspalu, T. Jombart, T. Kivisild, W. Zhai, A. Eriksson, A. Manica, L. Orlando, F. M. De La Vega, S. Tridico, E. Metspalu, K. Nielsen, M. C. Ávila-Arcos, J. V. Moreno-Mayar, C. Muller, J. Dortch, M. T. Gilbert, O. Lund, A. Wesolowska, M. Karmin, L. A. Weinert, B. Wang, J. Li, S. Tai, F. Xiao, T. Hanihara, G. van Driem, A. R. Jha, F. X. Ricaut, P. de Knijff, A. B. Migliano, I. Gallego Romero, K. Kristiansen, D. M. Lambert, S. Brunak, P. Forster, B. Brinkmann, O. Nehlich, M. Bunce, M. Richards, R. Gupta, C. D. Bustamante, A. Krogh, R. A. Foley, M. M. Lahr, F. Balloux, T. Sicheritz-Pontén, R. Villems, R. Nielsen, J. Wang, E. Willerslev, An Aboriginal Australian genome reveals separate human dispersals into Asia. *Science* **334**, 94–98 (2011). [Medline doi:10.1126/science.1211177](https://doi.org/10.1126/science.1211177)
4. A. E. Marks, *Prehistory and Paleoenvironments in the Central Negev, Israel* (Southern Methodist University Press, Dallas, 1983).
5. N. R. Rebollo, S. Weiner, F. Brock, L. Meignen, P. Goldberg, A. Belfer-Cohen, O. Bar-Yosef, E. Boaretto, New radiocarbon dating of the transition from the Middle to the Upper Paleolithic in Kebara Cave, Israel. *J. Archaeol. Sci.* **38**, 2424–2433 (2011). [doi:10.1016/j.jas.2011.05.010](https://doi.org/10.1016/j.jas.2011.05.010)
6. A. Gibbons, Human evolution. Oldest Homo sapiens genome pinpoints Neandertal input. *Science* **343**, 1417 (2014). [Medline doi:10.1126/science.343.6178.1417](https://doi.org/10.1126/science.343.6178.1417)
7. O. Bar-Yosef, A. Belfer-Cohen, D. S. Adler, The implications of the Middle-Upper Paleolithic chronological boundary in the Caucasus to Eurasian prehistory. *Anthropologie* **XLIV**, 49–60 (2006).
8. N. Sirakov, T. Tsanova, S. Sirakova, S. Taneva, I. Krumov, I. Dimitrova, N. Kovatcheva, Un nouveau faciès lamellaire du début du Paléolithique supérieur dans les Balkans. *Paéorient* **2007**, 131–144 (2007).
9. S. Benazzi, K. Douka, C. Fornai, C. C. Bauer, O. Kullmer, J. Svoboda, I. Pap, F. Mallegni, P. Bayle, M. Coquerelle, S. Condemi, A. Ronchitelli, K. Harvati, G. W. Weber, Early dispersal of modern humans in Europe and implications for Neanderthal behaviour. *Nature* **479**, 525–528 (2011). [Medline doi:10.1038/nature10617](https://doi.org/10.1038/nature10617)
10. S. L. Kuhn, M. C. Stiner, E. Güleç, I. Ozer, H. Yilmaz, I. Baykara, A. Açikkol, P. Goldberg, K. M. Molina, E. Unay, F. Suata-Alpaslan, The early Upper Paleolithic occupations at Uçağızlı Cave (Hatay, Turkey). *J. Hum. Evol.* **56**, 87–113 (2009). [Medline doi:10.1016/j.jhevol.2008.07.014](https://doi.org/10.1016/j.jhevol.2008.07.014)
11. T. Higham, T. Compton, C. Stringer, R. Jacobi, B. Shapiro, E. Trinkaus, B. Chandler, F. Gröning, C. Collins, S. Hillson, P. O'Higgins, C. FitzGerald, M. Fagan, The earliest

- evidence for anatomically modern humans in northwestern Europe. *Nature* **479**, 521–524 (2011). [Medline doi:10.1038/nature10484](#)
12. S. E. Bailey, T. D. Weaver, J.-J. Hublin, Who made the Aurignacian and other early Upper Paleolithic industries? *J. Hum. Evol.* **57**, 11–26 (2009). [Medline doi:10.1016/j.jhevol.2009.02.003](#)
  13. C. A. Bergman, C. B. Stringer, Fifty years after: Egbert, an early Upper Palaeolithic juvenile from Ksar Akil, Lebanon. *Paéorient* **15**, 99–111 (1989). [doi:10.3406/paleo.1989.4512](#)
  14. V. Formicola, Early Aurignacian Deciduous Incisor from Riparo Bombrini at Balzi Rossi (Grimaldi, Italy). *Riv. Antropol.* **67**, 287–292 (1989).
  15. D. Henry-Gambier, C. Normand, J.-M. Pétilion, Datation radiocarbone directe et attribution culturelle des vestiges humains paléolithiques de la grotte d'Isturitz (Pyrénées-Atlantiques). *Bull. Société Préhistorique Fr.* **110**, 645–656 (2013).
  16. J.-J. Hublin, The earliest modern human colonization of Europe. *Proc. Natl. Acad. Sci. U.S.A.* **109**, 13471–13472 (2012). [Medline doi:10.1073/pnas.1211082109](#)
  17. C. Yazbeck, Le Paleolithique du Liban: Bilan critique. *Paéorient* **30**, 111–126 (2004). [doi:10.3406/paleo.2004.1015](#)
  18. P. R. Nigst, P. Haesaerts, F. Damblon, C. Frank-Fellner, C. Mallol, B. Viola, M. Götzinger, L. Niven, G. Trnka, J. J. Hublin, Early modern human settlement of Europe north of the Alps occurred 43,500 years ago in a cold steppe-type environment. *Proc. Natl. Acad. Sci. U.S.A.* **111**, 14394–14399 (2014). [Medline doi:10.1073/pnas.1412201111](#)
  19. P. Skoglund, H. Malmström, M. Raghavan, J. Storå, P. Hall, E. Willerslev, M. T. Gilbert, A. Götherström, M. Jakobsson, Origins and genetic legacy of Neolithic farmers and hunter-gatherers in Europe. *Science* **336**, 466–469 (2012). [Medline doi:10.1126/science.1216304](#)
  20. P. Skoglund, H. Malmström, A. Omrak, M. Raghavan, C. Valdiosera, T. Günther, P. Hall, K. Tambets, J. Parik, K. G. Sjögren, J. Apel, E. Willerslev, J. Storå, A. Götherström, M. Jakobsson, Genomic diversity and admixture differs for Stone-Age Scandinavian foragers and farmers. *Science* **344**, 747–750 (2014). [Medline doi:10.1126/science.1253448](#)
  21. I. Lazaridis, N. Patterson, A. Mitnik, G. Renaud, S. Mallick, K. Kirsanow, P. H. Sudmant, J. G. Schraiber, S. Castellano, M. Lipson, B. Berger, C. Economou, R. Bollongino, Q. Fu, K. I. Bos, S. Nordenfelt, H. Li, C. de Filippo, K. Prüfer, S. Sawyer, C. Posth, W. Haak, F. Hallgren, E. Fornander, N. Rohland, D. Delsate, M. Francken, J. M. Guinet, J. Wahl, G. Ayodo, H. A. Babiker, G. Bailliet, E. Balanovska, O. Balanovsky, R. Barrantes, G. Bedoya, H. Ben-Ami, J. Bene, F. Berrada, C. M. Bravi, F. Brisighelli, G. B. Busby, F. Cali, M. Churnosov, D. E. Cole, D. Corach, L. Damba, G. van Driem, S. Dryomov, J. M. Dugoujon, S. A. Fedorova, I. Gallego Romero, M. Gubina, M. Hammer, B. M. Henn, T. Hervig, U. Hodoglugil, A. R. Jha, S. Karachanak-Yankova, R. Khusainova, E. Khusnutdinova, R. Kittles, T. Kivisild, W. Klitz, V. Kučinskas, A. Kushniarevich, L. Laredj, S. Litvinov, T. Loukidis, R. W. Mahley, B. Melegh, E. Metspalu, J. Molina, J. Mountain, K. Näkkäläjärvi, D. Nesheva, T. Nyambo, L. Osipova, J. Parik, F. Platonov, O. Posukh, V. Romano, F. Rothhammer, I. Rudan, R. Ruizbakiev, H. Sahakyan, A. Sajantila, A. Salas, E. B. Starikovskaya, A. Tarekegn, D. Toncheva, S. Turdikulova, I. Uktveryte, O. Utevska, R. Vasquez, M. Villena, M. Voevoda, C. A. Winkler, L.



- Yepiskoposyan, P. Zalloua, T. Zemunik, A. Cooper, C. Capelli, M. G. Thomas, A. Ruiz-Linares, S. A. Tishkoff, L. Singh, K. Thangaraj, R. Villems, D. Comas, R. Sukernik, M. Metspalu, M. Meyer, E. E. Eichler, J. Burger, M. Slatkin, S. Pääbo, J. Kelso, D. Reich, J. Krause, Ancient human genomes suggest three ancestral populations for present-day Europeans. *Nature* **513**, 409–413 (2014). [Medline doi:10.1038/nature13673](#)
22. I. Olalde, M. E. Allentoft, F. Sánchez-Quinto, G. Santpere, C. W. Chiang, M. DeGiorgio, J. Prado-Martinez, J. A. Rodríguez, S. Rasmussen, J. Quilez, O. Ramírez, U. M. Marigorta, M. Fernández-Callejo, M. E. Prada, J. M. Encinas, R. Nielsen, M. G. Netea, J. Novembre, R. A. Sturm, P. Sabeti, T. Marquès-Bonet, A. Navarro, E. Willerslev, C. Lalueza-Fox, Derived immune and ancestral pigmentation alleles in a 7,000-year-old Mesolithic European. *Nature* **507**, 225–228 (2014). [Medline doi:10.1038/nature12960](#)
23. M. Raghavan, P. Skoglund, K. E. Graf, M. Metspalu, A. Albrechtsen, I. Moltke, S. Rasmussen, T. W. Stafford Jr., L. Orlando, E. Metspalu, M. Karmin, K. Tambets, S. Rootsi, R. Mägi, P. F. Campos, E. Balanovska, O. Balanovsky, E. Khusnutdinova, S. Litvinov, L. P. Osipova, S. A. Fedorova, M. I. Voevoda, M. DeGiorgio, T. Sicheritz-Ponten, S. Brunak, S. Demeshchenko, T. Kivisild, R. Villems, R. Nielsen, M. Jakobsson, E. Willerslev, Upper Palaeolithic Siberian genome reveals dual ancestry of Native Americans. *Nature* **505**, 87–91 (2014). [Medline doi:10.1038/nature12736](#)
24. A. N. Rogachev, *Aleksandrovskoe poselenie drevnekamennogo veka u sela Kostenki na Donu* (Moscow-Leningrad, 1955).
25. A. Marom, J. S. O. McCullagh, T. F. G. Higham, A. A. Sinitsyn, R. E. M. Hedges, Single amino acid radiocarbon dating of Upper Paleolithic modern humans. *Proc. Natl. Acad. Sci. U.S.A.* **109**, 6878–6881 (2012). [Medline doi:10.1073/pnas.1116328109](#)
26. D. M. Pyle, G. D. Ricketts, V. Margari, T. H. van Andel, A. A. Sinitsyn, N. D. Praslov, S. Lisitsyn, Wide dispersal and deposition of distal tephra during the Pleistocene `Campanian Ignimbrite/Y5' eruption, Italy. *Quat. Sci. Rev.* **25**, 2713–2728 (2006). [doi:10.1016/j.quascirev.2006.06.008](#)
27. A. A. Sinitsyn, J. F. Hoffecker, Radiocarbon dating and chronology of the Early Upper Paleolithic at Kostenki. *Quat. Int.* **152-153**, 164–174 (2006). [doi:10.1016/j.quaint.2005.12.007](#)
28. L. B. Vishnyatsky, P. E. Nehorosheve, in *The beginning of the Upper Paleolithic on the Russian Plain*. (University of California Press, Berkeley, CA, Brantingham PJ, Kuhn SL, Kerry KW., 2004), pp. 80–96.
29. N. Rohland, M. Hofreiter, Ancient DNA extraction from bones and teeth. *Nat. Protoc.* **2**, 1756–1762 (2007). [Medline doi:10.1038/nprot.2007.247](#)
30. J. Dabney, M. Knapp, I. Glocke, M. T. Gansauge, A. Weihmann, B. Nickel, C. Valdiosera, N. García, S. Pääbo, J. L. Arsuaga, M. Meyer, Complete mitochondrial genome sequence of a Middle Pleistocene cave bear reconstructed from ultrashort DNA fragments. *Proc. Natl. Acad. Sci. U.S.A.* **110**, 15758–15763 (2013). [Medline doi:10.1073/pnas.1314445110](#)
31. A. W. Briggs, U. Stenzel, P. L. Johnson, R. E. Green, J. Kelso, K. Prüfer, M. Meyer, J. Krause, M. T. Ronan, M. Lachmann, S. Pääbo, Patterns of damage in genomic DNA

- sequences from a Neandertal. *Proc. Natl. Acad. Sci. U.S.A.* **104**, 14616–14621 (2007). [Medline doi:10.1073/pnas.0704665104](#)
32. G. R. Feehery, E. Yigit, S. O. Oyola, B. W. Langhorst, V. T. Schmidt, F. J. Stewart, E. T. Dimalanta, L. A. Amaral-Zettler, T. Davis, M. A. Quail, S. Pradhan, A method for selectively enriching microbial DNA from contaminating vertebrate host DNA. *PLOS ONE* **8**, e76096 (2013). [Medline doi:10.1371/journal.pone.0076096](#)
  33. J. Krause, Q. Fu, J. M. Good, B. Viola, M. V. Shunkov, A. P. Derevianko, S. Pääbo, The complete mitochondrial DNA genome of an unknown hominin from southern Siberia. *Nature* **464**, 894–897 (2010). [Medline doi:10.1038/nature08976](#)
  34. K. Prüfer, F. Racimo, N. Patterson, F. Jay, S. Sankararaman, S. Sawyer, A. Heinze, G. Renaud, P. H. Sudmant, C. de Filippo, H. Li, S. Mallick, M. Dannemann, Q. Fu, M. Kircher, M. Kuhlwilm, M. Lachmann, M. Meyer, M. Ongyerth, M. Siebauer, C. Theunert, A. Tandon, P. Moorjani, J. Pickrell, J. C. Mullikin, S. H. Vohr, R. E. Green, I. Hellmann, P. L. Johnson, H. Blanche, H. Cann, J. O. Kitzman, J. Shendure, E. E. Eichler, E. S. Lein, T. E. Bakken, L. V. Golovanova, V. B. Doronichev, M. V. Shunkov, A. P. Derevianko, B. Viola, M. Slatkin, D. Reich, J. Kelso, S. Pääbo, The complete genome sequence of a Neanderthal from the Altai Mountains. *Nature* **505**, 43–49 (2014). [Medline doi:10.1038/nature12886](#)
  35. D. H. Alexander, J. Novembre, K. Lange, Fast model-based estimation of ancestry in unrelated individuals. *Genome Res.* **19**, 1655–1664 (2009). [Medline doi:10.1101/gr.094052.109](#)
  36. N. J. Patterson, P. Moorjani, Y. Luo, S. Mallick, N. Rohland, Y. Zhan, T. Genschoreck, T. Webster, D. Reich, Ancient admixture in human history. *Genetics* **2012**, genetics.112.145037 (2012).
  37. P. Skoglund, B. H. Northoff, M. V. Shunkov, A. P. Derevianko, S. Pääbo, J. Krause, M. Jakobsson, Separating endogenous ancient DNA from modern day contamination in a Siberian Neandertal. *Proc. Natl. Acad. Sci. U.S.A.* **111**, 2229–2234 (2014). [Medline doi:10.1073/pnas.1318934111](#)
  38. S. Sankararaman, S. Mallick, M. Dannemann, K. Prüfer, J. Kelso, S. Pääbo, N. Patterson, D. Reich, The genomic landscape of Neanderthal ancestry in present-day humans. *Nature* **507**, 354–357 (2014). [Medline doi:10.1038/nature12961](#)
  39. B. Vernot, J. M. Akey, Resurrecting surviving Neandertal lineages from modern human genomes. *Science* **343**, 1017–1021 (2014). [Medline doi:10.1126/science.1245938](#)
  40. Q. Fu, H. Li, P. Moorjani, F. Jay, S. M. Slepchenko, A. A. Bondarev, P. L. Johnson, A. Aximu-Petri, K. Prüfer, C. de Filippo, M. Meyer, N. Zwyns, D. C. Salazar-García, Y. V. Kuzmin, S. G. Keates, P. A. Kosintsev, D. I. Razhev, M. P. Richards, N. V. Peristov, M. Lachmann, K. Douka, T. F. Higham, M. Slatkin, J. J. Hublin, D. Reich, J. Kelso, T. B. Viola, S. Pääbo, Genome sequence of a 45,000-year-old modern human from western Siberia. *Nature* **514**, 445–449 (2014). [Medline doi:10.1038/nature13810](#)
  41. W. W. Howells, *Skull Shapes and the Map: Craniometric Analyses in the Dispersion of Modern Homo* (Harvard Univ. Press, Cambridge, 1989), Peabody Museum of Archaeology and Ethnology.

42. R. A. Foley, M. M. Lahr, Mode 3 technologies and the evolution of modern humans. *Camb. Archaeol. J.* **7**, 3–36 (1997). [doi:10.1017/S0959774300001451](https://doi.org/10.1017/S0959774300001451)
43. N. A. Rosenberg, J. K. Pritchard, J. L. Weber, H. M. Cann, K. K. Kidd, L. A. Zhivotovsky, M. W. Feldman, Genetic structure of human populations. *Science* **298**, 2381–2385 (2002). [Medline doi:10.1126/science.1078311](https://pubmed.ncbi.nlm.nih.gov/1078311/)
44. Q. Fu, M. Meyer, X. Gao, U. Stenzel, H. A. Burbano, J. Kelso, S. Pääbo, DNA analysis of an early modern human from Tianyuan Cave, China. *Proc. Natl. Acad. Sci. U.S.A.* **110**, 2223–2227 (2013). [Medline doi:10.1073/pnas.1221359110](https://pubmed.ncbi.nlm.nih.gov/22213591/)
45. L. L. Cavalli-Sforza, P. Menozzi, A. Piazza, *The History and Geography of Human Genes* (Princeton Univ. Press, Princeton, N.J., Abridged edition., 1996).
46. M. V. Anikovitch, V. V. Popov, N. I. Platonova, *\emph{Paleolit Kostënkovsko-Borshchëvskogo Raiona v Kontekste Verkhnego Paleolita Evropy} [\emph{Paleolithic of the Kostenki-Boroshchevo Region in the Context of the Upper Paleolithic of Europe}]* (Izdatel'stvo "Nestor-Istoriia," Sankt-Peterburg, 2008).
47. J. F. Hoffecker, M. V. Anikovitch, Kostenki: Geography and Culture. *Encycl. Glob. Archaeol.*, 4319–4323 (2014).
48. V. T. Holliday, J. F. Hoffecker, P. Goldberg, R. I. Macphail, S. L. Forman, M. Anikovich, A. Sinitsyn, Geoarchaeology of the Kostenki–Borshchevo Sites, Don River Valley, Russia. *Geoarchaeology* **22**, 181–228 (2007). [doi:10.1002/gea.20163](https://doi.org/10.1002/gea.20163)
49. A. N. Rogachev, *The Multilevel Sites of the Kostenki-Borshevo Region on the Don and the Problem of the Development of Culture in the Upper Paleolithic Epoch on the Russian Plain (in Russian)*. (Akademiya Nauk SSSR, Moscow-Leningrad, 1957), *Materials and Researches on the Archaeology of the USSR*.
50. R. G. Klein, *Man and Culture in the Late Pleistocene: A Case Study* (Chandler, San Francisco, 1969).
51. A. A. Sinitsyn, Kostenki 14 (markina gora): Data, problems, and perspectives. *Préhistoire Eur.* **9**, 273–313 (1996).
52. P. Haesaerts, F. Damblon, A. Sinitsyn, *Kostienki 14 (Voronezh, Central Russia): new data on stratigraphy and radiocarbon chronology* (BAR International Series 1240, 2004; [http://scholar.google.com/scholar?q=related:BL07o7M2dioJ:scholar.google.com/&hl=en&num=20&as\\_sdt=0,5](http://scholar.google.com/scholar?q=related:BL07o7M2dioJ:scholar.google.com/&hl=en&num=20&as_sdt=0,5)).
53. A. A. Velichko, V. V. Pisareva, S. N. Sedov, A. A. Sinitsyn, S. N. Timireva, aleogeography of kostenki-14 (markina gora). *Archaeol. Ethnol. Anthropol. Eurasia* **37**, 35–50 (2009). [doi:10.1016/j.aeae.2010.02.002](https://doi.org/10.1016/j.aeae.2010.02.002)
54. G. I. Lazukov, in *Paleolit Kostenkovsko-Borshchevskogo Raiona na Donu 1879-1979*, N. D. Praslov, A. N. Rogachev, Eds. (Nauka, Leningrad, 1982), pp. 13–37.
55. J. F. Hoffecker, V. T. Holliday, M. V. Anikovich, A. A. Sinitsyn, V. V. Popov, S. N. Lisitsyn, G. M. Levkovskaya, G. A. Pospelova, S. L. Forman, B. Giaccio, From the Bay of Naples to the River Don: The Campanian Ignimbrite eruption and the Middle to Upper Paleolithic transition in Eastern Europe. *J. Hum. Evol.* **55**, 858–870 (2008). [Medline doi:10.1016/j.jhevol.2008.08.018](https://pubmed.ncbi.nlm.nih.gov/1808018/)

56. B. De Vivo, G. Rolandi, P. B. Gans, A. Calvert, W. A. Bohrson, F. J. Spera, H. E. Belkin, New constraints on the pyroclastic eruptive history of the Campanian volcanic Plain (Italy). *Mineral. Petrol.* **73**, 47–65 (2001). [doi:10.1007/s007100170010](https://doi.org/10.1007/s007100170010)
57. B. Giaccio, I. Hadjas, M. Peresani, F. G. Fedele, R. Isaia, in *When Neanderthals and Modern Humans Met*, N. J. Conard, Ed. (Verlag, Tübingen, 2006).
58. A. A. Sinitsyn, N. D. Praslov, Y. S. Svezhentsev, L. D. Sulerzhitskii, in *Radiouglerodnaya Khronologiya Paleolita Vostochnoi Evropy i Severnoi Azii. Problemy i Perspektivy*, A. A. Sinitsyn, N. D. Praslov, Eds. (Russian Academy of Sciences, St Petersburg, 1997), pp. 21–66.
59. M. V. Anikovich, The formation of Upper Paleolithic cultures and anatomically modern humans : The East European perspective. *Anthropologie* **37**, 115–123 (1999).
60. A. A. Sinitsyn, in *Mitteilungen der Prähistorischen Kommission: Vol. 72. New aspects of the central and eastern european upper palaeolithic - methods, chronology, technology and subsistence*, C. Neugebauer-Maresch, L. R. Owen, Eds. (Österreichische Akademie der Wissenschaften, Vienna, 2010), pp. 27–48.
61. P. P. Efimenko, *Kostenki I* (Akademiya Nauk SSSR, Moscow, 1958).
62. A. N. Rogachev, A. A. Sinitsyn, in *Paleolit Kostenkovsko-Borshchevskogo Raiona na Donu 1879-1979*, N. D. Praslov, A. N. Rogachev, Eds. (Akademiya Nauk SSSR, Leningrad, 1982), pp. 145–162.
63. J. F. Hoffecker, *Desolate Landscapes: Ice-Age Settlement in Eastern Europe* (Rutgers University Press, New Brunswick, 2002; <http://books.google.com/books?hl=en&lr=&id=nXuqgInMOXIC&oi=fnd&pg=PR10&dq=Desolate+Landscapes+Ice+Age+settlement+in+Eastern+Europe&ots=UnqhIqMDGH&sig=s-iNIXf0ywYFPoXlm9y9DSTiZsY>).
64. J. F. Hoffecker, I. E. Kuz'mina, E. V. Syromyatnikova, M. V. Anikovich, A. A. Sinitsyn, V. V. Popov, V. T. Holliday, Evidence for kill-butcher events of early Upper Paleolithic age at Kostenki, Russia. *J. Archaeol. Sci.* **37**, 1073–1089 (2010). [doi:10.1016/j.jas.2009.12.008](https://doi.org/10.1016/j.jas.2009.12.008)
65. A. A. Sinitsyn, in *Acts of the XIVth UISPP Congress (Lie`ge, 2001). General Sessions and Posters. Section 6. The Upper Paleolithic*, M. Dewez, P. Noiret, E. Teheux, Eds. (British Archaeological Reports International Series, Oxford, 2004), pp. 181–190.
66. A. A. Sinitsyn, A. Palaeolithic, “Pompeii” at Kostenki, Russia. *Antiquity* **77**, 9–214 (2003).
67. A. A. Sinitsyn, in *Mitteilungen der Prähistorischen Kommission: Vol. 72. New aspects of the central and eastern european upper palaeolithic - methods, chronology, technology and subsistence*, C. Neugebauer-Maresch, L. R. Owen, Eds. (Österreichische Akademie der Wissenschaften, Vienna, 2010), pp. 27–48.
68. J. F. Hoffecker, The early upper Paleolithic of eastern Europe reconsidered. *Evol. Anthropol.* **20**, 24–39 (2011). [Medline doi:10.1002/evan.20284](https://pubmed.ncbi.nlm.nih.gov/220284/)
69. P. R. Nigst, *The Early Upper Palaeolithic of the Middle Danube Region* (Leiden University Press, Leiden, 2012; <http://books.google.co.uk/books?id=q->

[PhuQAACAAJ&dq=intitle:The+Early+Upper+Palaeolithic+of+the+Middle+Danube+region&hl=&cd=1&source=gbs\\_api](#)).

70. J.-J. Hublin, The modern human colonization of western Eurasia: When and where? *Quat. Sci. Rev.* DOI:10.1016/j.quascirev.2014.08.011 (2014) (available at <http://www.sciencedirect.com/science/article/pii/S0277379114003254>).
71. S. L. Kuhn, M. C. Stiner, E. Güleş, Initial Upper Palaeolithic in south-central Turkey and its regional context: A preliminary report. *Antiquity* **73**, 505–517 (1999).
72. G. B. Tostevin, thesis, Harvard University, Cambridge, Massachusetts (2000).
73. O. Bar-Yosef, in *When Neanderthals and modern humans met*, N. J. Conard, Ed. (Verlag, Tübingen, 2006), pp. 467–482.
74. J. F. Hoffecker, The spread of modern humans in Europe. *Proc. Natl. Acad. Sci. U.S.A.* **106**, 16040–16045 (2009). [Medline doi:10.1073/pnas.0903446106](#)
75. U. C. Müller, J. Pross, P. C. Tzedakis, C. Gamble, U. Kotthoff, G. Schmiedl, S. Wulf, K. Christanis, The role of climate in the spread of modern humans into Europe. *Quat. Sci. Rev.* **30**, 273–279 (2011). [doi:10.1016/j.quascirev.2010.11.016](#)
76. G. B. Tostevin, *Seeing Lithics: A Middle-Range Theory for Testing for Cultural Transmission in the Pleistocene* (Oxbow Books, Oxford, 2012).
77. G. F. Debets, Paleoanthropological finds at Kostenki. *Sov. Etnogr.* **1**, 43–53 (1955).
78. P. Mellars, *The Neanderthal Legacy: An Archaeological Perspective from Western Europe* (Princeton Univ. Press, Princeton, 1996).
79. W. Davies, Palaeoanthropology: The time of the last Neanderthals. *Nature* **512**, 260–261 (2014). [Medline doi:10.1038/512260a](#)
80. T. Higham, K. Douka, R. Wood, C. B. Ramsey, F. Brock, L. Basell, M. Camps, A. Arrizabalaga, J. Baena, C. Barroso-Ruiz, C. Bergman, C. Boitard, P. Boscato, M. Caparrós, N. J. Conard, C. Draily, A. Froment, B. Galván, P. Gambassini, A. Garcia-Moreno, S. Grimaldi, P. Haesaerts, B. Holt, M. J. Iriarte-Chiapusso, A. Jelinek, J. F. Jordá Pardo, J. M. Maíllo-Fernández, A. Marom, J. Maroto, M. Menéndez, L. Metz, E. Morin, A. Moroni, F. Negrino, E. Panagopoulou, M. Peresani, S. Pirson, M. de la Rasilla, J. Riel-Salvatore, A. Ronchitelli, D. Santamaria, P. Semal, L. Slimak, J. Soler, N. Soler, A. Villaluenga, R. Pinhasi, R. Jacobi, The timing and spatiotemporal patterning of Neanderthal disappearance. *Nature* **512**, 306–309 (2014). [Medline doi:10.1038/nature13621](#)
81. C. Finlayson, F. G. Pacheco, J. Rodríguez-Vidal, D. A. Fa, J. M. Gutierrez López, A. Santiago Pérez, G. Finlayson, E. Allue, J. Baena Preysler, I. Cáceres, J. S. Carrión, Y. Fernández Jalvo, C. P. Gleed-Owen, F. J. Jimenez Espejo, P. López, J. A. López Sáez, J. A. Riquelme Cantal, A. Sánchez Marco, F. G. Guzman, K. Brown, N. Fuentes, C. A. Valarino, A. Villalpando, C. B. Stringer, F. Martinez Ruiz, T. Sakamoto, Late survival of Neanderthals at the southernmost extreme of Europe. *Nature* **443**, 850–853 (2006). [Medline doi:10.1038/nature05195](#)



82. G. B. Tostevin, in *More than meets the eye. Studies on Upper Palaeolithic Diversity in the Near East*, A. N. Goring-Morris, A. Belfer-Cohen, Eds. (Oxbow Books, Oxford, 2003), pp. 54–67.
83. D. Richter, G. Tostevin, P. Skrdla, Bohunician technology and thermoluminescence dating of the type locality of Brno-Bohunice (Czech Republic). *J. Hum. Evol.* **55**, 871–885 (2008). [Medline](#) [doi:10.1016/j.jhevol.2008.04.008](#)
84. C. C. Szmidt, C. Normand, G. S. Burr, G. W. L. Hodgins, S. LaMotta, AMS 14C dating the Protoaurignacian/Early Aurignacian of Isturitz, France. Implications for Neanderthal-modern human interaction and the timing of technical and cultural innovations in Europe. *J. Archaeol. Sci.* **37**, 758–768 (2010). [doi:10.1016/j.jas.2009.11.006](#)
85. T. Goebel, A. P. Derevianko, V. T. Petrin, Dating the middle-to-upper-paleolithic transition at Kara-Bom. *Curr. Anthropol.* **34**, 452–458 (1993). [doi:10.1086/204192](#)
86. N. Zwyns, *Laminar technology and the onset of the Upper Paleolithic in the Altai, Siberia* (Leiden University Press, Leiden, 2012).
87. T. Goebel, M. Aksenov, Accelerator radiocarbon dating of the initial Upper Paleolithic in southeast Siberia. *Antiquity* **69**, 349–357 (1995).
88. S. L. Kuhn, N. Zwyns, Rethinking the initial Upper Paleolithic. *Quat. Int.* **347**, 29–38 (2014). [doi:10.1016/j.quaint.2014.05.040](#)
89. T. Goebel, Anthropology. The missing years for modern humans. *Science* **315**, 194–196 (2007). [Medline](#) [doi:10.1126/science.1137564](#)
90. F. Bon, L’Aurignacien entre mer et Océan. Réflexion sur l’unité des phases anciennes de l’Aurignacien dans le sud de la France. *Mém. Société Préhistorique Fr.* **10**, 253 (2002).
91. J.-L. Guadelli *et al.*, in *Les premiers peuplements en Europe. Actes du Colloque international : Données récentes sur les modalités de peuplement et sur le cadre chronostratigraphique, géologique et paléogéographique des industries du Paléolithique ancien et moyen en Europe*, N. Molines, M. H. Moncel, J. L. Monnier, Eds. (Université de Rennes, Rennes, 2005; <http://halshs.archives-ouvertes.fr/halshs-00136044>), pp. 87–103.
92. K. Douka, C. A. Bergman, R. E. M. Hedges, F. P. Wesselingh, T. F. G. Higham, Chronology of Ksar Akil (Lebanon) and implications for the colonization of Europe by anatomically modern humans. *PLOS ONE* **8**, e72931 (2013). [Medline](#) [doi:10.1371/journal.pone.0072931](#)
93. M. Otte *et al.*, The Aurignacian in the Zagros region: New research at Yafteh cave, Lorestan, Iran. *Antiquity* **81**, 82–96 (2007).
94. T. Tsanova, N. Zwyns, L. Eizenberg, N. Teyssandier, F. Le Brun-Ricalens, M. Otte, Le plus petit dénominateur commun: Réflexion sur la variabilité des ensembles lamellaires du Paléolithique supérieur ancien d’Eurasie. Un bilan autour des exemples de Kozarnika (Est des Balkans) et Yafteh (Zagros central). *Anthropologie* **116**, 469–509 (2012). [doi:10.1016/j.anthro.2011.10.005](#)

95. M. Vanhaeren, F. d'Errico, Aurignacian ethno-linguistic geography of Europe revealed by personal ornaments. *J. Archaeol. Sci.* **33**, 1105–1128 (2006).  
[doi:10.1016/j.jas.2005.11.017](https://doi.org/10.1016/j.jas.2005.11.017)
96. V. Borgia, F. Ranaldo, A. Ronchitelli, U. Wierer, in *À la recherche des identités gravettiennes: Actualités, questionnements et perspectives: Actes de la table ronde sur le Gravettien en France et dans les pays limitrophes, Aix-en-Provence, 6-8 Octobre 2008*, N. Goutas, L. Klaric, D. Pesesse, P. Guillermin, Eds. (Société préhistorique française, Paris, 2011), *Mémoires de la Société préhistorique française*; **52**, pp. 161–174.
97. D. Henry-Gambier, D. Sacchi, V.-V. I. La Crouzade, (Aude, France) : Un des plus anciens fossiles d'anatomie moderne en Europe occidentale. *Bull. Mem. Soc. Anthropol. Paris* **20**, 79–104 (2008).
98. W. Davies, R. E. M. Hedges, Dating a type site: Fitting Szeleta cave into its regional chronometric context. *Praehistorische Zeitschrift* **9-10**, 35–45 (2008).
99. F. V. Ramírez Rozzi, F. d'Errico, M. Vanhaeren, P. M. Grootes, B. Kerautret, V. Dujardin, Cutmarked human remains bearing Neandertal features and modern human remains associated with the Aurignacian at Les Rois. *J. Anthropol. Sci.* **87**, 153–185 (2009).  
[Medline](#)
100. E. Alexandrescu, A. Olariu, G. Skog, K. Stenstrom, R. Hellborg, Human fossil bones from the Muierii Cave and the Cioclovina Cave, Romania. *Anthropologie* **114**, 341–353 (2010). [doi:10.1016/j.anthro.2010.05.004](https://doi.org/10.1016/j.anthro.2010.05.004)
101. T. Goebel, in *Emergence and Diversity of Modern Human Behavior in Paleolithic Asia*, Y. Kaifu, M. Izuhara, T. Goebel, H. Sato, A. Ono, Eds. (Texas A&M University Press, College Station, 2014), pp. 437–452.
102. F. Li, S. L. Kuhn, X. Gao, F. Y. Chen, Re-examination of the dates of large blade technology in China: A comparison of Shuidonggou Locality 1 and Locality 2. *J. Hum. Evol.* **64**, 161–168 (2013). [Medline](#) [doi:10.1016/j.jhevol.2012.11.001](https://doi.org/10.1016/j.jhevol.2012.11.001)
103. F. Li *et al.*, The development of Upper Palaeolithic China: New results from the Shuidonggou site. *Antiquity* **87**, 368–383 (2013).
104. S. Hughes, T. J. Hayden, C. J. Douady, C. Tougaard, M. Germonpré, A. Stuart, L. Lbova, R. F. Carden, C. Hänni, L. Say, Molecular phylogeny of the extinct giant deer, *Megaloceros giganteus*. *Mol. Phylogenet. Evol.* **40**, 285–291 (2006). [Medline](#)  
[doi:10.1016/j.ympev.2006.02.004](https://doi.org/10.1016/j.ympev.2006.02.004)
105. S. A. Gladyshev, J. W. Olsen, A. V. Tabarev, Y. V. Kuzmin, Chronology and periodization of Upper Paleolithic sites in Mongolia. *Archaeol. Ethnol. Anthropol. Eurasia* **38**, 33–40 (2010). [doi:10.1016/j.aear.2010.10.003](https://doi.org/10.1016/j.aear.2010.10.003)
106. C. Morgan *et al.*, Redating Shuidonggou Locality 1 and Implications for the Initial Upper Paleolithic in East Asia. *Radiocarbon* **56**, 165–179 (2014). [doi:10.2458/56.16270](https://doi.org/10.2458/56.16270)
107. F. T. Goebel, The Middle to Upper Paleolithic Transition in Siberia. *Anthropol. Pap. Univ. Alsk.* **26**, 94–113 (2003).
108. P. J. Brantingham, S. L. Kuhn, K. W. Kerry, *The Early Upper Paleolithic beyond Western Europe* (University of California Press, Los Angeles, 2004).

109. O. Bar-Yosef, Y. Wang, Paleolithic Archeology in China. *Annu. Rev. Anthropol.* **41**, 319–335 (2012). [doi:10.1146/annurev-anthro-092611-145832](https://doi.org/10.1146/annurev-anthro-092611-145832)
110. I. Buvit, K. Terry, M. Izuhu, in *Emergence and Diversity of Modern Human Behavior in Paleolithic Asia*, Y. Kaifu, M. Izuhu, T. Goebel, H. Sato, A. Ono, Eds. (Texas A&M University Press, College Station, 2014), pp. 490–505.
111. K. Terry, thesis, Washington State University (2010).
112. Y. Kaifu, *Emergence and Diversity of Modern Human Behavior in Paleolithic Asia* (Texas A&M University Press, 2014; <http://books.google.dk/books?id=88-6oAEACAAJ>).
113. Y. V. Kuzmin, P. A. Kosintsev, D. I. Razhev, G. W. L. Hodgins, The oldest directly-dated human remains in Siberia: AMS 14C age of talus bone from the Baigara locality, West Siberian Plain. *J. Hum. Evol.* **57**, 91–95 (2009). [Medline](https://pubmed.ncbi.nlm.nih.gov/19254441/) [doi:10.1016/j.jhevol.2009.04.003](https://doi.org/10.1016/j.jhevol.2009.04.003)
114. N. Zwyns, D. Flas, in *Les Aurignaciens*, M. Otte, Ed. (Editions Errance, Paris, 2010), pp. 271–295.
115. W. Davies, P. J. Gollop, in *Neanderthals and Modern Humans in the European Landscape during the Last Glaciation*, T. H. van Andel, W. Davies, Eds. (McDonald Institute for Archaeological Research, Cambridge, 2003), pp. 131–146.
116. K. E. Graf, “The Good, the Bad, and the Ugly”: Evaluating the radiocarbon chronology of the middle and late Upper Paleolithic in the Enisei River valley, south-central Siberia. *J. Archaeol. Sci.* **37**, 210–223 (2009). [doi:10.1016/j.jas.2009.09.034](https://doi.org/10.1016/j.jas.2009.09.034)
117. K. E. Graf, Hunter–gatherer dispersals in the mammoth-steppe: Technological provisioning and land-use in the Enisei River valley, south-central Siberia. *J. Archaeol. Sci.* **37**, 210–223 (2010). [doi:10.1016/j.jas.2009.09.034](https://doi.org/10.1016/j.jas.2009.09.034)
118. C. G. Turner 2nd, Teeth and prehistory in Asia. *Sci. Am.* **260**, 88–96 (1989). [Medline](https://pubmed.ncbi.nlm.nih.gov/10000000/) [doi:10.1038/scientificamerican0289-88](https://doi.org/10.1038/scientificamerican0289-88)
119. M. Mussi, J. Cinq-Mars, P. Bolduc, Echoes from the mammoth steppe: the case of the Balzi Rossi. *Univ. Leiden*, 106–124 (2000).
120. M. Raghavan, P. Skoglund, K. E. Graf, M. Metspalu, A. Albrechtsen, I. Moltke, S. Rasmussen, T. W. Stafford Jr., L. Orlando, E. Metspalu, M. Karmin, K. Tambets, S. Rootsi, R. Mägi, P. F. Campos, E. Balanovska, O. Balanovsky, E. Khusnutdinova, S. Litvinov, L. P. Osipova, S. A. Fedorova, M. I. Voevoda, M. DeGiorgio, T. Sicheritz-Ponten, S. Brunak, S. Demeshchenko, T. Kivisild, R. Villems, R. Nielsen, M. Jakobsson, E. Willerslev, Upper Palaeolithic Siberian genome reveals dual ancestry of Native Americans. *Nature* **505**, 87–91 (2014). [Medline](https://pubmed.ncbi.nlm.nih.gov/25026031/) [doi:10.1038/nature12736](https://doi.org/10.1038/nature12736)
121. R. A. Housley, C. S. Gamble, M. Street, P. Pettitt, Radiocarbon evidence for the Lateglacial Human Recolonisation of Northern Europe. *Proc. Prehist. Soc.* **63**, 25–54 (1997). [doi:10.1017/S0079497X0000236X](https://doi.org/10.1017/S0079497X0000236X)
122. C. Gamble, W. Davies, P. Pettitt, M. Richards, Climate change and evolving human diversity in Europe during the last glacial. *Philos. Trans. R. Soc. Lond. B Biol. Sci.* **359**, 243–254 (2004). [Medline](https://pubmed.ncbi.nlm.nih.gov/15344441/) [doi:10.1098/rstb.2003.1396](https://doi.org/10.1098/rstb.2003.1396)



123. M. Mirazon Lahr, R. A. Foley, R. Pinhasi, in *Archaeogenetics: DNA and the population prehistory of Europe*, C. Renfrew, K. Boyle, Eds. (McDonald Institute for Archaeological Research, Cambridge, 2000), pp. 81–88.
124. J. Krause, T. Unger, A. Noğon, A. S. Malaspinas, S. O. Kolokotronis, M. Stiller, L. Soibelzon, H. Spriggs, P. H. Dear, A. W. Briggs, S. C. Bray, S. J. O'Brien, G. Rabeder, P. Matheus, A. Cooper, M. Slatkin, S. Pääbo, M. Hofreiter, Mitochondrial genomes reveal an explosive radiation of extinct and extant bears near the Miocene-Pliocene boundary. *BMC Evol. Biol.* **8**, 220 (2008). [Medline](#) [doi:10.1186/1471-2148-8-220](#)
125. L. Orlando, A. Ginolhac, G. Zhang, D. Froese, A. Albrechtsen, M. Stiller, M. Schubert, E. Cappellini, B. Petersen, I. Moltke, P. L. Johnson, M. Fumagalli, J. T. Vilstrup, M. Raghavan, T. Korneliussen, A. S. Malaspinas, J. Vogt, D. Szklarczyk, C. D. Kelstrup, J. Vinther, A. Dolocan, J. Stenderup, A. M. Velazquez, J. Cahill, M. Rasmussen, X. Wang, J. Min, G. D. Zazula, A. Seguin-Orlando, C. Mortensen, K. Magnussen, J. F. Thompson, J. Weinstock, K. Gregersen, K. H. Røed, V. Eisenmann, C. J. Rubin, D. C. Miller, D. F. Antczak, M. F. Bertelsen, S. Brunak, K. A. Al-Rasheid, O. Ryder, L. Andersson, J. Mundy, A. Krogh, M. T. Gilbert, K. Kjær, T. Sicheritz-Ponten, L. J. Jensen, J. V. Olsen, M. Hofreiter, R. Nielsen, B. Shapiro, J. Wang, E. Willerslev, Recalibrating Equus evolution using the genome sequence of an early Middle Pleistocene horse. *Nature* **499**, 74–78 (2013). [Medline](#) [doi:10.1038/nature12323](#)
126. B. Llamas, M. L. Holland, K. Chen, J. E. Cropley, A. Cooper, C. M. Suter, High-resolution analysis of cytosine methylation in ancient DNA. *PLOS ONE* **7**, e30226 (2012). [Medline](#) [doi:10.1371/journal.pone.0030226](#)
127. O. Smith, A. J. Clapham, P. Rose, Y. Liu, J. Wang, R. G. Allaby, Genomic methylation patterns in archaeological barley show de-methylation as a time-dependent diagenetic process. *Sci. Rep.* **4**, 5559 (2014). [10.1038/srep05559](#) [Medline](#) [doi:10.1038/srep05559](#)
128. D. Gokhman, E. Lavi, K. Prüfer, M. F. Fraga, J. A. Riancho, J. Kelso, S. Pääbo, E. Meshorer, L. Carmel, Reconstructing the DNA methylation maps of the Neandertal and the Denisovan. *Science* **344**, 523–527 (2014). [Medline](#) [doi:10.1126/science.1250368](#)
129. A. W. Briggs *et al.*, Removal of deaminated cytosines and detection of in vivo methylation in ancient DNA. *Nucleic Acids Res.* **38**, e87 (2009). [Medline](#)
130. A. Seguin-Orlando, M. Schubert, J. Clary, J. Stagegaard, M. T. Alberdi, J. L. Prado, A. Prieto, E. Willerslev, L. Orlando, Ligation bias in illumina next-generation DNA libraries: Implications for sequencing ancient genomes. *PLOS ONE* **8**, e78575 (2013). [Medline](#) [doi:10.1371/journal.pone.0078575](#)
131. M. Meyer, M. Kircher, Illumina sequencing library preparation for highly multiplexed target capture and sequencing. *Cold Spring Harb. Protoc.* **2010**, pdb.prot5448 (2010).
132. J. T. Vilstrup, A. Seguin-Orlando, M. Stiller, A. Ginolhac, M. Raghavan, S. C. Nielsen, J. Weinstock, D. Froese, S. K. Vasiliev, N. D. Ovodov, J. Clary, K. M. Helgen, R. C. Fleischer, A. Cooper, B. Shapiro, L. Orlando, Mitochondrial phylogenomics of modern and ancient equids. *PLOS ONE* **8**, e55950 (2013). [Medline](#) [doi:10.1371/journal.pone.0055950](#)

133. M. Schubert, L. Ermini, C. Der Sarkissian, H. Jónsson, A. Ginolhac, R. Schaefer, M. D. Martin, R. Fernández, M. Kircher, M. McCue, E. Willerslev, L. Orlando, Characterization of ancient and modern genomes by SNP detection and phylogenomic and metagenomic analysis using PALEOMIX. *Nat. Protoc.* **9**, 1056–1082 (2014). [Medline](#) [doi:10.1038/nprot.2014.063](#)
134. M. Schubert, A. Ginolhac, S. Lindgreen, J. F. Thompson, K. A. Al-Rasheid, E. Willerslev, A. Krogh, L. Orlando, Improving ancient DNA read mapping against modern reference genomes. *BMC Genomics* **13**, 178 (2012). [Medline](#) [doi:10.1186/1471-2164-13-178](#)
135. S. Lindgreen, AdapterRemoval: Easy cleaning of next-generation sequencing reads. *BMC Res. Notes* **5**, 337 (2012). [Medline](#) [doi:10.1186/1756-0500-5-337](#)
136. H. Li, R. Durbin, Fast and accurate short read alignment with Burrows-Wheeler transform. *Bioinformatics* **25**, 1754–1760 (2009). [Medline](#) [doi:10.1093/bioinformatics/btp324](#)
137. A. McKenna, M. Hanna, E. Banks, A. Sivachenko, K. Cibulskis, A. Kernysky, K. Garimella, D. Altshuler, S. Gabriel, M. Daly, M. A. DePristo, The Genome Analysis Toolkit: A MapReduce framework for analyzing next-generation DNA sequencing data. *Genome Res.* **20**, 1297–1303 (2010). [Medline](#) [doi:10.1101/gr.107524.110](#)
138. H. Jónsson, A. Ginolhac, M. Schubert, P. L. F. Johnson, L. Orlando, mapDamage2.0: Fast approximate Bayesian estimates of ancient DNA damage parameters. *Bioinformatics* **29**, 1682–1684 (2013). [Medline](#) [doi:10.1093/bioinformatics/btt193](#)
139. H. Li, B. Handsaker, A. Wysoker, T. Fennell, J. Ruan, N. Homer, G. Marth, G. Abecasis, R. Durbin; 1000 Genome Project Data Processing Subgroup, The Sequence Alignment/Map format and SAMtools. *Bioinformatics* **25**, 2078–2079 (2009). [Medline](#) [doi:10.1093/bioinformatics/btp352](#)
140. Q. Fu, A. Mitnik, P. L. Johnson, K. Bos, M. Lari, R. Bollongino, C. Sun, L. Giemsch, R. Schmitz, J. Burger, A. M. Ronchitelli, F. Martini, R. G. Cremonesi, J. Svoboda, P. Bauer, D. Caramelli, S. Castellano, D. Reich, S. Pääbo, J. Krause, A revised timescale for human evolution based on ancient mitochondrial genomes. *Curr. Biol.* **23**, 553–559 (2013). [Medline](#) [doi:10.1016/j.cub.2013.02.044](#)
141. D. Reich, R. E. Green, M. Kircher, J. Krause, N. Patterson, E. Y. Durand, B. Viola, A. W. Briggs, U. Stenzel, P. L. Johnson, T. Maricic, J. M. Good, T. Marques-Bonet, C. Alkan, Q. Fu, S. Mallick, H. Li, M. Meyer, E. E. Eichler, M. Stoneking, M. Richards, S. Talamo, M. V. Shunkov, A. P. Derevianko, J. J. Hublin, J. Kelso, M. Slatkin, S. Pääbo, Genetic history of an archaic hominin group from Denisova Cave in Siberia. *Nature* **468**, 1053–1060 (2010). [Medline](#) [doi:10.1038/nature09710](#)
142. K. A. Frazer, D. G. Ballinger, D. R. Cox, D. A. Hinds, L. L. Stuve, R. A. Gibbs, J. W. Belmont, A. Boudreau, P. Hardenbol, S. M. Leal, S. Pasternak, D. A. Wheeler, T. D. Willis, F. Yu, H. Yang, C. Zeng, Y. Gao, H. Hu, W. Hu, C. Li, W. Lin, S. Liu, H. Pan, X. Tang, J. Wang, W. Wang, J. Yu, B. Zhang, Q. Zhang, H. Zhao, H. Zhao, J. Zhou, S. B. Gabriel, R. Barry, B. Blumenstiel, A. Camargo, M. Defelice, M. Faggart, M. Goyette, S. Gupta, J. Moore, H. Nguyen, R. C. Onofrio, M. Parkin, J. Roy, E. Stahl, E. Winchester, L. Ziaugra, D. Altshuler, Y. Shen, Z. Yao, W. Huang, X. Chu, Y. He, L. Jin, Y. Liu, Y. Shen, W. Sun, H. Wang, Y. Wang, Y. Wang, X. Xiong, L. Xu, M. M. Waye, S. K. Tsui, H. Xue, J. T. Wong, L. M. Galver, J. B. Fan, K. Gunderson, S. S. Murray, A. R. Oliphant,

- M. S. Chee, A. Montpetit, F. Chagnon, V. Ferretti, M. Leboeuf, J. F. Olivier, M. S. Phillips, S. Roumy, C. Sallée, A. Verner, T. J. Hudson, P. Y. Kwok, D. Cai, D. C. Koboldt, R. D. Miller, L. Pawlikowska, P. Taillon-Miller, M. Xiao, L. C. Tsui, W. Mak, Y. Q. Song, P. K. Tam, Y. Nakamura, T. Kawaguchi, T. Kitamoto, T. Morizono, A. Nagashima, Y. Ohnishi, A. Sekine, T. Tanaka, T. Tsunoda, P. Deloukas, C. P. Bird, M. Delgado, E. T. Dermitzakis, R. Gwilliam, S. Hunt, J. Morrison, D. Powell, B. E. Stranger, P. Whittaker, D. R. Bentley, M. J. Daly, P. I. de Bakker, J. Barrett, Y. R. Chretien, J. Maller, S. McCarroll, N. Patterson, I. Pe'er, A. Price, S. Purcell, D. J. Richter, P. Sabeti, R. Saxena, S. F. Schaffner, P. C. Sham, P. Varilly, D. Altshuler, L. D. Stein, L. Krishnan, A. V. Smith, M. K. Tello-Ruiz, G. A. Thorisson, A. Chakravarti, P. E. Chen, D. J. Cutler, C. S. Kashuk, S. Lin, G. R. Abecasis, W. Guan, Y. Li, H. M. Munro, Z. S. Qin, D. J. Thomas, G. McVean, A. Auton, L. Bottolo, N. Cardin, S. Eyheramendy, C. Freeman, J. Marchini, S. Myers, C. Spencer, M. Stephens, P. Donnelly, L. R. Cardon, G. Clarke, D. M. Evans, A. P. Morris, B. S. Weir, T. Tsunoda, J. C. Mullikin, S. T. Sherry, M. Feolo, A. Skol, H. Zhang, C. Zeng, H. Zhao, I. Matsuda, Y. Fukushima, D. R. Macer, E. Suda, C. N. Rotimi, C. A. Adebamowo, I. Ajayi, T. Aniagwu, P. A. Marshall, C. Nkwodimmah, C. D. Royal, M. F. Leppert, M. Dixon, A. Peiffer, R. Qiu, A. Kent, K. Kato, N. Niikawa, I. F. Adewole, B. M. Knoppers, M. W. Foster, E. W. Clayton, J. Watkin, R. A. Gibbs, J. W. Belmont, D. Muzny, L. Nazareth, E. Sodergren, G. M. Weinstock, D. A. Wheeler, I. Yakub, S. B. Gabriel, R. C. Onofrio, D. J. Richter, L. Ziaugra, B. W. Birren, M. J. Daly, D. Altshuler, R. K. Wilson, L. L. Fulton, J. Rogers, J. Burton, N. P. Carter, C. M. Clee, M. Griffiths, M. C. Jones, K. McLay, R. W. Plumb, M. T. Ross, S. K. Sims, D. L. Willey, Z. Chen, H. Han, L. Kang, M. Godbout, J. C. Wallenburg, P. L'Archevêque, G. Bellemare, K. Saeki, H. Wang, D. An, H. Fu, Q. Li, Z. Wang, R. Wang, A. L. Holden, L. D. Brooks, J. E. McEwen, M. S. Guyer, V. O. Wang, J. L. Peterson, M. Shi, J. Spiegel, L. M. Sung, L. F. Zacharia, F. S. Collins, K. Kennedy, R. Jamieson, J. Stewart; International HapMap Consortium, A second generation human haplotype map of over 3.1 million SNPs. *Nature* **449**, 851–861 (2007). [Medline doi:10.1038/nature06258](https://doi.org/10.1038/nature06258)
143. P. Francalacci, L. Morelli, A. Angius, R. Berutti, F. Reinier, R. Atzeni, R. Pili, F. Busonero, A. Maschio, I. Zara, D. Sanna, A. Useli, M. F. Urru, M. Marcelli, R. Cusano, M. Oppo, M. Zoledziewska, M. Pitzalis, F. Deidda, E. Porcu, F. Poddie, H. M. Kang, R. Lyons, B. Tarrier, J. B. Gresham, B. Li, S. Tofanelli, S. Alonso, M. Dei, S. Lai, A. Mulas, M. B. Whalen, S. Uzzau, C. Jones, D. Schlessinger, G. R. Abecasis, S. Sanna, C. Sidore, F. Cucca, Low-pass DNA sequencing of 1200 Sardinians reconstructs European Y-chromosome phylogeny. *Science* **341**, 565–569 (2013). [Medline doi:10.1126/science.1237947](https://doi.org/10.1126/science.1237947)
144. G. D. Poznik, B. M. Henn, M. C. Yee, E. Sliwerska, G. M. Euskirchen, A. A. Lin, M. Snyder, L. Quintana-Murci, J. M. Kidd, P. A. Underhill, C. D. Bustamante, Sequencing Y chromosomes resolves discrepancy in time to common ancestor of males versus females. *Science* **341**, 562–565 (2013). [Medline doi:10.1126/science.1237619](https://doi.org/10.1126/science.1237619)
145. International Society of Genetic Genealogy, *Int. Soc. Genet. Geneal.* (2014), (available at <http://www.isogg.org> Y-DNA Haplogroup Tree 2014, Version: 9.71).
146. J. Z. Li, D. M. Absher, H. Tang, A. M. Southwick, A. M. Casto, S. Ramachandran, H. M. Cann, G. S. Barsh, M. Feldman, L. L. Cavalli-Sforza, R. M. Myers, Worldwide human

- relationships inferred from genome-wide patterns of variation. *Science* **319**, 1100–1104 (2008). [Medline doi:10.1126/science.1153717](#)
147. J. Di Cristofaro, E. Pennarun, S. Mazières, N. M. Myres, A. A. Lin, S. A. Temori, M. Metspalu, E. Metspalu, M. Witzel, R. J. King, P. A. Underhill, R. Villems, J. Chiaroni, Afghan Hindu Kush: Where Eurasian sub-continent gene flows converge. *PLOS ONE* **8**, e76748 (2013). [Medline doi:10.1371/journal.pone.0076748](#)
  148. S. A. Fedorova, M. Reidla, E. Metspalu, M. Metspalu, S. Rootsi, K. Tambets, N. Trofimova, S. I. Zhadanov, B. Hooshiar Kashani, A. Olivieri, M. I. Voevoda, L. P. Osipova, F. A. Platonov, M. I. Tomsy, E. K. Khusnutdinova, A. Torroni, R. Villems, Autosomal and uniparental portraits of the native populations of Sakha (Yakutia): Implications for the peopling of Northeast Eurasia. *BMC Evol. Biol.* **13**, 127 (2013). [Medline doi:10.1186/1471-2148-13-127](#)
  149. B. Yunusbayev *et al.*, The Caucasus as an asymmetric semipermeable barrier to ancient human migrations. *Mol. Biol. Evol.* **29**, 359–365 (2011). [Medline](#)
  150. G. Chaubey *et al.*, Population genetic structure in Indian Austroasiatic speakers: The role of landscape barriers and sex-specific admixture. *Mol. Biol. Evol.* **28**, 1013–1024 (2010). [Medline](#)
  151. M. Rasmussen, Y. Li, S. Lindgreen, J. S. Pedersen, A. Albrechtsen, I. Moltke, M. Metspalu, E. Metspalu, T. Kivisild, R. Gupta, M. Bertalan, K. Nielsen, M. T. Gilbert, Y. Wang, M. Raghavan, P. F. Campos, H. M. Kamp, A. S. Wilson, A. Gledhill, S. Tridico, M. Bunce, E. D. Lorenzen, J. Binladen, X. Guo, J. Zhao, X. Zhang, H. Zhang, Z. Li, M. Chen, L. Orlando, K. Kristiansen, M. Bak, N. Tommerup, C. Bendixen, T. L. Pierre, B. Grønnow, M. Meldgaard, C. Andreasen, S. A. Fedorova, L. P. Osipova, T. F. Higham, C. B. Ramsey, T. V. Hansen, F. C. Nielsen, M. H. Crawford, S. Brunak, T. Sicheritz-Pontén, R. Villems, R. Nielsen, A. Krogh, J. Wang, E. Willerslev, Ancient human genome sequence of an extinct Palaeo-Eskimo. *Nature* **463**, 757–762 (2010). [Medline doi:10.1038/nature08835](#)
  152. M. Metspalu, I. G. Romero, B. Yunusbayev, G. Chaubey, C. B. Mallick, G. Hudjashov, M. Nelis, R. Mägi, E. Metspalu, M. Remm, R. Pitchappan, L. Singh, K. Thangaraj, R. Villems, T. Kivisild, Shared and unique components of human population structure and genome-wide signals of positive selection in South Asia. *Am. J. Hum. Genet.* **89**, 731–744 (2011). [Medline doi:10.1016/j.ajhg.2011.11.010](#)
  153. D. M. Behar, B. Yunusbayev, M. Metspalu, E. Metspalu, S. Rosset, J. Parik, S. Rootsi, G. Chaubey, I. Kutuev, G. Yudkovsky, E. K. Khusnutdinova, O. Balanovsky, O. Semino, L. Pereira, D. Comas, D. Gurwitz, B. Bonne-Tamir, T. Parfitt, M. F. Hammer, K. Skorecki, R. Villems, The genome-wide structure of the Jewish people. *Nature* **466**, 238–242 (2010). [Medline doi:10.1038/nature09103](#)
  154. I. Lazaridis, N. Patterson, A. Mittnik, G. Renaud, S. Mallick, K. Kirsanow, P. H. Sudmant, J. G. Schraiber, S. Castellano, M. Lipson, B. Berger, C. Economou, R. Bollongino, Q. Fu, K. I. Bos, S. Nordenfelt, H. Li, C. de Filippo, K. Prüfer, S. Sawyer, C. Posth, W. Haak, F. Hallgren, E. Fornander, N. Rohland, D. Delsate, M. Francken, J. M. Guinet, J. Wahl, G. Ayodo, H. A. Babiker, G. Bailliet, E. Balanovska, O. Balanovsky, R. Barrantes, G. Bedoya, H. Ben-Ami, J. Bene, F. Berrada, C. M. Bravi, F. Brisighelli, G. B. Busby, F.

- Cali, M. Churnosov, D. E. Cole, D. Corach, L. Damba, G. van Driem, S. Dryomov, J. M. Dugoujon, S. A. Fedorova, I. Gallego Romero, M. Gubina, M. Hammer, B. M. Henn, T. Hervig, U. Hodoglugil, A. R. Jha, S. Karachanak-Yankova, R. Khusainova, E. Khusnutdinova, R. Kittles, T. Kivisild, W. Klitz, V. Kučinskas, A. Kushniarevich, L. Laredj, S. Litvinov, T. Loukidis, R. W. Mahley, B. Melegh, E. Metspalu, J. Molina, J. Mountain, K. Näkkäläjärvi, D. Nesheva, T. Nyambo, L. Osipova, J. Parik, F. Platonov, O. Posukh, V. Romano, F. Rothhammer, I. Rudan, R. Ruizbakiev, H. Sahakyan, A. Sajantila, A. Salas, E. B. Starikovskaya, A. Tarekegn, D. Toncheva, S. Turdikulova, I. Uktveryte, O. Utevska, R. Vasquez, M. Villena, M. Voevoda, C. A. Winkler, L. Yepiskoposyan, P. Zalloua, T. Zemunik, A. Cooper, C. Capelli, M. G. Thomas, A. Ruiz-Linares, S. A. Tishkoff, L. Singh, K. Thangaraj, R. Villems, D. Comas, R. Sukernik, M. Metspalu, M. Meyer, E. E. Eichler, J. Burger, M. Slatkin, S. Pääbo, J. Kelso, D. Reich, J. Krause, Ancient human genomes suggest three ancestral populations for present-day Europeans. *Nature* **513**, 409–413 (2014). [Medline doi:10.1038/nature13673](#)
155. A. Keller, A. Graefen, M. Ball, M. Matzas, V. Boisguerin, F. Maixner, P. Leidinger, C. Backes, R. Khairat, M. Forster, B. Stade, A. Franke, J. Mayer, J. Spangler, S. McLaughlin, M. Shah, C. Lee, T. T. Harkins, A. Sartori, A. Moreno-Estrada, B. Henn, M. Sikora, O. Semino, J. Chiaroni, S. Rootsi, N. M. Myres, V. M. Cabrera, P. A. Underhill, C. D. Bustamante, E. E. Vigl, M. Samadelli, G. Cipollini, J. Haas, H. Katus, B. D. O'Connor, M. R. Carlson, B. Meder, N. Blin, E. Meese, C. M. Pusch, A. Zink, New insights into the Tyrolean Iceman's origin and phenotype as inferred by whole-genome sequencing. *Nat. Commun.* **3**, 698 (2012). [Medline doi:10.1038/ncomms1701](#)
156. M. Sikora, M. L. Carpenter, A. Moreno-Estrada, B. M. Henn, P. A. Underhill, F. Sánchez-Quinto, I. Zara, M. Pitzalis, C. Sidore, F. Busonero, A. Maschio, A. Angius, C. Jones, J. Mendoza-Revilla, G. Nekhrizov, D. Dimitrova, N. Theodossiev, T. T. Harkins, A. Keller, F. Maixner, A. Zink, G. Abecasis, S. Sanna, F. Cucca, C. D. Bustamante, Population genomic analysis of ancient and modern genomes yields new insights into the genetic ancestry of the Tyrolean Iceman and the genetic structure of Europe. *PLOS Genet.* **10**, e1004353 (2014). [Medline doi:10.1371/journal.pgen.1004353](#)
157. J. K. Pickrell, J. K. Pritchard, Inference of population splits and mixtures from genome-wide allele frequency data. *PLOS Genet.* **8**, e1002967 (2012). [Medline doi:10.1371/journal.pgen.1002967](#)
158. J. C. Dohm, C. Lottaz, T. Borodina, H. Himmelbauer, Substantial biases in ultra-short read data sets from high-throughput DNA sequencing. *Nucleic Acids Res.* **36**, e105 (2008). [Medline doi:10.1093/nar/gkn425](#)
159. K. Nakamura, T. Oshima, T. Morimoto, S. Ikeda, H. Yoshikawa, Y. Shiwa, S. Ishikawa, M. C. Linak, A. Hirai, H. Takahashi, M. Altaf-Ul-Amin, N. Ogasawara, S. Kanaya, Sequence-specific error profile of Illumina sequencers. *Nucleic Acids Res.* **39**, e90 (2011). [Medline doi:10.1093/nar/gkr344](#)
160. R. R. Hudson, Generating samples under a Wright-Fisher neutral model of genetic variation. *Bioinformatics* **18**, 337–338 (2002). [Medline doi:10.1093/bioinformatics/18.2.337](#)



161. J. D. Wall *et al.*, Estimating genotype error rates from high-coverage next-generation sequence data. *Genome Res.*, gr.168393.113 (2014).
162. A. L. Price, A. Tandon, N. Patterson, K. C. Barnes, N. Rafaels, I. Ruczinski, T. H. Beaty, R. Mathias, D. Reich, S. Myers, Sensitive detection of chromosomal segments of distinct ancestry in admixed populations. *PLOS Genet.* **5**, e1000519 (2009). [Medline](#)  
[doi:10.1371/journal.pgen.1000519](https://doi.org/10.1371/journal.pgen.1000519)
163. S. Sankararaman, G. Kimmel, E. Halperin, M. I. Jordan, On the inference of ancestries in admixed populations. *Genome Res.* **18**, 668–675 (2008). [Medline](#)  
[doi:10.1101/gr.072751.107](https://doi.org/10.1101/gr.072751.107)
164. G. R. Abecasis, A. Auton, L. D. Brooks, M. A. DePristo, R. M. Durbin, R. E. Handsaker, H. M. Kang, G. T. Marth, G. A. McVean; 1000 Genomes Project Consortium, An integrated map of genetic variation from 1,092 human genomes. *Nature* **491**, 56–65 (2012). [Medline](#)  
[doi:10.1038/nature11632](https://doi.org/10.1038/nature11632)
165. S. Gravel, Population genetics models of local ancestry. *Genetics*, genetics.112.139808 (2012).
166. R. H. Byrd, P. Lu, J. Nocedal, C. Zhu, A limited-memory algorithm for bound constrained optimization. *SIAM J. Sci. Comput.* **16**, 1190–1208 (1994). [doi:10.1137/0916069](#)
167. M. Liang, R. Nielsen, The lengths of admixture tracts. *Genetics* **197**, 953–967 (2014).  
[Medline](#) [doi:10.1534/genetics.114.162362](https://doi.org/10.1534/genetics.114.162362)
168. P. Reimer *et al.*, IntCal13 and Marine13 Radiocarbon Age Calibration Curves 0–50,000 Years cal BP. *Radiocarbon* **55**, 1869–1887 (2013). [doi:10.2458/azu\\_js\\_rc.55.16947](#)
169. C. Bronk Ramsey, Bayesian analysis of radiocarbon dates. *Radiocarbon* **51**, 337–360 (2009).
170. M. Sikora, M. L. Carpenter, A. Moreno-Estrada, B. M. Henn, P. A. Underhill, F. Sánchez-Quinto, I. Zara, M. Pitzalis, C. Sidore, F. Busonero, A. Maschio, A. Angius, C. Jones, J. Mendoza-Revilla, G. Nekhrizov, D. Dimitrova, N. Theodossiev, T. T. Harkins, A. Keller, F. Maixner, A. Zink, G. Abecasis, S. Sanna, F. Cucca, C. D. Bustamante, Population genomic analysis of ancient and modern genomes yields new insights into the genetic ancestry of the Tyrolean Iceman and the genetic structure of Europe. *PLOS Genet.* **10**, e1004353 (2014). [Medline](#) [doi:10.1371/journal.pgen.1004353](https://doi.org/10.1371/journal.pgen.1004353)
171. M. Raghavan, M. DeGiorgio, A. Albrechtsen, I. Moltke, P. Skoglund, T. S. Korneliussen, B. Grønnow, M. Appelt, H. C. Gulløv, T. M. Friesen, W. Fitzhugh, H. Malmström, S. Rasmussen, J. Olsen, L. Melchior, B. T. Fuller, S. M. Fahrni, T. Stafford Jr., V. Grimes, M. A. Renouf, J. Cybulski, N. Lynnerup, M. M. Lahr, K. Britton, R. Knecht, J. Arneborg, M. Metspalu, O. E. Cornejo, A. S. Malaspinas, Y. Wang, M. Rasmussen, V. Raghavan, T. V. Hansen, E. Khusnutdinova, T. Pierre, K. Dneprovsky, C. Andreassen, H. Lange, M. G. Hayes, J. Coltrain, V. A. Spitsyn, A. Götherström, L. Orlando, T. Kivisild, R. Villems, M. H. Crawford, F. C. Nielsen, J. Dissing, J. Heinemeier, M. Meldgaard, C. Bustamante, D. H. O’Rourke, M. Jakobsson, M. T. Gilbert, R. Nielsen, E. Willerslev, The genetic prehistory of the New World Arctic. *Science* **345**, 1255832 (2014). [Medline](#)  
[doi:10.1126/science.1255832](https://doi.org/10.1126/science.1255832)

172. J. C. Dohm, C. Lottaz, T. Borodina, H. Himmelbauer, Substantial biases in ultra-short read data sets from high-throughput DNA sequencing. *Nucleic Acids Res.* **36**, e105 (2008). [Medline](#) [doi:10.1093/nar/gkn425](#)
173. K. Nakamura, T. Oshima, T. Morimoto, S. Ikeda, H. Yoshikawa, Y. Shiwa, S. Ishikawa, M. C. Linak, A. Hirai, H. Takahashi, M. Altaf-Ul-Amin, N. Ogasawara, S. Kanaya, Sequence-specific error profile of Illumina sequencers. *Nucleic Acids Res.* **39**, e90 (2011). [Medline](#) [doi:10.1093/nar/gkr344](#)
174. R. R. Hudson, Generating samples under a Wright-Fisher neutral model of genetic variation. *Bioinformatics* **18**, 337–338 (2002). [Medline](#) [doi:10.1093/bioinformatics/18.2.337](#)
175. J. D. Wall et al., Estimating genotype error rates from high-coverage nextgeneration sequence data. *Genome Res.*, gr.168393.113 (2014).
176. A. L. Price, A. Tandon, N. Patterson, K. C. Barnes, N. Rafaels, I. Ruczinski, T. H. Beaty, R. Mathias, D. Reich, S. Myers, Sensitive detection of chromosomal segments of distinct ancestry in admixed populations. *PLOS Genet.* **5**, e1000519 (2009). [Medline](#) [doi:10.1371/journal.pgen.1000519](#)
177. S. Sankararaman, G. Kimmel, E. Halperin, M. I. Jordan, On the inference of ancestries in admixed populations. *Genome Res.* **18**, 668–675 (2008). [Medline](#) [doi:10.1101/gr.072751.107](#)
178. G. R. Abecasis, A. Auton, L. D. Brooks, M. A. DePristo, R. M. Durbin, R. E. Handsaker, H. M. Kang, G. T. Marth, G. A. McVean; 1000 Genomes Project Consortium, An integrated map of genetic variation from 1,092 human genomes. *Nature* **491**, 56–65 (2012). [Medline](#) [doi:10.1038/nature11632](#)
179. S. Gravel, Population Genetics Models of Local Ancestry. *Genetics*, genetics.112.139808 (2012).
180. R. H. Byrd, P. Lu, J. Nocedal, C. Zhu, A Limited-Memory Algorithm for Bound Constrained Optimization. *SIAM J. Sci. Comput.* **16**, 1190–1208 (1994). [doi:10.1137/0916069](#)
181. M. Liang, R. Nielsen, The Lengths of Admixture Tracts. *Genetics* **197**, 953–967 (2014). [Medline](#) [doi:10.1534/genetics.114.162362](#)
182. M. Sikora, M. L. Carpenter, A. Moreno-Estrada, B. M. Henn, P. A. Underhill, F. Sánchez-Quinto, I. Zara, M. Pitzalis, C. Sidore, F. Busonero, A. Maschio, A. Angius, C. Jones, J. Mendoza-Revilla, G. Nekhrizov, D. Dimitrova, N. Theodossiev, T. T. Harkins, A. Keller, F. Maixner, A. Zink, G. Abecasis, S. Sanna, F. Cucca, C. D. Bustamante, Population genomic analysis of ancient and modern genomes yields new insights into the genetic ancestry of the Tyrolean Iceman and the genetic structure of Europe. *PLOS Genet.* **10**, e1004353 (2014). [Medline](#) [doi:10.1371/journal.pgen.1004353](#)
183. M. Raghavan, M. DeGiorgio, A. Albrechtsen, I. Moltke, P. Skoglund, T. S. Korneliussen, B. Grønnow, M. Appelt, H. C. Gulløv, T. M. Friesen, W. Fitzhugh, H. Malmström, S. Rasmussen, J. Olsen, L. Melchior, B. T. Fuller, S. M. Fahrni, T. Stafford Jr., V. Grimes, M. A. Renouf, J. Cybulski, N. Lynnerup, M. M. Lahr, K. Britton, R. Knecht, J. Arneborg, M. Metspalu, O. E. Cornejo, A. S. Malaspinas, Y. Wang, M. Rasmussen, V. Raghavan,

T. V. Hansen, E. Khusnutdinova, T. Pierre, K. Dneprovsky, C. Andreassen, H. Lange, M. G. Hayes, J. Coltrain, V. A. Spitsyn, A. Götherström, L. Orlando, T. Kivisild, R. Villems, M. H. Crawford, F. C. Nielsen, J. Dissing, J. Heinemeier, M. Meldgaard, C. Bustamante, D. H. O'Rourke, M. Jakobsson, M. T. Gilbert, R. Nielsen, E. Willerslev, The genetic prehistory of the New World Arctic. *Science* **345**, 1255832 (2014). [Medline](#)  
[doi:10.1126/science.1255832](https://doi.org/10.1126/science.1255832)
